# Supplementary material for: Assembling triazolated calix[4]semitubes by means of copper(i)-catalyzed azide–alkyne cycloaddition
Source: Royal Society of Chemistry journal article supplement (doi:10.1039/d1qo00636c), 2021-01-01
Supplement: d1qo00636c1.pdf [file d1qo00636c1.pdf]

## Assembling triazolated calix[4]semitubes by means of copper(I)-catalyzed azide–alkyne cycloaddition

Alexander Gorbunov, Nikolay Ozerov, Maria Malakhova, Artur Eshtukov, Dmitry Cheshkov, Stanislav Bezzubov, Vladimir Kovalev and Ivan Vatsouro

### Supplementary Information

#### Contents

|                                                                                                         |    |
|---------------------------------------------------------------------------------------------------------|----|
| Synthesis and characterization of novel compounds.....                                                  | 2  |
| Tuning the conditions for the preparation of calix[4]semitubes.....                                     | 12 |
| NMR spectra of novel compounds.....                                                                     | 15 |
| Details of X-ray diffraction measurements.....                                                          | 29 |
| Changes in NMR spectra of calix[4]semitubes upon addition of Zn <sup>2+</sup> and Ag <sup>+</sup> ..... | 32 |
| Atomic coordinates of the calculated structures.....                                                    | 37 |
| References.....                                                                                         | 46 |

## Synthesis and characterization of novel compounds

*General experimental methods:* NMR spectra were acquired on Bruker Avance 400 and Avance 600 instruments at 20 °C if not stated otherwise, and chemical shifts are reported as ppm referenced to solvent signals. ESI mass spectra were obtained from Sciex TripleTOF 5600+ spectrometers. Chemicals received from commercial sources were used without further purification. Calixarenes **1**,<sup>S1</sup> **2**,<sup>S2</sup> **5**,<sup>S3</sup> **A**,<sup>S4</sup> **B**,<sup>S5</sup> **D**,<sup>S6</sup> and complex CuI·P(OEt)<sub>3</sub>,<sup>S7</sup> were prepared according to the published procedures.

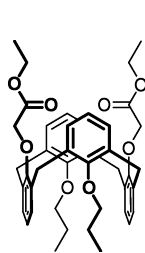

*1,3-Alternate calix[4]arene diester 3.* A suspension of calixarene **1** (1.02 g, 2.0 mmol) and anhydrous Cs<sub>2</sub>CO<sub>3</sub> (2.61 g, 8.0 mmol) in dry DMF (50 ml) was stirred at room temperature for 1 h. Ethyl 2-bromoacetate (1.33 ml, 12.0 mmol) was added and the reaction mixture was stirred at room temperature for 24 h. The solvent was removed under reduced pressure and the residue was dissolved in dichloromethane. The solution was washed with 2 M HCl, water, dried and concentrated to dryness. The resultant oil was purified by column chromatography (gradient from dichloromethane to dichloromethane/ethanol (50:1)). Yield 0.670 g (49%), white solid. For analytical data see Ref. S8.

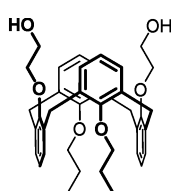

*1,3-Alternate calix[4]arene diol 4.* To a cooled (0–5 °C) suspension of LiAlH<sub>4</sub> (0.210 g, 5.40 mmol) in dry diethyl ether (50 ml) a solution of calixarene **3** (0.370 g, 0.54 mmol) in dry THF was added dropwise. The reaction mixture was stirred at room temperature for 24 h, and then quenched at cooling (0–5 °C) by dropwise addition of 0.5 M HCl (20 ml) under vigorous stirring. The organic layer was separated, the aqueous layer was washed with diethyl ether. The combined organic fractions were washed with water, dried by MgSO<sub>4</sub> and evaporated. Yield 0.210 g (65%), white solid. M.p. >250 °C. <sup>1</sup>H NMR (400 MHz, CDCl<sub>3</sub>): δ = 7.06 (d, 4H, <sup>3</sup>J<sub>HH</sub> = 7.5 Hz; ArH), 7.03 (d, 4H, <sup>3</sup>J<sub>HH</sub> = 7.5 Hz; ArH), 6.88 (t, 2H, <sup>3</sup>J<sub>HH</sub> = 7.5 Hz; ArH), 6.85 (t, 2H, <sup>3</sup>J<sub>HH</sub> = 7.5 Hz; ArH), 3.88 (d, 4H, <sup>2</sup>J<sub>HH</sub> = 16.7 Hz; ArCH<sub>2</sub>Ar), 3.84 (d, 4H, <sup>2</sup>J = 16.7 Hz; ArCH<sub>2</sub>Ar), 3.64–3.59 (m, 4H; CH<sub>2</sub>CH<sub>2</sub>OH), 3.38–3.31 (m, 4H; CH<sub>2</sub>CH<sub>2</sub>CH<sub>3</sub>), 3.31–3.25 (m, 4H; CH<sub>2</sub>OH), 2.37 (t, 2H, <sup>3</sup>J<sub>HH</sub> = 6.7 Hz; OH), 1.05–0.94 (m, 4H; CH<sub>2</sub>CH<sub>3</sub>), 0.62 (t, 6H, <sup>3</sup>J<sub>HH</sub> = 7.5 Hz; CH<sub>2</sub>CH<sub>3</sub>) ppm; <sup>13</sup>C NMR (100 MHz, CDCl<sub>3</sub>): δ = 156.98, 156.07, 133.66, 133.58 (C<sub>Ar</sub>), 129.26, 129.22, 122.79, 122.71 (CH<sub>Ar</sub>), 71.85, 71.00 (OCH<sub>2</sub>), 61.19 (CH<sub>2</sub>OH), 38.20 (ArCH<sub>2</sub>Ar), 22.15 (CH<sub>2</sub>CH<sub>3</sub>), 9.93 (CH<sub>3</sub>) ppm. ESI-MS *m/z*: 597.3209 [M+H]<sup>+</sup> for C<sub>38</sub>H<sub>45</sub>O<sub>6</sub> (597.3211).

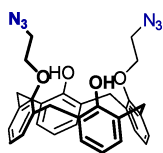

*Cone calix[4]arene bis(azide) 6.* A mixture of bromoethylated calix[4]arene **5** (1.56 g, 2.45 mmol) and  $\text{NaN}_3$  (0.637 g, 9.80 mmol) in dry DMF (65 ml) was stirred at 60 °C for 8 h. The solvent was removed under reduced pressure, and the residue was parted between dichloromethane and aqueous 2 M HCl. The organic

layer was separated, washed with water, dried with  $\text{MgSO}_4$  and concentrated to dryness. The residue was purified by re-crystallization from dichloromethane/methanol. Yield 1.22 g (89%), white solid. M.p. 227–229 °C.  $^1\text{H}$  NMR (400 MHz,  $\text{CDCl}_3$ ):  $\delta$  = 7.50 (s, 2H; OH), 7.07 (d, 4H,  $^3J_{\text{HH}} = 7.5$  Hz; ArH), 6.87 (d, 4H,  $^3J_{\text{HH}} = 7.5$  Hz; ArH), 6.76–6.71 (m, 2H; ArH), 6.67 (t, 2H,  $^3J_{\text{HH}} = 7.5$  Hz; ArH), 4.35 (d, 4H,  $^2J_{\text{HH}} = 13.1$  Hz;  $\text{ArCH}_2\text{Ar}$ ), 4.10–4.06 (m, 4H;  $\text{OCH}_2$ ), 3.90–3.85 (m, 4H;  $\text{CH}_2\text{N}_3$ ), 3.39 (d, 4H;  $^2J_{\text{HH}} = 13.1$  Hz;  $\text{ArCH}_2\text{Ar}$ ) ppm;  $^{13}\text{C}$  NMR (100 MHz,  $\text{CDCl}_3 + \text{CD}_3\text{OD}$ ):  $\delta$  = 152.75, 151.20, 132.76 ( $\text{C}_{\text{Ar}}$ ), 128.79, 128.60 ( $\text{CH}_{\text{Ar}}$ ), 127.63 ( $\text{C}_{\text{Ar}}$ ), 125.29, 118.88 ( $\text{CH}_{\text{Ar}}$ ), 74.05 ( $\text{OCH}_2$ ), 50.82 ( $\text{CH}_2\text{N}_3$ ), 30.85 ( $\text{ArCH}_2\text{Ar}$ ) ppm. ESI-MS  $m/z$ : 580.2667  $[\text{M} + \text{NH}_4]^+$  for  $\text{C}_{32}\text{H}_{34}\text{N}_7\text{O}_4$  (580.2667).

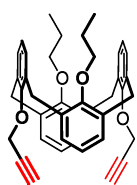

*1,3-Alternate calix[4]arene bis(alkyne) C.* Method 1. A mixture of calix[4]arene **1** (1.02 g, 2.0 mmol) and anhydrous  $\text{Cs}_2\text{CO}_3$  (2.61 g, 8.0 mmol) in dry DMF (50 ml) was stirred at room temperature for 2 h. Propargyl bromide (80% in toluene, 0.89 ml, 8.0 mmol) was added and stirring was continued for 48 h at room temperature. The

solvent was removed under reduced pressure without heating, and the residue was parted between dichloromethane and 2 M HCl. The organic layer was separated, washed with water, dried with  $\text{MgSO}_4$  and concentrated to dryness. The residue was purified by column chromatography (gradient from hexane/dichloromethane (1:1) to dichloromethane). Yield 0.19 g (16%). Method 2. A mixture of calix[4]arene **2** (1.40 g, 2.8 mmol) and anhydrous  $\text{Cs}_2\text{CO}_3$  (4.50 g, 14.0 mmol) in dry DMF (70 ml) was stirred at room temperature for 2 h. 1-Iodopropane (0.66 ml, 14.7 mmol) was added and stirring was continued for 24 h at 50 °C. The solvent was removed under reduced pressure (with heating at < 50 °C), and the residue was parted between dichloromethane and 2 M HCl. The organic layer was separated, washed with water, dried with  $\text{MgSO}_4$ , and concentrated to dryness. The residue was purified by re-crystallization from dichloromethane/methanol. Yield 0.61 g (37%), white solid. M.p. 206–208 °C.  $^1\text{H}$  NMR (400 MHz,  $\text{CDCl}_3$ ):  $\delta$  = 7.11 (d, 4H,  $^3J_{\text{HH}} = 7.6$  Hz; ArH), 7.00 (d, 4H,  $^3J_{\text{HH}} = 7.6$  Hz; ArH), 6.76 (t, 2H,  $^3J_{\text{HH}} = 7.6$  Hz; ArH), 6.73 (t, 2H,  $^3J_{\text{HH}} = 7.6$  Hz; ArH), 4.04 (d, 4H,  $^4J_{\text{HH}} = 2.4$  Hz;  $\text{OCH}_2\text{CCH}$ ), 3.76 (d, 4H,  $^2J_{\text{HH}} = 14.4$  Hz;  $\text{ArCH}_2\text{Ar}$ ), 3.63 (d, 4H,  $^2J_{\text{HH}} = 14.4$  Hz;  $\text{ArCH}_2\text{Ar}$ ), 3.53–3.46 (m, 4H;  $\text{OCH}_2$ ), 2.42 (t, 2H,  $^4J_{\text{HH}} = 2.4$  Hz;  $\text{CCH}$ ), 1.67–1.55 (m, 4H;  $\text{CH}_2\text{CH}_3$ ), 0.88 (t, 6H,  $^3J_{\text{HH}} = 7.6$  Hz;  $\text{CH}_3$ ) ppm;  $^{13}\text{C}$  NMR (100 MHz,  $\text{CDCl}_3$ ):  $\delta$  = 156.45, 155.26, 134.26, 133.62 ( $\text{C}_{\text{Ar}}$ ), 130.23, 130.08, 122.40, 122.18 ( $\text{CH}_{\text{Ar}}$ ), 80.49 ( $\text{OCH}_2\text{C}$ ), 74.40, 73.53 (CH,  $\text{OCH}_2$ ),

58.96 (OCH<sub>2</sub>CCH), 36.75 (ArCH<sub>2</sub>Ar), 23.45 (CH<sub>2</sub>CH<sub>3</sub>), 10.35 (CH<sub>3</sub>) ppm. ESI-MS *m/z*: 585.2997 [M+H]<sup>+</sup> for C<sub>40</sub>H<sub>41</sub>O<sub>4</sub> (585.2999).

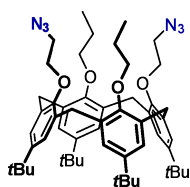

*Cone calix[4]arene bis(azide) E.* To a solution of calix[4]arene **D** (1.96 g, 2.5 mmol) in dry DMF (100 ml) NaH (60%, 0.60 g, 15.0 mmol) was added. The mixture was stirred for 1 h at room temperature and 1-iodopropane (1.22 ml, 12.5 mmol) was added. The mixture was stirred at room temperature for 48 h. The reaction was quenched by a dropwise addition of water and the solution was concentrated under reduced pressure. Water (100 ml) was added to the residue, the precipitate was filtered and washed with water. The residue was purified by re-crystallization from dichloromethane/methanol. Yield 1.54 g (71%), white solid. For analytical data see Ref. S9.

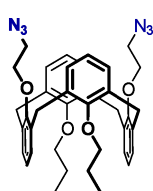

*1,3-Alternate calix[4]arene bis(azide) F. Method 1.* Diisopropyl azodicarboxylate (0.270 ml, 1.38 mmol) was added dropwise at stirring to a cooled (0–5 °C) solution of Ph<sub>3</sub>P (0.270 g, 1.03 mmol) in dry THF (4 ml). After a solid formed, the mixture was stirred at cooling for 1 h. A solution of calix[4]arene **4** (0.205 g, 0.34 mmol) and diphenyl phosphoryl azide (0.296 ml, 1.38 mmol) in THF (10 ml) was added dropwise. The reaction mixture was stirred at cooling for 1 h and then allowed to stay at room temperature for 48 h. The solution was concentrated under reduced pressure and the resultant oil was treated with cold methanol. The solid formed was collected, washed with methanol and dried. Yield 0.093 g (42%). *Method 2.* A suspension of calix[4]arene **6** (0.560 g, 1.0 mmol) and anhydrous Cs<sub>2</sub>CO<sub>3</sub> (1.30 g, 4.0 mmol) in dry DMF (30 ml) was stirred at room temperature for 2 h. 1-Iodopropane (0.39 ml, 4.0 mmol) was added to the mixture and stirring was continued for 48 h at room temperature. The solvent was removed under reduced pressure, and the residue was parted between dichloromethane and 2 M HCl. The organic layer was separated, washed with water, dried with MgSO<sub>4</sub> and concentrated to dryness. The residue was purified by column chromatography (gradient from hexane/dichloromethane (3:2) to dichloromethane). Yield 0.350 g (54%), white solid. M.p. 118–120 °C. <sup>1</sup>H NMR (600 MHz, CDCl<sub>3</sub>): δ = 7.05 (d, 4H, <sup>3</sup>J<sub>HH</sub> = 7.6 Hz; ArH), 7.02 (d, 4H, <sup>3</sup>J<sub>HH</sub> = 7.6 Hz; ArH), 6.81 (t, 2H, <sup>3</sup>J<sub>HH</sub> = 7.6 Hz; ArH), 6.77 (t, 2H, <sup>3</sup>J<sub>HH</sub> = 7.6 Hz; ArH), 3.77 (d, 4H, <sup>2</sup>J<sub>HH</sub> = 15.3 Hz; ArCH<sub>2</sub>Ar), 3.71 (d, 4H, <sup>2</sup>J<sub>HH</sub> = 15.3 Hz; ArCH<sub>2</sub>Ar), 3.51–3.48 (m, 4H; OCH<sub>2</sub>), 3.47–3.44 (m, 4H; OCH<sub>2</sub>), 3.04–3.01 (m, 4H; CH<sub>2</sub>N<sub>3</sub>), 1.42–1.35 (m, 4H; CH<sub>2</sub>CH<sub>2</sub>CH<sub>3</sub>), 0.76 (t, 6H, <sup>3</sup>J<sub>HH</sub> = 7.6 Hz; CH<sub>3</sub>) ppm; <sup>13</sup>C NMR (100 MHz, CDCl<sub>3</sub>): δ = 156.94, 155.42, 133.91, 133.60 (C<sub>Ar</sub>), 129.76, 129.31, 122.49, 122.26 (CH<sub>Ar</sub>), 72.65, 68.31 (OCH<sub>2</sub>), 50.34 (CH<sub>2</sub>N<sub>3</sub>), 37.20 (ArCH<sub>2</sub>Ar), 22.96 (CH<sub>2</sub>CH<sub>3</sub>), 10.24 (CH<sub>3</sub>) ppm. ESI-MS *m/z*: 664.3602 [M+NH<sub>4</sub>]<sup>+</sup> for C<sub>38</sub>H<sub>46</sub>N<sub>7</sub>O<sub>4</sub> (664.3606).

*General procedure for the preparation of calix[4]semitubes.* To a stirred mixture of calixarene (bis)alkyne and (bis)azide in toluene or THF, Cu(I)-catalyst was added (CuI dissolved in a small portion of toluene by addition of Et<sub>3</sub>N, or CuSO<sub>4</sub>·5H<sub>2</sub>O/sodium ascorbate mixture dissolved in water). The mixture was stirred at room temperature or at heating, and then concentrated under reduced pressure. The residue was parted between dichloromethane and 2 M HCl at vigorous stirring for at least 2 h. The organic layer was separated, washed with aqueous Na<sub>2</sub>SO<sub>3</sub> (5%, for CuI-catalyzed reactions only), water and dried with MgSO<sub>4</sub>. The solvent was removed and the residue was subjected to column chromatography. The two-step column separation was applied in several cases: from the first column, a polymeric material was first eluted followed by a semitube-containing fraction, which was then evaporated to dryness and subjected to the second column (with the same or different eluent) for the final purification.

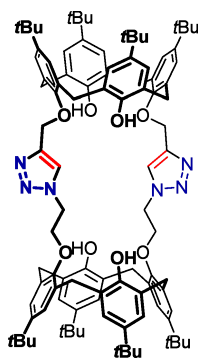

*Calix[4]semitube AD* was prepared according to *General procedure* from calixarene **A** (0.145 g, 0.20 mmol), calixarene **D** (0.157 g, 0.20 mmol), CuI (0.012 g, 0.06 mmol) and Et<sub>3</sub>N (0.170 ml, 1.20 mmol) in toluene (15 ml). The reaction mixture was stirred at room temperature for 48 h. Column 1: gradient from dichloromethane to dichloromethane/ethanol (50:1), column 2: gradient from hexane to hexane/ethyl acetate (3:1). Yield 0.095 g (31%), white solid. For analytical data see Ref. S10.

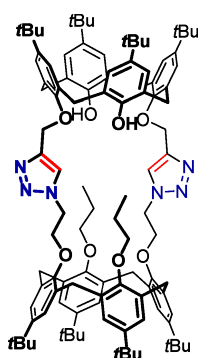

*Calix[4]semitube AE* was prepared according to *General procedure* from calixarene **A** (0.072 g, 0.10 mmol), calixarene **E** (0.087 g, 0.10 mmol), CuI (0.006 g, 0.03 mmol) and Et<sub>3</sub>N (1 ml) in toluene (10 ml). The reaction mixture was stirred at 70 °C for 9 h. Column: gradient from dichloromethane to dichloromethane/ethanol (50:1). Yield 0.042 g (26%), white solid. M.p. >250 °C. <sup>1</sup>H NMR (400 MHz, CDCl<sub>3</sub>): δ = 7.92 (s, 2H; ArH<sub>Trz</sub>), 7.18 (s, 4H; ArH), 7.11 (s, 2H; OH), 7.08 (s, 4H; ArH), 6.82 (s, 4H; ArH), 6.52 (s, 4H; ArH), 5.36–5.28 (m, 4H; NCH<sub>2</sub>), 5.20 (s, 4H; OCH<sub>2</sub>Trz), 4.51–4.43 (m, 4H; NCH<sub>2</sub>CH<sub>2</sub>), 4.39 (d, 4H, <sup>2</sup>J<sub>HH</sub> = 12.8 Hz; ArCH<sub>2</sub>Ar), 4.36 (d, 4H, <sup>2</sup>J<sub>HH</sub> = 13.1 Hz; ArCH<sub>2</sub>Ar), 3.80–3.74 (m, 4H; OCH<sub>2</sub>CH<sub>2</sub>CH<sub>3</sub>), 3.38 (d, 4H, <sup>2</sup>J<sub>HH</sub> = 13.1 Hz; ArCH<sub>2</sub>Ar), 3.25 (d, 4H, <sup>2</sup>J<sub>HH</sub> = 12.8 Hz; ArCH<sub>2</sub>Ar), 1.97–1.85 (m, 4H; CH<sub>2</sub>CH<sub>3</sub>), 1.37 (s, 18H; C(CH<sub>3</sub>)<sub>3</sub>), 1.30 (s, 18H; C(CH<sub>3</sub>)<sub>3</sub>), 0.96 (s, 18H; C(CH<sub>3</sub>)<sub>3</sub>), 0.92 (t, 6H, <sup>3</sup>J<sub>HH</sub> = 7.4 Hz; CH<sub>3</sub>), 0.84 (s, 18H; C(CH<sub>3</sub>)<sub>3</sub>) ppm; <sup>13</sup>C NMR (100 MHz, CDCl<sub>3</sub>): δ = 153.30, 151.81, 150.55, 149.87, 147.27, 146.20 (C<sub>Ar</sub>), 144.69 (C<sub>Ar Trz</sub>)\*, 144.46, 141.58, 135.34, 132.49, 131.69, 127.71 (C<sub>Ar</sub>), 125.84, 125.61, 124.99, 124.66 (CH<sub>Ar</sub>), 122.25

(CH<sub>Ar Trz</sub>)<sup>\*</sup>, 78.03, 71.85, 70.05 (OCH<sub>2</sub>), 49.18 (NCH<sub>2</sub>), 34.16, 33.92, 33.80, 33.60 (C(CH<sub>3</sub>)<sub>3</sub>), 31.67, 31.08, 30.95 (C(CH<sub>3</sub>)<sub>3</sub>), 30.90 (ArCH<sub>2</sub>Ar), 23.58 (CH<sub>2</sub>CH<sub>3</sub>), 10.38 (CH<sub>3</sub>) ppm. ESI-MS *m/z*: 1597.0377 [M+H]<sup>+</sup> for C<sub>104</sub>H<sub>135</sub>N<sub>6</sub>O<sub>8</sub> (1597.0369).

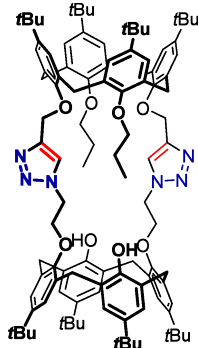

*Calix[4]semitube BD* was prepared according to *General procedure* from calixarene **B** (0.162 g, 0.20 mmol), calixarene **D** (0.157 g, 0.20 mmol), CuI (0.012 g, 0.06 mmol) and Et<sub>3</sub>N (1 ml) in toluene (15 ml). The reaction mixture was stirred at 70 °C for 9 h. Column: gradient from dichloromethane to dichloromethane/ethanol (50:1), the product separated from the column was additionally washed with methanol. Yield 0.139 g (44%), white solid. M.p.

>250 °C. <sup>1</sup>H NMR (600 MHz, CDCl<sub>3</sub>): δ = 8.43 (s, 2H; ArH<sub>Trz</sub>), 7.07 (s, 4H; ArH), 7.01 (s, 4H; ArH), 6.74 (s, 4H; ArH), 6.46 (s, 2H; OH), 6.43 (s, 4H; ArH), 5.27 (s, 4H; OCH<sub>2</sub>Trz), 5.09–5.06 (m, 4H; NCH<sub>2</sub>), 4.50–4.46 (m, 4H; NCH<sub>2</sub>CH<sub>2</sub>), 4.19 (d, 4H, <sup>2</sup>J<sub>HH</sub> = 12.6 Hz; ArCH<sub>2</sub>Ar), 4.00 (d, 4H, <sup>2</sup>J<sub>HH</sub> = 13.0 Hz; ArCH<sub>2</sub>Ar), 3.59–3.55 (m, 4H; OCH<sub>2</sub>CH<sub>2</sub>CH<sub>3</sub>), 3.26 (d, 4H, <sup>2</sup>J<sub>HH</sub> = 13.0 Hz; ArCH<sub>2</sub>Ar), 3.02 (d, 4H, <sup>2</sup>J<sub>HH</sub> = 12.6 Hz; ArCH<sub>2</sub>Ar), 1.55–1.49 (m, 4H; CH<sub>2</sub>CH<sub>3</sub>), 1.32 (s, 18H; C(CH<sub>3</sub>)<sub>3</sub>), 1.27 (s, 18H; C(CH<sub>3</sub>)<sub>3</sub>), 0.92 (s, 18H; C(CH<sub>3</sub>)<sub>3</sub>), 0.81 (t, 6H, <sup>3</sup>J<sub>HH</sub> = 7.4 Hz; CH<sub>3</sub>), 0.80 (s, 18H; C(CH<sub>3</sub>)<sub>3</sub>) ppm; <sup>13</sup>C NMR (100 MHz, CDCl<sub>3</sub>): δ = 153.40, 152.43, 150.18, 149.58, 147.28, 145.70 (C<sub>Ar</sub>), 145.05 (C<sub>Ar Trz</sub>)<sup>\*</sup>, 143.83, 141.67, 135.68, 131.94, 131.91, 127.46 (C<sub>Ar</sub>), 125.68, 125.58, 125.10 (CH<sub>Ar</sub>), 124.67 (CH<sub>Ar Trz</sub>)<sup>\*</sup>, 124.32 (CH<sub>Ar</sub>), 77.12, 74.16, 66.42 (OCH<sub>2</sub>), 50.05 (NCH<sub>2</sub>), 34.03, 33.88, 33.79, 33.51 (C(CH<sub>3</sub>)<sub>3</sub>), 31.70, 31.63 (C(CH<sub>3</sub>)<sub>3</sub>), 31.47, 31.38 (ArCH<sub>2</sub>Ar), 31.11, 30.90 (C(CH<sub>3</sub>)<sub>3</sub>), 22.81 (CH<sub>2</sub>CH<sub>3</sub>), 10.51 (CH<sub>3</sub>) ppm. ESI-MS *m/z*: 1619.0187 [M+Na]<sup>+</sup> for C<sub>104</sub>H<sub>134</sub>NaN<sub>6</sub>O<sub>8</sub> (1619.0189).

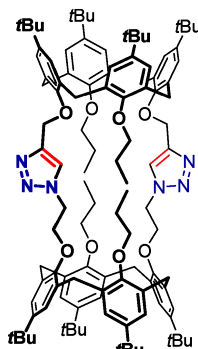

*Calix[4]semitube BE* was prepared according to *General procedure* from calixarene **B** (0.081 g, 0.10 mmol), calixarene **E** (0.087 g, 0.10 mmol), CuI (0.006 g, 0.03 mmol) and Et<sub>3</sub>N (1 ml) in toluene (10 ml). The reaction mixture was stirred at 70 °C for 9 h. Column: gradient from dichloromethane/ethanol (40:1) to dichloromethane/ethanol (10:1). Yield 0.044 g (26%), white solid.

M.p. >250 °C. <sup>1</sup>H NMR (400 MHz, CDCl<sub>3</sub>): δ = 7.63 (s, 2H; ArH<sub>Trz</sub>), 7.18 (s, 4H; ArH), 7.01 (s, 4H; ArH), 6.53 (s, 4H; ArH), 6.47 (s, 4H; ArH), 5.28 (s, 4H; OCH<sub>2</sub>Trz), 5.05–4.99 (m, 4H; NCH<sub>2</sub>), 4.53–4.47 (m, 4H; NCH<sub>2</sub>CH<sub>2</sub>), 4.42 (d, 4H, <sup>2</sup>J<sub>HH</sub> = 12.8 Hz; ArCH<sub>2</sub>Ar), 4.36 (d, 4H, <sup>2</sup>J<sub>HH</sub> = 12.8 Hz; ArCH<sub>2</sub>Ar), 3.80–3.73 (m, 4H; OCH<sub>2</sub>CH<sub>2</sub>CH<sub>3</sub>), 3.71–3.65 (m, 4H; OCH<sub>2</sub>CH<sub>2</sub>CH<sub>3</sub>), 3.22 (d, 4H, <sup>2</sup>J<sub>HH</sub> = 12.8 Hz; ArCH<sub>2</sub>Ar), 3.15 (d, 4H, <sup>2</sup>J<sub>HH</sub> = 12.8 Hz; ArCH<sub>2</sub>Ar), 1.90–1.79 (m, 4H; CH<sub>2</sub>CH<sub>3</sub>), 1.76–1.65 (m, 4H; CH<sub>2</sub>CH<sub>3</sub>), 1.36 (s, 18H; C(CH<sub>3</sub>)<sub>3</sub>), 1.25

(s, 18H; C(CH<sub>3</sub>)<sub>3</sub>), 1.01 (t, 6H, <sup>3</sup>J<sub>HH</sub> = 7.5 Hz; CH<sub>3</sub>), 0.95 (t, 6H, <sup>3</sup>J<sub>HH</sub> = 7.5 Hz; CH<sub>3</sub>), 0.89 (s, 18H; C(CH<sub>3</sub>)<sub>3</sub>), 0.82 (s, 18H; C(CH<sub>3</sub>)<sub>3</sub>) ppm; <sup>13</sup>C NMR (100 MHz, CDCl<sub>3</sub>): δ = 154.00, 152.41, 152.37, 151.72, 146.17, 146.04 (C<sub>Ar</sub>), 144.97 (C<sub>Ar Trz</sub>)\*, 144.31, 144.11, 135.59, 134.94, 132.41, 131.69 (C<sub>Ar</sub>), 125.89, 125.67, 124.51, 124.46 (CH<sub>Ar</sub>), 123.37 (CH<sub>Ar Trz</sub>)\*, 77.67, 76.55, 71.44, 66.43 (OCH<sub>2</sub>), 49.21 (NCH<sub>2</sub>), 34.16, 33.95, 33.63, 33.59 (C(CH<sub>3</sub>)<sub>3</sub>), 31.78 (ArCH<sub>2</sub>Ar), 31.67, 31.59, 31.22, 31.09 (C(CH<sub>3</sub>)<sub>3</sub>), 30.95 (ArCH<sub>2</sub>Ar), 23.14, 22.88 (CH<sub>2</sub>CH<sub>3</sub>), 10.57, 10.52 (CH<sub>3</sub>) ppm. ESI-MS *m/z*: 1703.1123 [M+Na]<sup>+</sup> for C<sub>110</sub>H<sub>146</sub>NaN<sub>6</sub>O<sub>8</sub> (1703.1128).

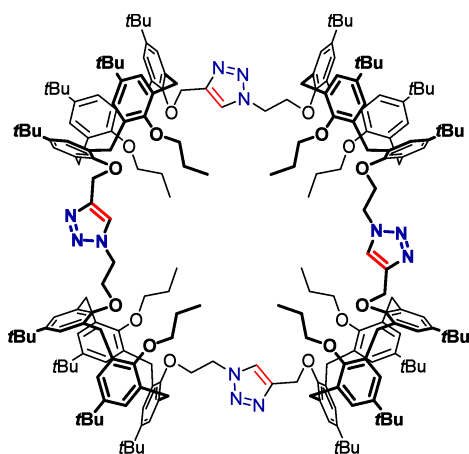

*Tetrakis(calix[4]arene) B<sub>2</sub>E<sub>2</sub>* was isolated as the less polar product during chromatographic purification of calix[4]semitube **BE**. Yield 0.034 g (20%), white solid. M.p. >250 °C. <sup>1</sup>H NMR (600 MHz, CDCl<sub>3</sub>): δ = 7.46 (s, 2H; ArH<sub>Trz</sub>), 7.11 (s, 4H; ArH), 6.72 (s, 4H; ArH), 6.71 (s, 4H; ArH), 6.49 (s, 4H; ArH), 5.29 (s, 4H; OCH<sub>2</sub>Trz), 5.25–5.18 (m, 4H; NCH<sub>2</sub>), 4.45–4.37 (m, 4H; NCH<sub>2</sub>CH<sub>2</sub>), 4.30 (d, 4H, <sup>2</sup>J<sub>HH</sub> = 12.8 Hz; ArCH<sub>2</sub>Ar), 4.28 (d, 4H, <sup>2</sup>J<sub>HH</sub> = 12.7 Hz; ArCH<sub>2</sub>Ar), 3.82–3.76 (m, 4H; OCH<sub>2</sub>CH<sub>2</sub>CH<sub>3</sub>), 3.72–3.67 (m, 4H; OCH<sub>2</sub>CH<sub>2</sub>CH<sub>3</sub>), 3.17 (d, 4H, <sup>2</sup>J<sub>HH</sub> = 12.8 Hz; ArCH<sub>2</sub>Ar), 2.99 (d, 4H, <sup>2</sup>J<sub>HH</sub> = 12.7 Hz; ArCH<sub>2</sub>Ar), 2.05–1.94 (m, 4H; CH<sub>2</sub>CH<sub>3</sub>), 1.91–1.80 (m, 4H; CH<sub>2</sub>CH<sub>3</sub>), 1.34 (s, 18H; C(CH<sub>3</sub>)<sub>3</sub>), 1.05

(s, 18H; C(CH<sub>3</sub>)<sub>3</sub>), 1.01 (s, 18H; C(CH<sub>3</sub>)<sub>3</sub>), 1.00 (t, 6H, <sup>3</sup>J<sub>HH</sub> = 7.5 Hz; CH<sub>3</sub>), 0.94 (t, 6H, <sup>3</sup>J<sub>HH</sub> = 7.5 Hz; CH<sub>3</sub>), 0.84 (s, 18H; C(CH<sub>3</sub>)<sub>3</sub>) ppm; <sup>13</sup>C NMR (100 MHz, CDCl<sub>3</sub>): δ = 154.02, 153.43, 151.97, 151.67, 145.95 (C<sub>Ar</sub>), 144.68 (C<sub>Ar Trz</sub>)\*, 144.41, 144.25, 144.03, 135.09, 134.57, 133.60, 131.76 (C<sub>Ar</sub>), 125.67, 124.72, 124.71, 124.62 (CH<sub>Ar</sub>), 123.62 (CH<sub>Ar Trz</sub>)\*, 77.84, 77.20, 71.56, 65.80 (OCH<sub>2</sub>), 49.28 (NCH<sub>2</sub>), 34.12, 33.73, 33.60 (C(CH<sub>3</sub>)<sub>3</sub>), 31.67 (C(CH<sub>3</sub>)<sub>3</sub>), 31.57 (ArCH<sub>2</sub>Ar), 31.41, 31.35, 31.09 (C(CH<sub>3</sub>)<sub>3</sub>), 30.90 (ArCH<sub>2</sub>Ar), 23.54, 23.23 (CH<sub>2</sub>CH<sub>3</sub>), 10.73, 10.57 (CH<sub>3</sub>) ppm. ESI-MS *m/z*: 1703.1115 [M+2Na]<sup>2+</sup> for C<sub>220</sub>H<sub>292</sub>Na<sub>2</sub>N<sub>12</sub>O<sub>16</sub> (1703.1128).

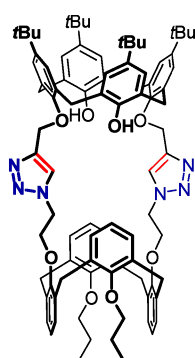

*Calix[4]semitube AF* was prepared according to *General procedure* from calixarene **A** (0.072 g, 0.10 mmol), calixarene **F** (0.065 g, 0.10 mmol), CuI (0.019 g, 0.10 mmol) and Et<sub>3</sub>N (3 ml) in toluene (10 ml). The reaction mixture was stirred at room temperature for 48 h. Column: gradient from dichloromethane to dichloromethane/ethanol (100:1). Yield 0.026 g (19%), white solid. M.p. >250 °C. <sup>1</sup>H NMR (400 MHz, CDCl<sub>3</sub>): δ = 7.83 (s, 2H; ArH<sub>Trz</sub>), 7.08 (s, 4H; ArH), 7.04 (d, 4H, <sup>3</sup>J<sub>HH</sub> = 7.5 Hz; ArH), 7.02–6.97 (m, 6H; ArH), 6.91–

6.86 (m, 2H; ArH), 6.81 (s, 2H; OH), 6.76 (s, 4H; ArH), 5.18 (s, 4H; OCH<sub>2</sub>Trz), 4.31 (d, 4H, <sup>2</sup>J<sub>HH</sub> = 13.1 Hz; ArCH<sub>2</sub>Ar), 4.01–3.96 (m, 4H; NCH<sub>2</sub>), 3.94 (d, 4H, <sup>2</sup>J<sub>HH</sub> = 16.7 Hz; ArCH<sub>2</sub>Ar), 3.85 (d, 4H, <sup>2</sup>J<sub>HH</sub> = 16.7 Hz; ArCH<sub>2</sub>Ar), 3.62–3.56 (m, 4H; NCH<sub>2</sub>CH<sub>2</sub>), 3.42–3.37 (m, 4H; OCH<sub>2</sub>CH<sub>2</sub>CH<sub>3</sub>), 3.37 (d, 4H, <sup>2</sup>J<sub>HH</sub> = 13.1 Hz; ArCH<sub>2</sub>Ar), 1.29 (s, 18H; C(CH<sub>3</sub>)<sub>3</sub>), 1.20–1.09 (m, 4H; CH<sub>2</sub>CH<sub>3</sub>), 0.91 (s, 18H; C(CH<sub>3</sub>)<sub>3</sub>), 0.58 (t, 6H, <sup>3</sup>J<sub>HH</sub> = 7.5 Hz; CH<sub>3</sub>) ppm; <sup>13</sup>C NMR (100 MHz, CDCl<sub>3</sub>): δ = 157.73, 155.14, 150.31, 149.48, 147.41 (C<sub>Ar</sub>), 144.62 (C<sub>Ar</sub>Trz), 141.87, 134.18, 133.40, 132.22 (C<sub>Ar</sub>), 129.33, 128.79 (CH<sub>Ar</sub>), 127.80 (C<sub>Ar</sub>), 125.60, 125.12, 123.20 (CH<sub>Ar</sub>), 122.90 (CH<sub>Ar</sub>Trz)\*, 122.57 (CH<sub>Ar</sub>), 71.68, 70.41, 66.74 (OCH<sub>2</sub>), 48.71 (NCH<sub>2</sub>), 38.03 (ArCH<sub>2</sub>Ar), 33.90, 33.84 (C(CH<sub>3</sub>)<sub>3</sub>), 31.67 (C(CH<sub>3</sub>)<sub>3</sub>), 31.42 (ArCH<sub>2</sub>Ar), 30.92 (C(CH<sub>3</sub>)<sub>3</sub>), 22.66 (CH<sub>2</sub>CH<sub>3</sub>), 10.18 (CH<sub>3</sub>) ppm. ESI-MS *m/z*: 1371.7831 [M+H]<sup>+</sup> for C<sub>88</sub>H<sub>103</sub>N<sub>6</sub>O<sub>8</sub> (1371.7832).

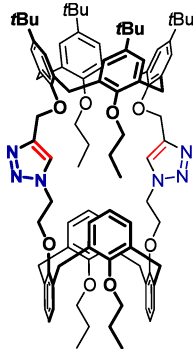

*Calix[4]semitube BF* was prepared according to *General procedure* from calixarene **B** (0.081 g, 0.10 mmol), calixarene **F** (0.065 g, 0.10 mmol), CuI (0.019 g, 0.10 mmol) and Et<sub>3</sub>N (3 ml) in toluene (10 ml). The reaction mixture was stirred at 70 °C for 9 h. Column: gradient from dichloromethane to dichloromethane/ethanol (50:1). Yield 0.060 g (41%), white solid. M.p. >250 °C. <sup>1</sup>H NMR (400 MHz, CDCl<sub>3</sub>): δ = 7.53 (s, 2H; ArH<sub>Trz</sub>), 7.09 (s, 4H; ArH), 7.03 (d, 4H, <sup>3</sup>J<sub>HH</sub> = 7.5 Hz; ArH), 6.80 (t, 2H, <sup>3</sup>J<sub>HH</sub> = 7.5 Hz; ArH), 6.71–6.64

(m, 6H; ArH), 6.42 (s, 4H; ArH), 5.39 (s, 4H; OCH<sub>2</sub>Trz), 4.23 (d, 4H, <sup>2</sup>J<sub>HH</sub> = 12.7 Hz; ArCH<sub>2</sub>Ar), 4.16–4.10 (m, 4H; NCH<sub>2</sub>), 4.05–4.00 (m, 4H; NCH<sub>2</sub>CH<sub>2</sub>), 3.77 (d, 4H, <sup>2</sup>J<sub>HH</sub> = 15.5 Hz; ArCH<sub>2</sub>Ar), 3.70–3.64 (m, 4H; OCH<sub>2</sub>CH<sub>2</sub>CH<sub>3</sub>), 3.63 (d, 4H, <sup>2</sup>J<sub>HH</sub> = 15.5 Hz; ArCH<sub>2</sub>Ar), 3.52–3.46 (m, 4H; OCH<sub>2</sub>CH<sub>2</sub>CH<sub>3</sub>), 3.09 (d, 4H, <sup>2</sup>J<sub>HH</sub> = 12.7 Hz; ArCH<sub>2</sub>Ar), 1.81–1.69 (m, 4H; CH<sub>2</sub>CH<sub>3</sub>), 1.47–1.36 (m, 4H; CH<sub>2</sub>CH<sub>3</sub>), 1.32 (s, 18H; C(CH<sub>3</sub>)<sub>3</sub>), 1.03 (t, 6H, <sup>3</sup>J<sub>HH</sub> = 7.5 Hz; CH<sub>3</sub>), 0.81 (s, 18H; C(CH<sub>3</sub>)<sub>3</sub>), 0.75 (t, 6H, <sup>3</sup>J<sub>HH</sub> = 7.5 Hz; CH<sub>3</sub>) ppm; <sup>13</sup>C NMR (100 MHz, CDCl<sub>3</sub>): δ = 157.42, 155.29, 153.51, 152.49, 145.16 (C<sub>Ar</sub>), 145.12 (C<sub>Ar</sub>Trz)\*, 143.98, 135.60, 133.92, 133.06, 131.73 (C<sub>Ar</sub>), 130.21, 129.15, 125.78 (CH<sub>Ar</sub>), 125.25 (CH<sub>Ar</sub>Trz)\*, 124.34, 122.64, 121.42 (CH<sub>Ar</sub>), 77.02, 72.58, 68.80, 65.64 (OCH<sub>2</sub>), 49.75 (NCH<sub>2</sub>), 37.22 (ArCH<sub>2</sub>Ar), 34.02, 33.51 (C(CH<sub>3</sub>)<sub>3</sub>), 31.71 (ArCH<sub>2</sub>Ar), 31.67, 31.09 (C(CH<sub>3</sub>)<sub>3</sub>), 23.21, 23.06 (CH<sub>2</sub>CH<sub>3</sub>), 10.64, 10.21 (CH<sub>3</sub>) ppm. ESI-MS *m/z*: 1478.8627 [M+Na]<sup>+</sup> for C<sub>94</sub>H<sub>114</sub>NaN<sub>6</sub>O<sub>8</sub> (1478.8624).



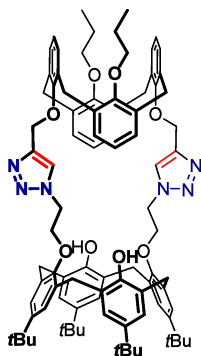

*Calix[4]semitube CD* was prepared according to *General procedure* from calixarene **C** (0.115 g, 0.20 mmol), calixarene **D** (0.157 g, 0.20 mmol), CuI (0.012 g, 0.06 mmol) and Et<sub>3</sub>N (0.170 ml, 1.20 mmol) in toluene (15 ml). The reaction mixture was stirred at room temperature for 48 h. Column: gradient from dichloromethane to dichloromethane/ethanol (100:1), the product separated from the column was additionally washed with hexane. Yield 0.124 g (46%), white solid. M.p. 244–246 °C. <sup>1</sup>H NMR (400 MHz, CDCl<sub>3</sub>): δ = 7.08 (s, 4H; ArH), 7.04 (d, 4H, <sup>3</sup>J<sub>HH</sub> = 7.5 Hz; ArH), 7.04 (s, 2H; OH), 6.86 (t, 2H, <sup>3</sup>J<sub>HH</sub> = 7.5 Hz; ArH), 6.77 (s, 4H; ArH), 6.70 (d, 4H, <sup>3</sup>J<sub>HH</sub> = 7.5 Hz; ArH), 6.46 (s, 2H; ArH<sub>Trz</sub>), 6.26 (t, 2H, <sup>3</sup>J<sub>HH</sub> = 7.5 Hz; ArH), 5.00–4.92 (m, 4H; NCH<sub>2</sub>), 4.85 (c, 4H; OCH<sub>2</sub>Trz), 4.41–4.34 (m, 4H; NCH<sub>2</sub>CH<sub>2</sub>), 4.00 (d, 4H, <sup>2</sup>J<sub>HH</sub> = 13.2 Hz; ArCH<sub>2</sub>Ar), 3.76 (d, 4H, <sup>2</sup>J<sub>HH</sub> = 15.9 Hz; ArCH<sub>2</sub>Ar), 3.60 (d, 4H, <sup>2</sup>J<sub>HH</sub> = 15.9 Hz; ArCH<sub>2</sub>Ar), 3.38 (d, 4H, <sup>2</sup>J<sub>HH</sub> = 13.2 Hz; ArCH<sub>2</sub>Ar), 3.29–3.24 (m, 4H; OCH<sub>2</sub>CH<sub>2</sub>CH<sub>3</sub>), 1.30 (s, 18H; C(CH<sub>3</sub>)<sub>3</sub>), 1.30–1.22 (m, 4H; CH<sub>2</sub>CH<sub>3</sub>), 0.90 (s, 18H; C(CH<sub>3</sub>)<sub>3</sub>), 0.66 (t, 6H, <sup>3</sup>J<sub>HH</sub> = 7.5 Hz; CH<sub>3</sub>) ppm; <sup>13</sup>C NMR (100 MHz, CDCl<sub>3</sub>): δ = 156.95, 155.53, 150.01, 148.64, 147.76 (C<sub>Ar</sub>), 144.77 (C<sub>Ar Trz</sub>), 142.07, 134.47, 134.06, 131.92 (C<sub>Ar</sub>), 129.78, 128.94 (CH<sub>Ar</sub>), 127.24 (C<sub>Ar</sub>), 125.80 (CH<sub>Ar</sub>), 125.54 (CH<sub>Ar Trz</sub>)\*, 125.14, 122.98, 121.56 (CH<sub>Ar</sub>), 73.59, 71.58, 63.68 (OCH<sub>2</sub>), 49.16 (NCH<sub>2</sub>), 38.08 (ArCH<sub>2</sub>Ar), 33.89, 33.86 (C(CH<sub>3</sub>)<sub>3</sub>), 31.65 (C(CH<sub>3</sub>)<sub>3</sub>), 31.48 (ArCH<sub>2</sub>Ar), 30.83 (C(CH<sub>3</sub>)<sub>3</sub>), 22.79 (CH<sub>2</sub>CH<sub>3</sub>), 10.03 (CH<sub>3</sub>) ppm. ESI-MS *m/z*: 1393.7649 [M+Na]<sup>+</sup> for C<sub>88</sub>H<sub>102</sub>NaN<sub>6</sub>O<sub>8</sub> (1393.7651).

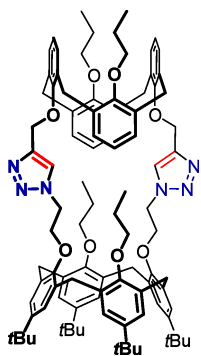

*Calix[4]semitube CE* was prepared according to *General procedure* from calixarene **C** (0.199 g, 0.34 mmol), calixarene **E** (0.296 g, 0.34 mmol), CuI (0.019 g, 0.10 mmol) and Et<sub>3</sub>N (5 ml) in toluene (25 ml). The reaction mixture was stirred at 60 °C for 9 h. Column: gradient from dichloromethane to dichloromethane/ethanol (20:1). Yield 0.065 g (13%), white solid. M.p. >250 °C. <sup>1</sup>H NMR (600 MHz, CDCl<sub>3</sub>): δ = 7.20 (bs, 6H; ArH + ArH<sub>Trz</sub>), 7.08 (d, 4H, <sup>3</sup>J<sub>HH</sub> = 7.6 Hz; ArH), 6.82 (t, 2H, <sup>3</sup>J<sub>HH</sub> = 7.6 Hz; ArH), 6.78 (d, 4H, <sup>3</sup>J<sub>HH</sub> = 7.4 Hz; ArH), 6.55 (s, 4H; ArH), 6.35 (t, 2H, <sup>3</sup>J<sub>HH</sub> = 7.4 Hz; ArH), 5.24–5.19 (m, 4H; OCH<sub>2</sub>CH<sub>2</sub>), 4.85 (s, 4H; OCH<sub>2</sub>Trz), 4.55–4.49 (m, 4H; OCH<sub>2</sub>CH<sub>2</sub>), 4.43 (d, 4H, <sup>2</sup>J<sub>HH</sub> = 12.6 Hz; ArCH<sub>2</sub>Ar), 3.81–3.77 (m, 4H; NCH<sub>2</sub>), 3.75 (d, 4H, <sup>2</sup>J<sub>HH</sub> = 15.8 Hz; ArCH<sub>2</sub>Ar), 3.72 (d, 4H, <sup>2</sup>J<sub>HH</sub> = 15.8 Hz; ArCH<sub>2</sub>Ar), 3.56–3.51 (m, 4H; OCH<sub>2</sub>CH<sub>2</sub>), 3.28 (d, 4H, <sup>2</sup>J<sub>HH</sub> = 12.6 Hz; ArCH<sub>2</sub>Ar), 2.15–2.06 (m, 4H; CH<sub>2</sub>CH<sub>3</sub>), 1.71–1.62 (m, 4H; CH<sub>2</sub>CH<sub>3</sub>), 1.38 (s, 18H; C(CH<sub>3</sub>)<sub>3</sub>), 1.10 (t, 6H,

$^3J_{\text{HH}} = 7.2 \text{ Hz}$ ;  $\text{CH}_3$ ), 0.88 (t, 6H,  $^3J_{\text{HH}} = 7.4 \text{ Hz}$ ;  $\text{CH}_3$ ), 0.85 (s, 18H;  $\text{C}(\text{CH}_3)_3$ ) ppm. ESI-MS  $m/z$ : 1456.8804  $[\text{M}+\text{H}]^+$  for  $\text{C}_{94}\text{H}_{115}\text{N}_6\text{O}_8$  (1456.8804).

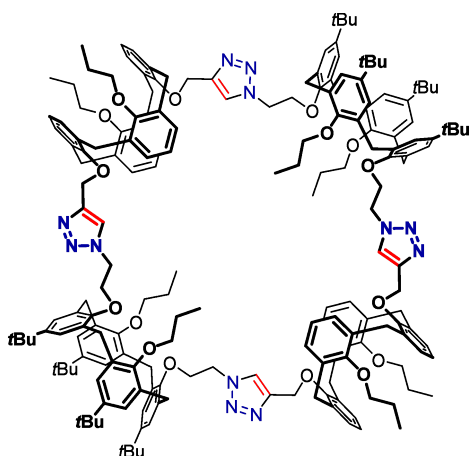

*Tetrakis(calix[4]arene) C<sub>2</sub>E<sub>2</sub>* was isolated as the more polar product during chromatographic purification of calix[4]semitube **CE**. Yield 0.054 g (11%), white solid. M.p. 243–245 °C.  $^1\text{H}$  NMR (600 MHz,  $\text{CDCl}_3$ ):  $\delta = 7.10$  (s, 4H; ArH), 7.08 (s, 2H;  $\text{ArH}_{\text{Trz}}$ ), 6.99 (d, 4H,  $^3J_{\text{HH}} = 7.4 \text{ Hz}$ ; ArH), 6.74 (t, 2H,  $^3J_{\text{HH}} = 7.4 \text{ Hz}$ ; ArH), 6.62 (d, 4H,  $^3J_{\text{HH}} = 7.5 \text{ Hz}$ ; ArH), 6.51 (s, 4H; ArH), 6.02 (t, 2H,  $^3J_{\text{HH}} = 7.5 \text{ Hz}$ ; ArH), 5.28–5.22 (m, 4H;  $\text{OCH}_2\text{CH}_2$ ), 4.71 (s, 4H;  $\text{OCH}_2\text{Trz}$ ), 4.68–4.62 (m, 4H;  $\text{OCH}_2\text{CH}_2$ ), 4.47 (d, 4H,

$^2J_{\text{HH}} = 12.7 \text{ Hz}$ ;  $\text{ArCH}_2\text{Ar}$ ), 3.81–3.75 (m, 4H;  $\text{NCH}_2$ ), 3.60 (d, 4H,  $^2J_{\text{HH}} = 14.8 \text{ Hz}$ ;  $\text{ArCH}_2\text{Ar}$ ), 3.50 (d, 4H,  $^2J_{\text{HH}} = 14.8 \text{ Hz}$ ;  $\text{ArCH}_2\text{Ar}$ ), 3.38–3.33 (m, 4H;  $\text{OCH}_2\text{CH}_2$ ), 3.20 (d, 4H,  $^2J_{\text{HH}} = 12.7 \text{ Hz}$ ;  $\text{ArCH}_2\text{Ar}$ ), 1.96–1.87 (m, 4H;  $\text{CH}_2\text{CH}_3$ ), 1.51–1.43 (m, 4H;  $\text{CH}_2\text{CH}_3$ ), 1.30 (s, 18H;  $\text{C}(\text{CH}_3)_3$ ), 0.86 (t, 6H,  $^3J_{\text{HH}} = 7.4 \text{ Hz}$ ;  $\text{CH}_3$ ), 0.85 (s, 18H;  $\text{C}(\text{CH}_3)_3$ ), 0.78 (t, 6H,  $^3J_{\text{HH}} = 7.3 \text{ Hz}$ ;  $\text{CH}_3$ ) ppm;  $^{13}\text{C}$  NMR (100 MHz,  $\text{CDCl}_3$ ):  $\delta = 156.34, 155.54, 153.88, 152.18, 145.72, 144.33$  ( $\text{C}_{\text{Ar}}$ ), 144.21 ( $\text{C}_{\text{Ar Trz}}$ ), 135.03, 134.18, 133.36, 131.91 ( $\text{C}_{\text{Ar}}$ ), 129.73, 129.69, 125.70, 124.66 ( $\text{CH}_{\text{Ar}}$ ), 123.10 ( $\text{CH}_{\text{Ar Trz}}$ ), 122.36, 121.58 ( $\text{CH}_{\text{Ar}}$ ), 77.88, 72.96, 72.47, 64.88 ( $\text{OCH}_2$ ), 49.91 ( $\text{NCH}_2$ ), 36.74 ( $\text{ArCH}_2\text{Ar}$ ), 34.09, 33.60 ( $\text{C}(\text{CH}_3)_3$ ), 31.66 ( $\text{C}(\text{CH}_3)_3$ ), 31.78 ( $\text{ArCH}_2\text{Ar}$ ), 31.12 ( $\text{C}(\text{CH}_3)_3$ ), 23.45, 23.32 ( $\text{CH}_2\text{CH}_3$ ), 10.44, 10.29 ( $\text{CH}_3$ ) ppm. ESI-MS  $m/z$ : 1456.8808  $[\text{M}+2\text{H}]^{2+}$  for  $\text{C}_{188}\text{H}_{230}\text{N}_{12}\text{O}_{16}$  (1456.8804).

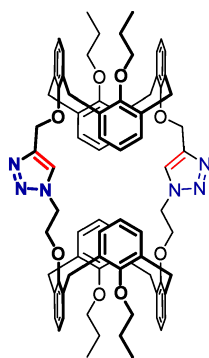

*Calix[4]semitube CF* was prepared according to *General procedure* from calixarene **C** (0.199 g, 0.34 mmol), calixarene **F** (0.220 g, 0.34 mmol),  $\text{CuSO}_4 \cdot 5\text{H}_2\text{O}$  (0.054 g, 0.34 mmol) and sodium ascorbate (0.134 g, 0.68 mmol) in THF (40 ml) and  $\text{H}_2\text{O}$  (8 ml). The reaction mixture was stirred at 60 °C for 24 h. Column: gradient from dichloromethane to dichloromethane/ethanol (50:1). Yield 0.166 g (40%), white solid. M.p. >250 °C.  $^1\text{H}$  NMR (400 MHz,  $\text{CDCl}_3$ ):  $\delta = 7.08$  (d, 4H,  $^3J_{\text{HH}} = 7.5 \text{ Hz}$ ; ArH), 7.05 (d, 4H,  $^3J_{\text{HH}} = 7.5 \text{ Hz}$ ; ArH),

6.98 (d, 4H,  $^3J_{\text{HH}} = 7.5 \text{ Hz}$ ; ArH), 6.90 (t, 2H,  $^3J_{\text{HH}} = 7.5 \text{ Hz}$ ; ArH), 6.87 (t, 2H,  $^3J_{\text{HH}} = 7.5 \text{ Hz}$ ; ArH), 6.80 (d, 4H,  $^3J_{\text{HH}} = 7.5 \text{ Hz}$ ; ArH), 6.71 (t, 2H,  $^3J_{\text{HH}} = 7.5 \text{ Hz}$ ; ArH), 6.37 (t, 2H,  $^3J_{\text{HH}} = 7.5 \text{ Hz}$ ; ArH), 6.26 (s, 2H;  $\text{ArH}_{\text{Trz}}$ ), 4.81 (s, 4H;  $\text{OCH}_2\text{Trz}$ ), 4.30–4.23 (m, 4H;  $\text{NCH}_2$ ), 4.09–4.03 (m, 4H;

NCH<sub>2</sub>CH<sub>2</sub>), 3.92 (d, 4H, <sup>2</sup>J<sub>HH</sub> = 16.4 Hz; ArCH<sub>2</sub>Ar), 3.48 (d, 4H, <sup>2</sup>J<sub>HH</sub> = 16.4 Hz; ArCH<sub>2</sub>Ar), 3.78 (d, 4H, <sup>2</sup>J<sub>HH</sub> = 15.7 Hz; ArCH<sub>2</sub>Ar), 3.61 (d, 4H, <sup>2</sup>J<sub>HH</sub> = 15.7 Hz; ArCH<sub>2</sub>Ar), 3.42–3.33 (m, 8H; OCH<sub>2</sub>CH<sub>2</sub>CH<sub>3</sub>), 1.44–1.31 (m, 4H; CH<sub>2</sub>CH<sub>3</sub>), 1.21–1.09 (m, 4H; CH<sub>2</sub>CH<sub>3</sub>), 0.71 (t, 6H, <sup>3</sup>J<sub>HH</sub> = 7.5 Hz; CH<sub>3</sub>), 0.68 (t, 6H, <sup>3</sup>J<sub>HH</sub> = 7.5 Hz; CH<sub>3</sub>) ppm; <sup>13</sup>C NMR (100 MHz, CDCl<sub>3</sub>): δ = 157.22, 156.93, 155.62, 154.92 (C<sub>Ar</sub>), 144.39 (C<sub>Ar</sub> Trz), 134.38, 134.37, 134.05, 133.38 (C<sub>Ar</sub>), 129.90, 129.87, 129.29, 128.46 (CH<sub>Ar</sub>), 124.12 (CH<sub>Ar</sub> Trz)\*, 123.24, 123.01, 122.42, 121.13 (CH<sub>Ar</sub>), 71.94, 71.47, 68.35, 63.57 (OCH<sub>2</sub>), 48.69 (NCH<sub>2</sub>), 38.34, 37.97 (ArCH<sub>2</sub>Ar), 22.98, 22.21 (CH<sub>2</sub>CH<sub>3</sub>), 10.10, 9.92 (CH<sub>3</sub>) ppm. ESI-MS *m/z*: 1231.6269 [M+H]<sup>+</sup> for C<sub>78</sub>H<sub>83</sub>N<sub>6</sub>O<sub>8</sub> (1231.6267).

## Tuning the conditions for the preparation of calix[4]semitubes

Table S1 Different catalytic systems used in the CuAAC reactions between calixarenes **A** and **D**

| Entry | Catalyst (equiv per bis(azlkyne)/bis(azide))                | External ligand (equiv per Cu)    | Solvent                         | Temp., °C | Time, h | Reaction outcome |    |         |                |
|-------|-------------------------------------------------------------|-----------------------------------|---------------------------------|-----------|---------|------------------|----|---------|----------------|
|       |                                                             |                                   |                                 |           |         | A or D           | AD | Polymer | Other products |
| 1     | CuI·P(OEt) <sub>3</sub> (0.3)                               | –                                 | toluene                         | 110       | 1       | +                | +  | +       | –              |
| 2     | CuI·P(OEt) <sub>3</sub> (3.0)                               | –                                 | toluene                         | 110       | 1       | –                | +  | +       | –              |
| 3     | CuI (0.3)                                                   | –                                 | toluene                         | 110       | 2       | +                | –  | –       | –              |
| 4     | CuI (0.3)                                                   | <i>i</i> Pr <sub>2</sub> EtN (20) | toluene                         | 110       | 1       | +                | +  | +       | –              |
| 5     | CuI (0.3)                                                   | TBTA (2.0)                        | toluene                         | 110       | 2       | –                | +  | +       | –              |
| 6     | CuI (1.0)                                                   | TBTA (2.0)                        | toluene                         | 110       | 2       | –                | +  | +       | –              |
| 7     | CuI (2.0)                                                   | TBTA (2.0)                        | toluene                         | 110       | 2       | –                | +  | +       | –              |
| 8     | CuSO <sub>4</sub> ·5H <sub>2</sub> O (0.3)/sodium ascorbate | –                                 | THF/H <sub>2</sub> O            | 65        | 7       | –                | +  | +       | –              |
| 9     | CuI (0.3)                                                   | <i>i</i> Pr <sub>2</sub> EtN (20) | toluene                         | rt        | 48      | +                | +  | +       | –              |
| 10    | CuI (0.3)                                                   | Et <sub>3</sub> N (20)            | toluene                         | rt        | 48      | –                | +  | +       | –              |
| 11    | CuI (0.3)                                                   | Et <sub>3</sub> N (20)            | CH <sub>2</sub> Cl <sub>2</sub> | rt        | 48      | –                | +  | +       | –              |
| 12    | CuI (0.3)                                                   | Et <sub>3</sub> N (20)            | benzene                         | rt        | 48      | –                | +  | +       | –              |
| 13    | CuI (0.3)                                                   | Et <sub>3</sub> N (20)            | CH <sub>3</sub> CN              | rt        | 48      | –                | –  | +       | +              |
| 14    | CuI (0.3)                                                   | Et <sub>3</sub> N (20)            | DMF                             | rt        | 48      | –                | –  | +       | +              |
| 15    | CuI (0.3)                                                   | –                                 | DMF                             | rt        | 48      | –                | –  | +       | –              |
| 16    | CuI (0.3)                                                   | TBTA (2.0)                        | toluene                         | rt        | 48      | –                | –  | +       | –              |
| 17    | CuI (1.0)                                                   | TBTA (2.0)                        | toluene                         | rt        | 48      | –                | –  | +       | –              |
| 18    | CuI (2.0)                                                   | TBTA (2.0)                        | toluene                         | rt        | 48      | –                | –  | +       | –              |
| 19    | CuI (0.05)                                                  | Et <sub>3</sub> N (20)            | toluene                         | rt        | 72      | +                | +  | +       | –              |
| 20    | CuCl (0.05)                                                 | Et <sub>3</sub> N (20)            | toluene                         | rt        | 72      | –                | +  | +       | +              |
| 21    | Cu(OAc) <sub>2</sub> (0.3)                                  | Et <sub>3</sub> N (20)            | toluene                         | rt        | 48      | –                | +  | +       | –              |
| 22    | Cu(OAc) <sub>2</sub> (0.3)                                  | Et <sub>3</sub> N (20)            | CH <sub>2</sub> Cl <sub>2</sub> | rt        | 48      | –                | +  | +       | –              |
| 23    | Cu(OAc) <sub>2</sub> (0.3)                                  | –                                 | CH <sub>2</sub> Cl <sub>2</sub> | rt        | 48      | +                | –  | –       | –              |
| 24    | [Cu(CH <sub>3</sub> CN) <sub>4</sub> ]PF <sub>6</sub> (0.3) | –                                 | toluene                         | rt        | 48      | +                | –  | –       | –              |
| 25    | [Cu(CH <sub>3</sub> CN) <sub>4</sub> ]PF <sub>6</sub> (0.3) | –                                 | CH <sub>3</sub> CN              | rt        | 48      | +                | –  | –       | –              |
| 26    | [Cu(CH <sub>3</sub> CN) <sub>4</sub> ]PF <sub>6</sub> (0.3) | Et <sub>3</sub> N (20)            | toluene                         | rt        | 48      | +                | –  | –       | –              |
| 27    | [Cu(CH <sub>3</sub> CN) <sub>4</sub> ]PF <sub>6</sub> (0.3) | Et <sub>3</sub> N (20)            | CH <sub>3</sub> CN              | rt        | 48      | –                | –  | +       | +              |
| 28    | [Cu(CH <sub>3</sub> CN) <sub>4</sub> ]PF <sub>6</sub> (0.3) | Et <sub>3</sub> N (20)            | toluene                         | 100       | 2       | +                | –  | –       | –              |
| 29    | [Cu(CH <sub>3</sub> CN) <sub>4</sub> ]PF <sub>6</sub> (1.0) | Et <sub>3</sub> N (20)            | toluene                         | 100       | 2       | +                | –  | –       | –              |
| 30    | [( <i>i</i> Pr)CuCl] (0.3)                                  | –                                 | CH <sub>2</sub> Cl <sub>2</sub> | rt        | 48      | +                | –  | –       | –              |
| 31    | [( <i>i</i> Pr)CuCl] (0.3)                                  | Et <sub>3</sub> N (20)            | CH <sub>2</sub> Cl <sub>2</sub> | rt        | 48      | +                | –  | –       | –              |

Table S2 Tuning the CuI/Et<sub>3</sub>N/toluene catalytic system for the preparation of the calix[4]semitube **AD**

| Entry | Catalyst loading, equiv per bis(azlkyne)/bis(azide) | Et <sub>3</sub> N/Cu molar ratio | Temp., °C | Time, h | Reaction outcome |           |         |                |
|-------|-----------------------------------------------------|----------------------------------|-----------|---------|------------------|-----------|---------|----------------|
|       |                                                     |                                  |           |         | <b>A or D</b>    | <b>AD</b> | Polymer | Other products |
| 1     | 0.01                                                | 20                               | 100       | 2       | -                | +         | +       | -              |
| 2     | 0.05                                                | 20                               | 100       | 2       | -                | +         | +       | -              |
| 3     | 0.30                                                | 20                               | 100       | 2       | -                | +         | +       | -              |
| 4     | 1.00                                                | 20                               | 100       | 2       | -                | +         | +       | -              |
| 5     | 0.0005                                              | 20                               | rt        | 48      | +                | -         | -       | -              |
| 6     | 0.001                                               | 20                               | rt        | 48      | +                | -         | -       | -              |
| 7     | 0.005                                               | 20                               | rt        | 48      | +                | -         | -       | -              |
| 8     | 0.01                                                | 20                               | rt        | 48      | +                | -         | -       | -              |
| 9     | 0.30                                                | 20                               | rt        | 48      | -                | +         | +       | -              |
| 10    | 0.30                                                | 330                              | rt        | 48      | -                | +         | +       | -              |
| 11    | 1.00                                                | 20                               | rt        | 48      | -                | +         | +       | -              |
| 12    | 1.00                                                | 330                              | rt        | 48      | -                | +         | +       | -              |
| 13    | 2.00                                                | 20                               | rt        | 48      | -                | +         | +       | -              |
| 14    | 2.00                                                | 330                              | rt        | 48      | -                | +         | +       | +              |

Table S3 Tuning the CuI/Et<sub>3</sub>N/toluene catalytic system in the CuAAC between calixarenes **C** and **E**

| Entry | Catalyst (equiv per bis(azlkyne)/bis(azide)) | External ligand (equiv per Cu) | Solvent                    | Temp., °C | Time, h | Reaction outcome |           |         |                |
|-------|----------------------------------------------|--------------------------------|----------------------------|-----------|---------|------------------|-----------|---------|----------------|
|       |                                              |                                |                            |           |         | <b>C or E</b>    | <b>CD</b> | Polymer | Other products |
| 1     | CuI (0.3)                                    | Et <sub>3</sub> N (20)         | toluene                    | rt        | 48      | +                | +         | +       | -              |
| 2     | CuI (0.3)                                    | Et <sub>3</sub> N (400)        | toluene                    | 60        | 9       | -                | +         | +       | +              |
| 3     | CuI (1.0)                                    | Et <sub>3</sub> N (20)         | toluene/1,2-dichloroethane | rt        | 48      | -                | +         | ++      | +              |
| 4     | CuI (1.0)                                    | Et <sub>3</sub> N (20)         | toluene/1,2-dichloroethane | 60        | 9       | -                | +         | ++      | -              |
| 5     | CuI (1.0)                                    | Et <sub>3</sub> N (20)         | toluene                    | 60        | 9       | +                | +         | +       | +              |
| 6     | CuI (1.0)                                    | Et <sub>3</sub> N (20)         | 1,2-dichloroethane         | 60        | 9       | +                | +         | +       | -              |
| 7     | CuI (1.0)                                    | Et <sub>3</sub> N (20)         | DMF                        | 60        | 9       | +                | -         | +       | +              |

Table S4 Different catalytic systems tested in the CuAAC reactions between calixarenes **C** and **F**

| Entry | Catalyst (equiv per bis(alkyne)/bis(azide)) | External ligand (equiv per Cu) | Solvent                      | Temp., °C | Time, h | Reaction outcome |           |         |                |
|-------|---------------------------------------------|--------------------------------|------------------------------|-----------|---------|------------------|-----------|---------|----------------|
|       |                                             |                                |                              |           |         | <b>C or F</b>    | <b>CF</b> | Polymer | Other products |
| 1     | CuI (0.3)                                   | Et <sub>3</sub> N (20)         | toluene/1,2-dichloroethane   | rt        | 48      | +                | +         | +       | +              |
| 2     | CuI (1.0)                                   | Et <sub>3</sub> N (20)         | toluene/1,2-dichloroethane   | rt        | 48      | –                | +         | +       | +              |
| 3     | CuI (0.3)                                   | Et <sub>3</sub> N (20)         | toluene/1,2-dichloroethane   | 60        | 24      | –                | +         | +       | +              |
| 4     | CuI (1.0)                                   | Et <sub>3</sub> N (20)         | toluene/1,2-dichloroethane   | 60        | 24      | –                | +         | +       | +              |
| 5     | CuI (1.0)*                                  | Et <sub>3</sub> N (20)         | toluene/1,2-dichloroethane   | 60        | 24      | –                | +         | +       | +              |
| 6     | CuI (0.3)                                   | TBTA (2)                       | toluene/1,2-dichloroethane   | 60        | 24      | –                | +         | ++      | +              |
| 7     | CuI (1.0)                                   | TBTA (2)                       | toluene/1,2-dichloroethane   | 60        | 24      | –                | –         | ++      | +              |
| 8     | CuCl (1.0)                                  | –                              | toluene/1,2-dichloroethane   | 60        | 24      | –                | +         | ++      | +              |
| 9     | CuCl (1.0)                                  | Et <sub>3</sub> N (20)         | toluene/1,2-dichloroethane   | rt        | 48      | +                | –         | +       | –              |
| 10    | CuCl (1.0)                                  | Et <sub>3</sub> N (20)         | toluene/1,2-dichloroethane   | 60        | 24      | –                | –         | +       | +              |
| 11    | CuI·P(OEt) <sub>3</sub> (0.3)               | –                              | toluene/1,2-dichloroethane   | 60        | 24      | –                | +         | +       | +              |
| 12    | CuI·P(OEt) <sub>3</sub> (1.0)               | –                              | toluene/1,2-dichloroethane   | 60        | 24      | –                | +         | +       | +              |
| 13    | CuSO <sub>4</sub> /Na asc. (0.3)            | –                              | THF/H <sub>2</sub> O (5:1)   | 60        | 24      | –                | +         | +       | +              |
| 14    | CuSO <sub>4</sub> /Na asc. (1.0)            | –                              | THF/H <sub>2</sub> O (5:1)   | rt        | 48      | +                | ++        | +       | –              |
| 15    | CuSO <sub>4</sub> /Na asc. (1.0)            | –                              | THF/H <sub>2</sub> O (5:1)   | 60        | 6       | +                | ++        | +       | –              |
| 16    | CuSO <sub>4</sub> /Na asc. (1.0)            | –                              | THF/H <sub>2</sub> O (5:1)   | 60        | 24      | –                | ++        | +       | –              |
| 17    | CuSO <sub>4</sub> /Na asc. (1.0)            | –                              | THF/H <sub>2</sub> O (5:1)** | 60        | 24      | +                | –         | –       | +              |
| 18    | CuSO <sub>4</sub> /Na asc. (1.0)            | TBTA (2)                       | THF/H <sub>2</sub> O (5:1)   | 60        | 24      | –                | –         | +       | +              |
| 19    | CuSO <sub>4</sub> /Na asc. (2.0)            | –                              | THF/H <sub>2</sub> O (5:1)   | 60        | 24      | –                | +         | +       | +              |

\* – the bis(alkyne) **C** was pre-reacted with the copper catalyst for 12 h at rt;

\*\* – the reaction was conducted in a diluted solution (5 volumes of the solvent were used).

Table S5 Testing the catalytic system CuSO<sub>4</sub>·5H<sub>2</sub>O (1.0 equiv)/Na asc., THF/H<sub>2</sub>O (5:1), 60 °C, 24 h for the preparation of bis(calixarenes) **AE**, **AF**, **BD**, **BE**, **BF**, **CD** and **CE**

| Entry | Starting calixarenes | Reaction outcome  |                 |         |                |
|-------|----------------------|-------------------|-----------------|---------|----------------|
|       |                      | Starting material | Bis(calixarene) | Polymer | Other products |
| 1     | <b>A + E</b>         | –                 | +               | +       | –              |
| 2     | <b>A + F</b>         | –                 | +               | +       | –              |
| 3     | <b>B + D</b>         | +                 | –               | –       | +              |
| 4     | <b>B + E</b>         | +                 | –               | –       | –              |
| 5     | <b>B + F</b>         | +                 | +               | +       | –              |
| 6     | <b>C + D</b>         | –                 | +               | ++      | –              |
| 7     | <b>C + E</b>         | –                 | +               | ++      | +              |

## NMR spectra of novel compounds

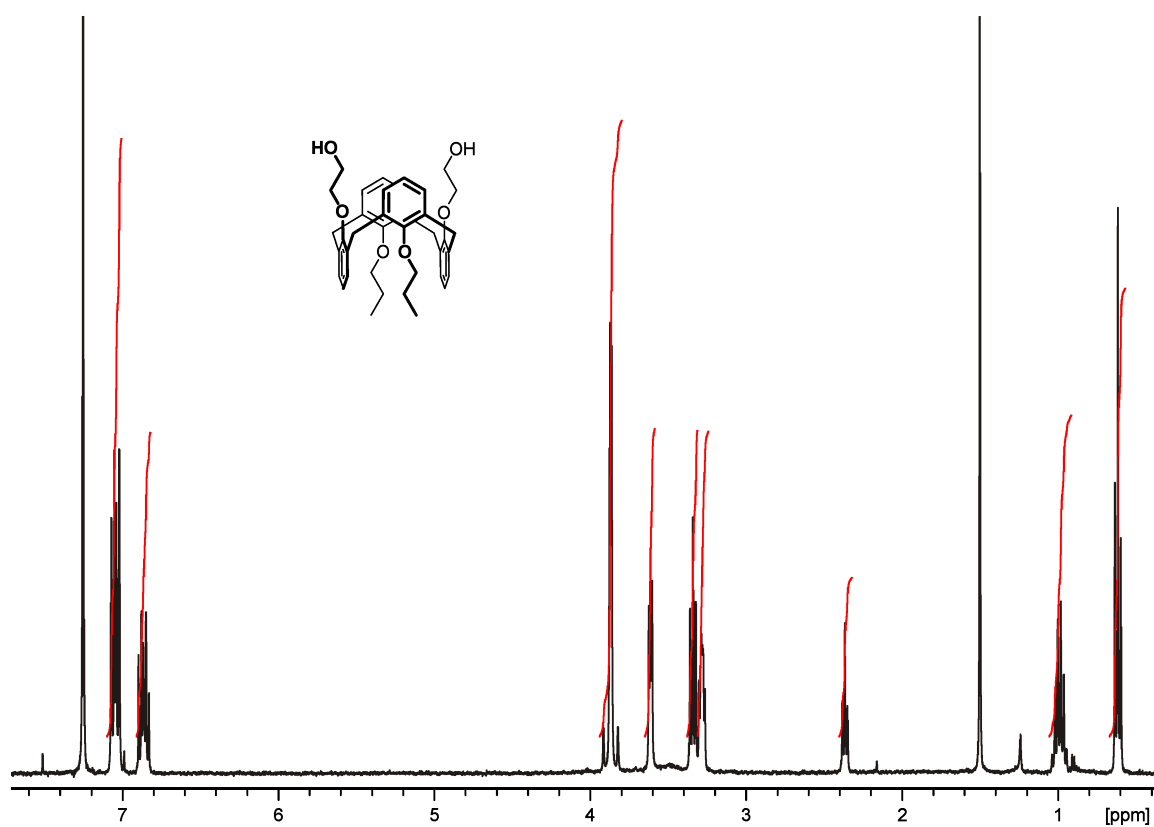

Figure S1. <sup>1</sup>H NMR spectrum of calixarene 4 (400 MHz, CDCl<sub>3</sub>).

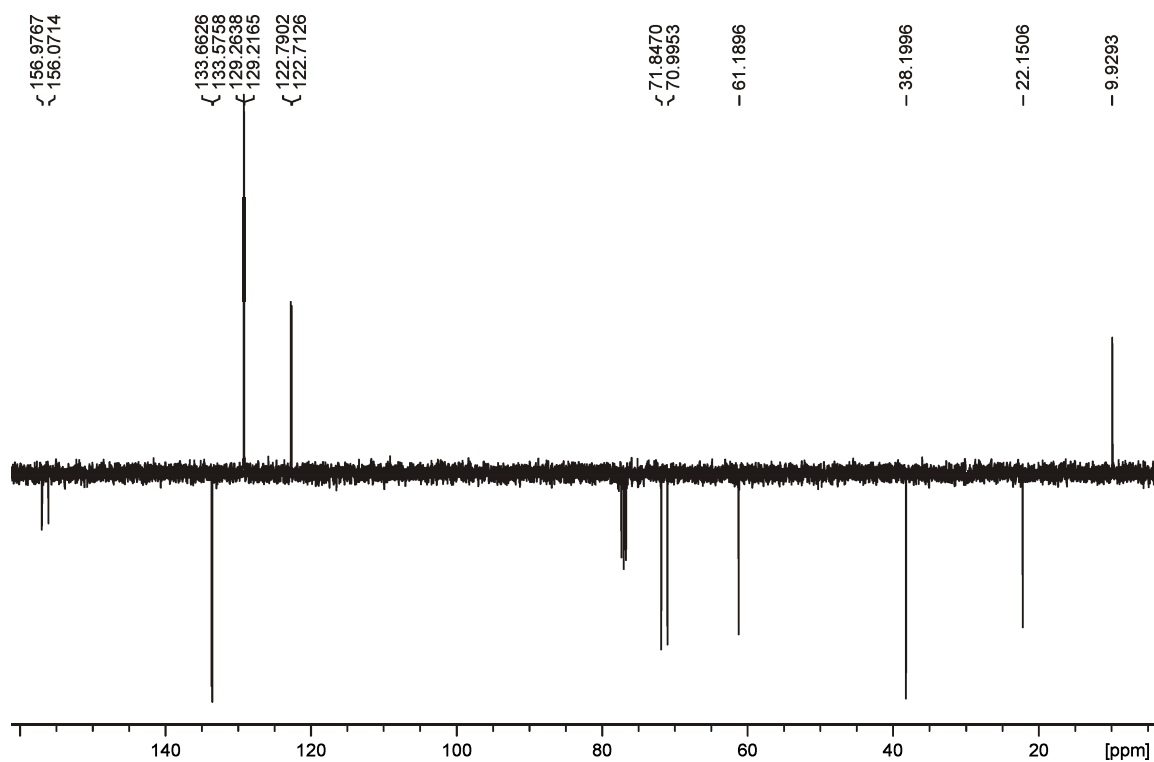

Figure S2. <sup>13</sup>C NMR spectrum (APT) of calixarene 4 (100 MHz, CDCl<sub>3</sub>).

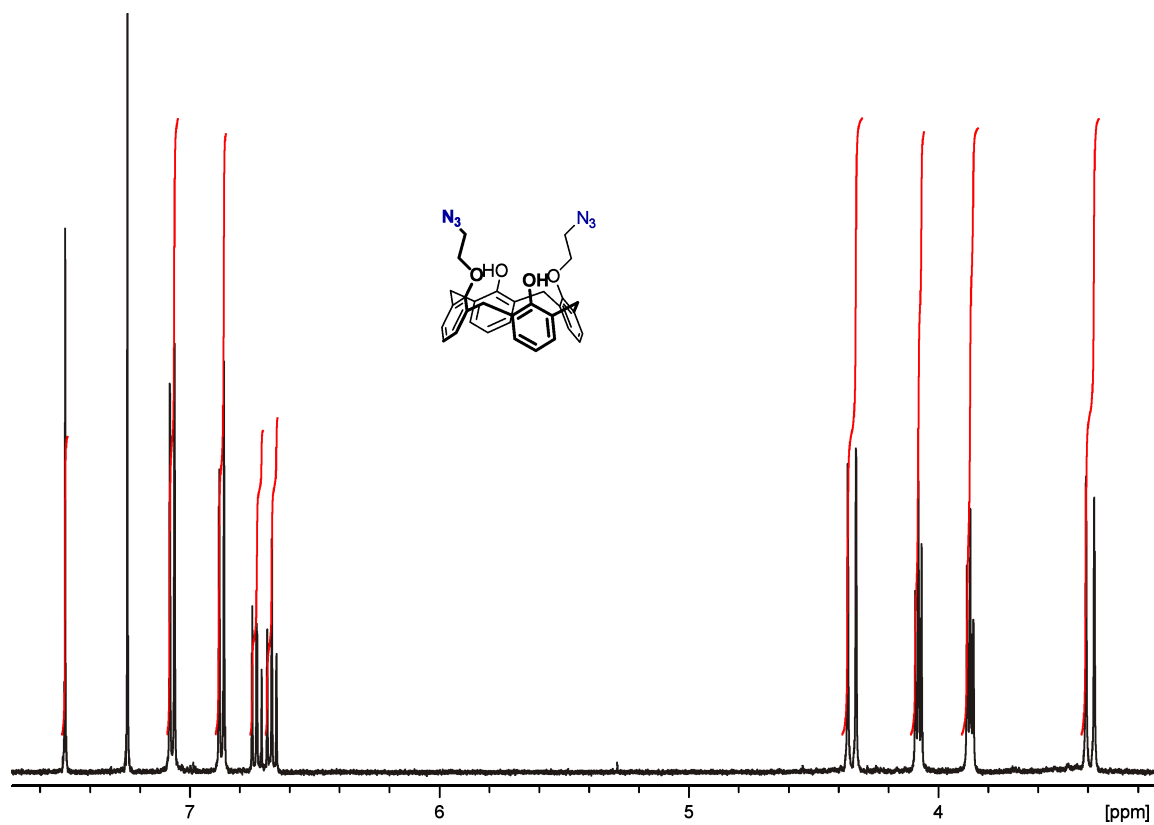

**Figure S3.** <sup>1</sup>H NMR spectrum of calixarene **6** (400 MHz, CDCl<sub>3</sub>).

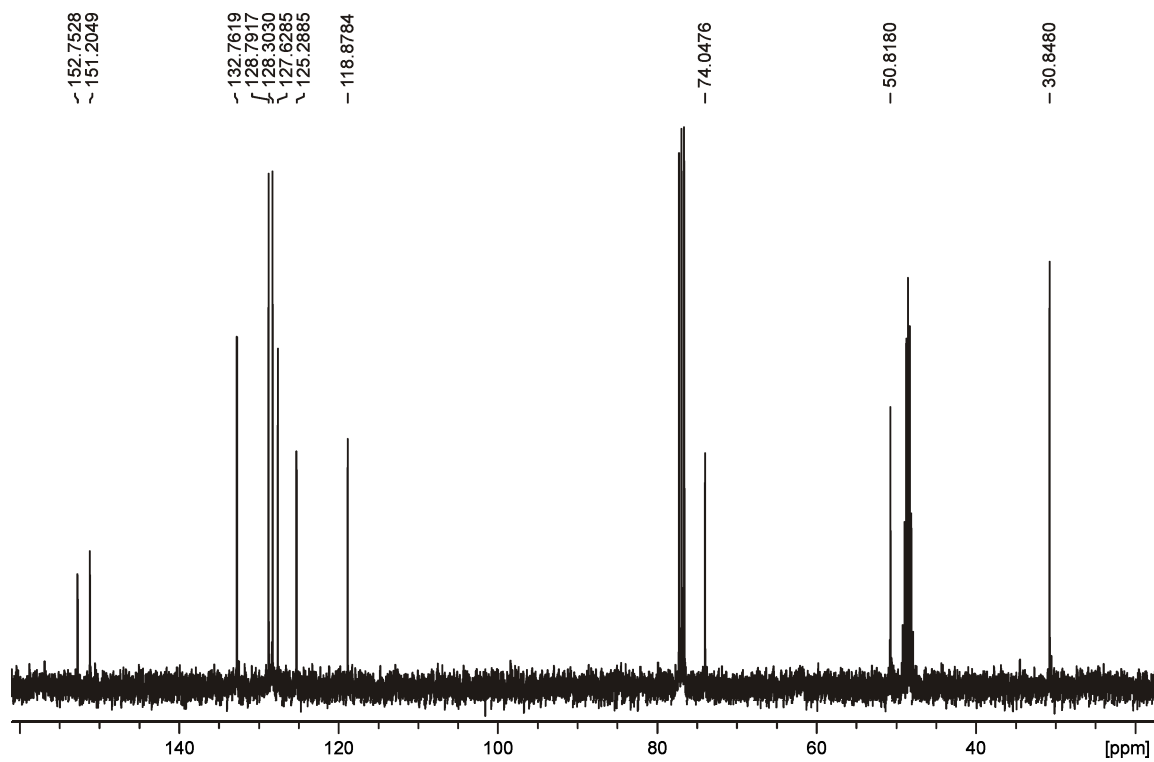

**Figure S4.** <sup>13</sup>C NMR spectrum of calixarene **6** (100 MHz, CDCl<sub>3</sub>+CD<sub>3</sub>OD).



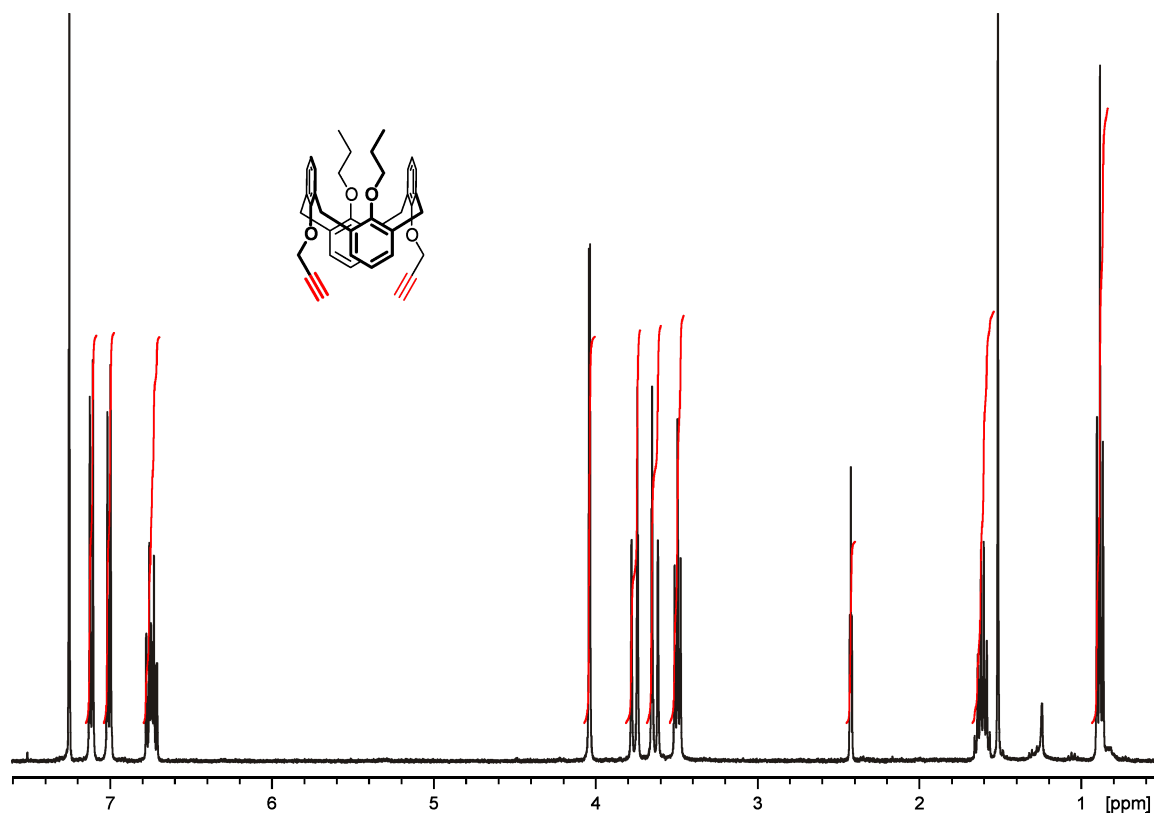

**Figure S5.** <sup>1</sup>H NMR spectrum of calixarene C (400 MHz, CDCl<sub>3</sub>).

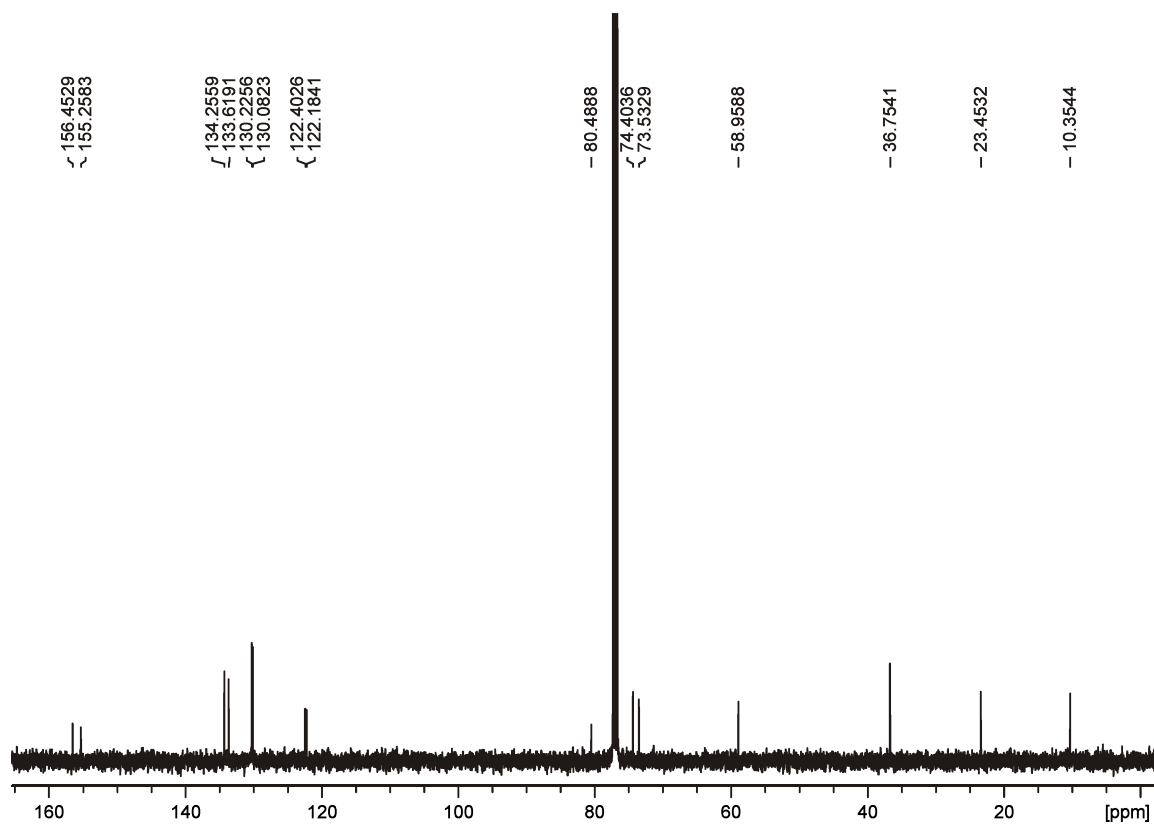

**Figure S6.** <sup>13</sup>C NMR spectrum of calixarene C (100 MHz, CDCl<sub>3</sub>).

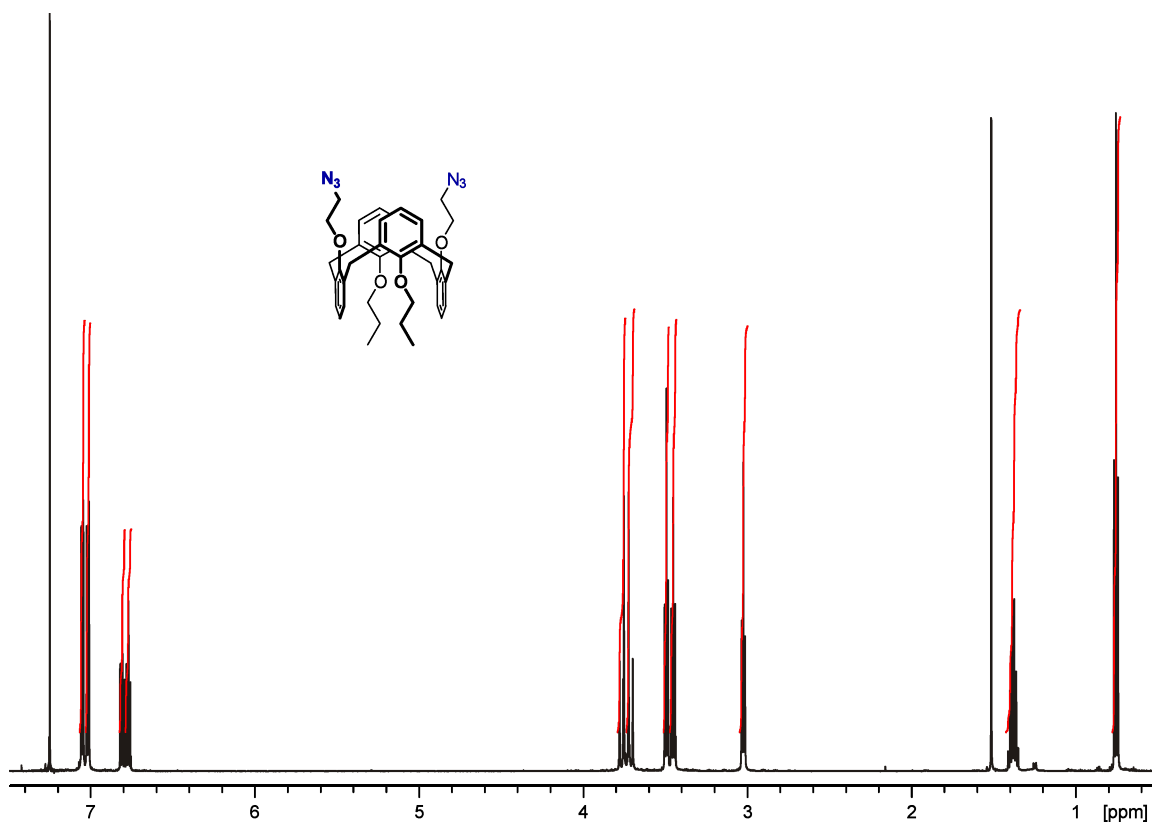

**Figure S7.**  $^1\text{H}$  NMR spectrum of calixarene **F** (600 MHz,  $\text{CDCl}_3$ ).

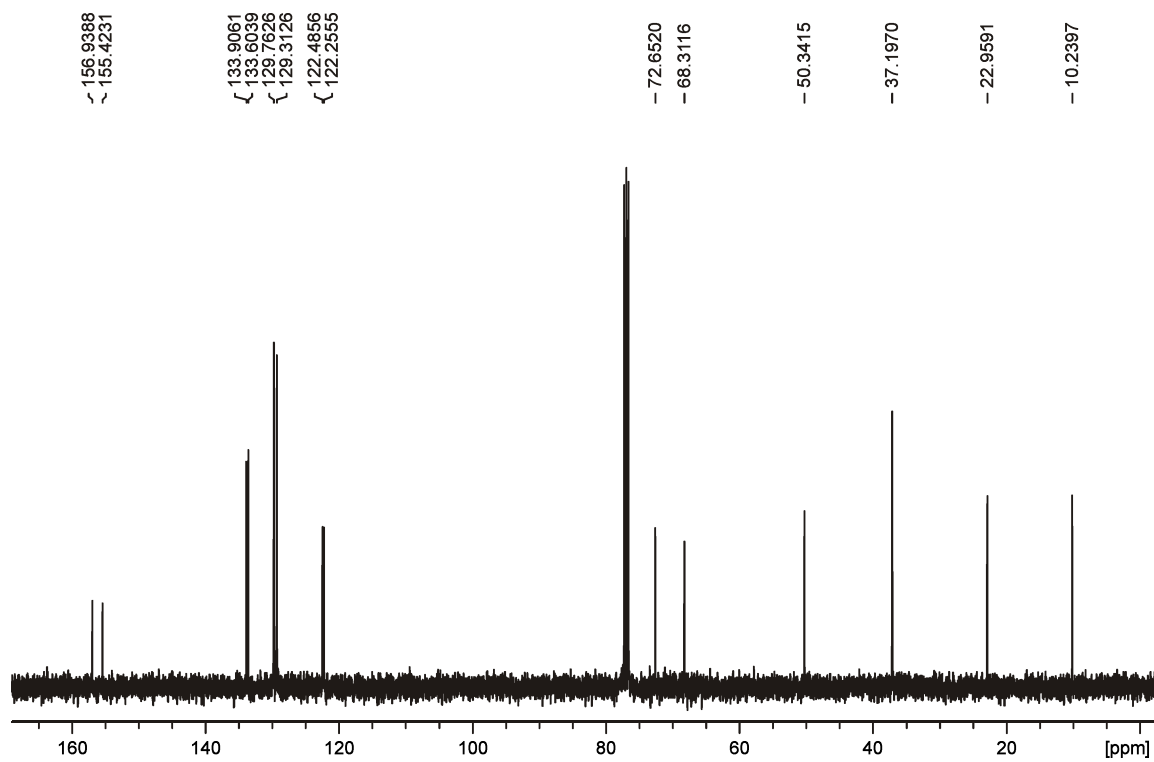

**Figure S8.**  $^{13}\text{C}$  NMR spectrum of calixarene **F** (100 MHz,  $\text{CDCl}_3$ ).

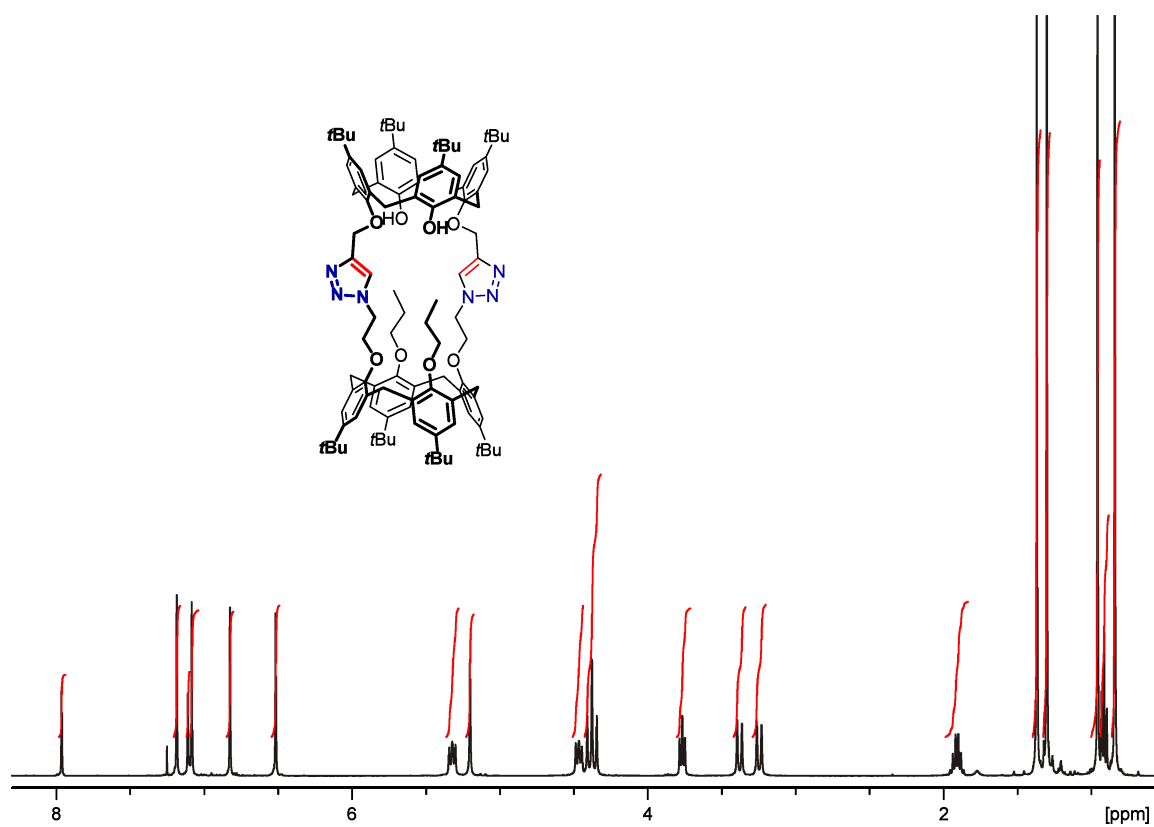

**Figure S9.**  $^1\text{H}$  NMR spectrum of calix[4]semitube AE (400 MHz,  $\text{CDCl}_3$ ).

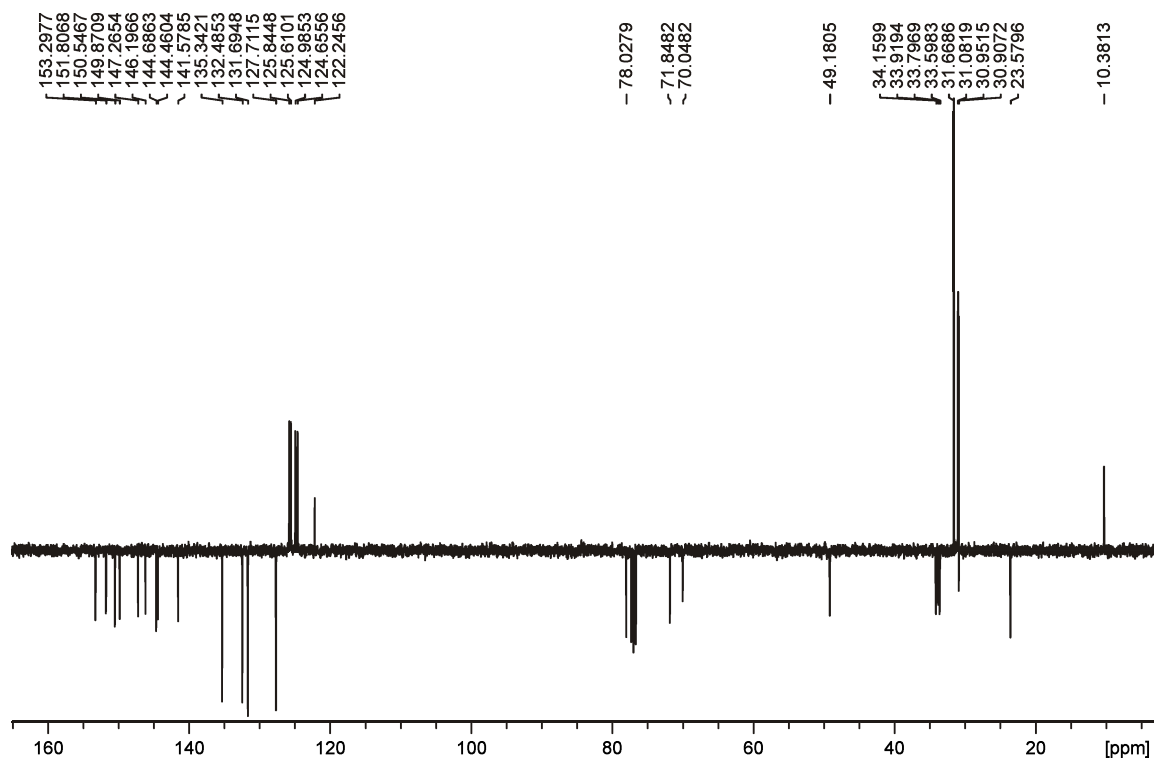

**Figure S10.**  $^{13}\text{C}$  NMR spectrum (APT) of calix[4]semitube AE (100 MHz,  $\text{CDCl}_3$ ).

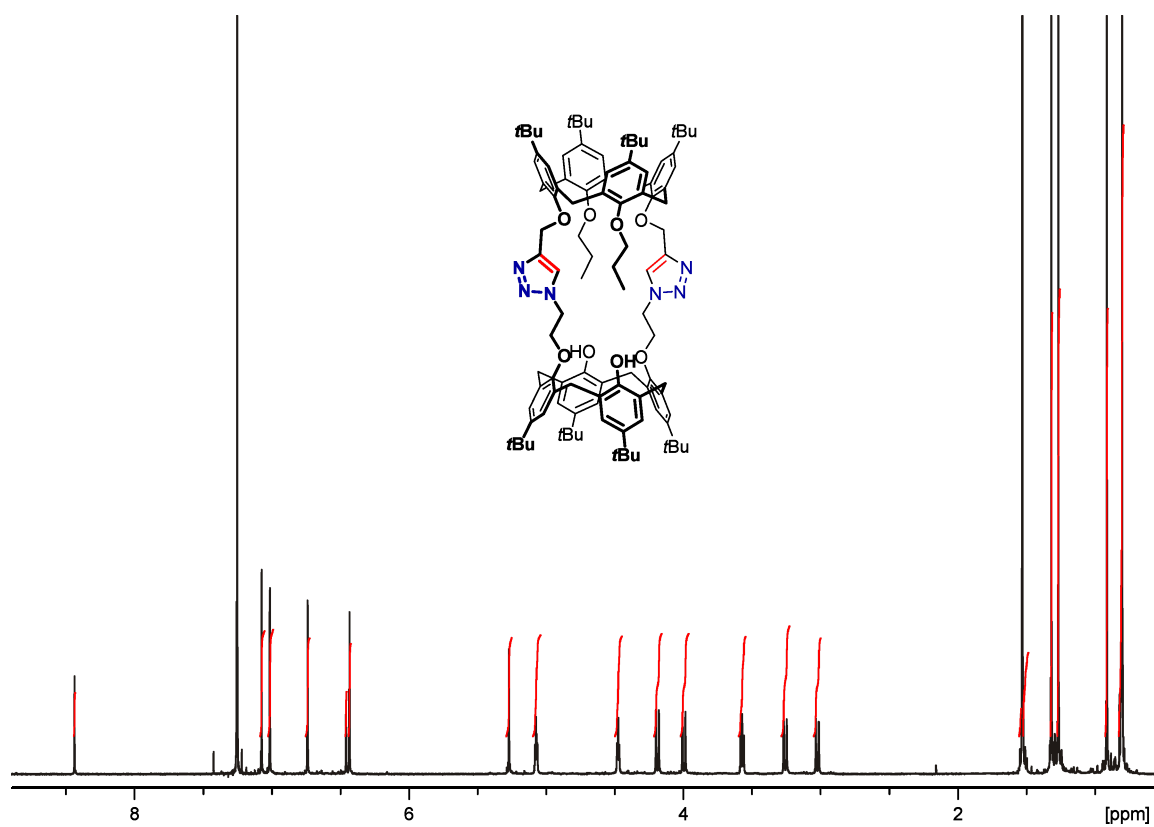

**Figure S11.** <sup>1</sup>H NMR spectrum of calix[4]semitube **BD** (600 MHz, CDCl<sub>3</sub>).

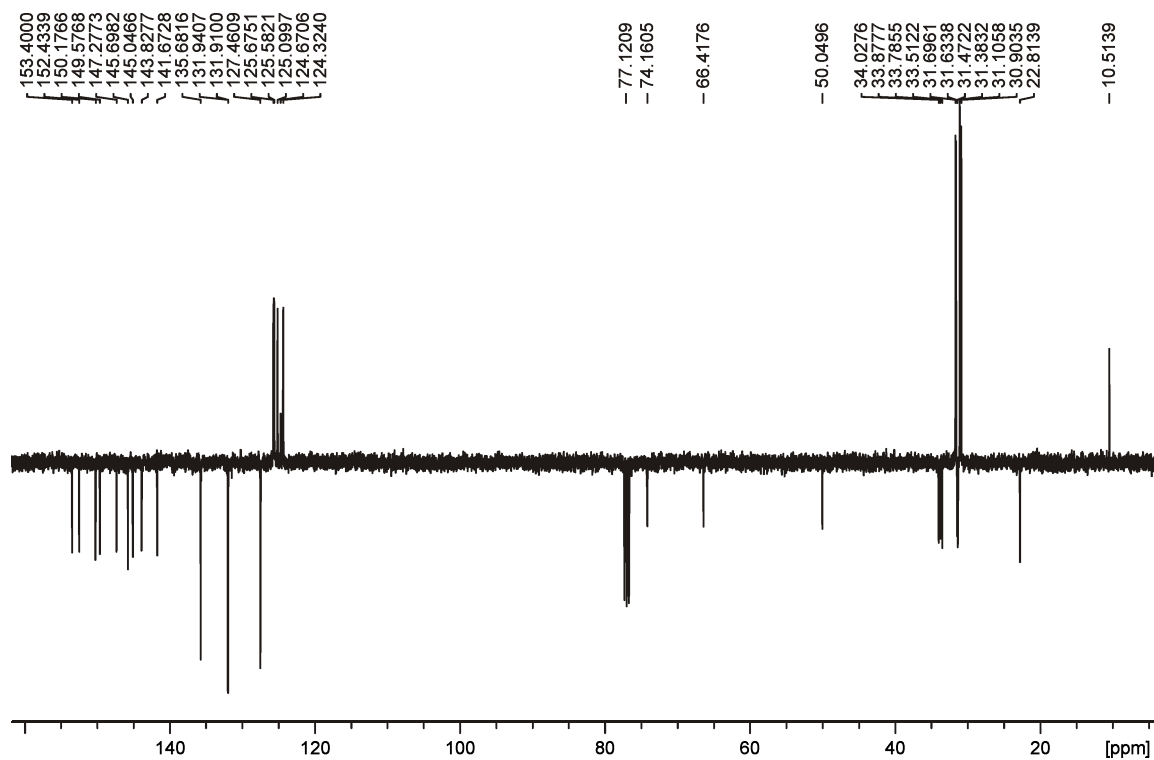

**Figure S12.** <sup>13</sup>C NMR spectrum (APT) of calix[4]semitube **BD** (100 MHz, CDCl<sub>3</sub>).

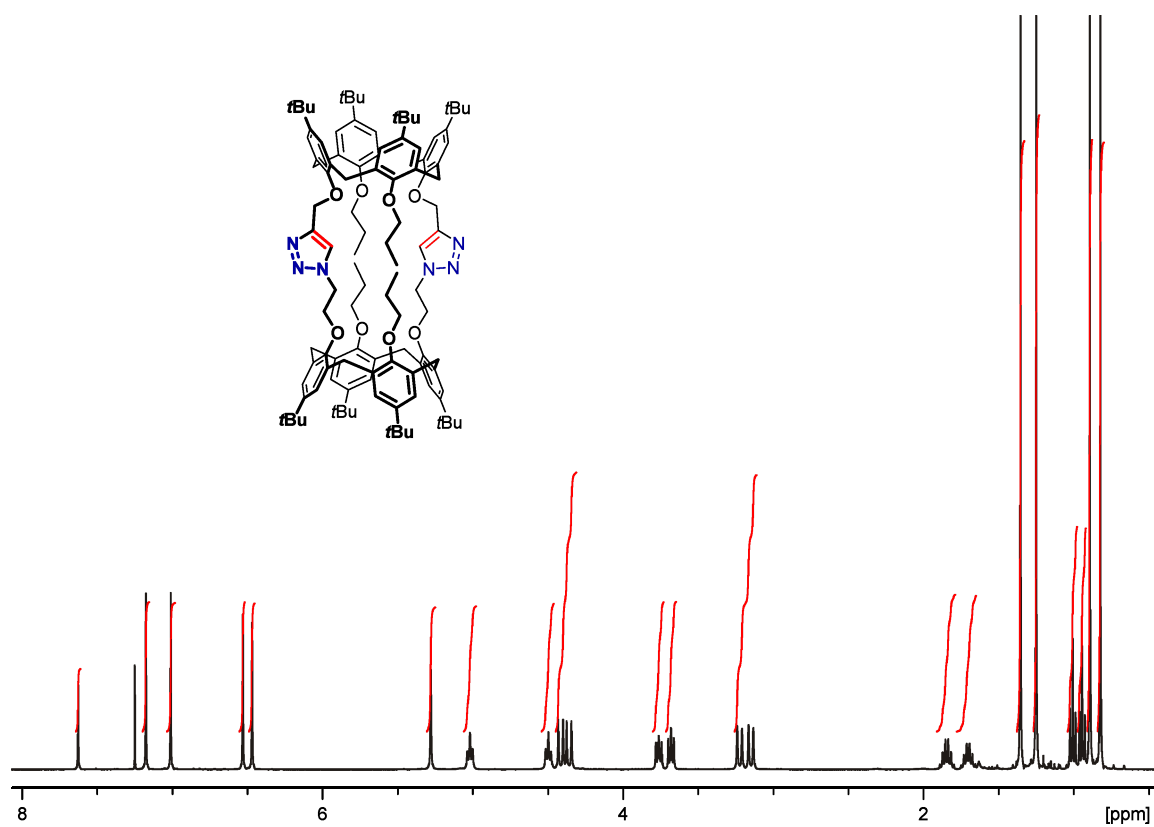

**Figure S13.**  $^1\text{H}$  NMR spectrum of calix[4]semitube **BE** (400 MHz,  $\text{CDCl}_3$ ).

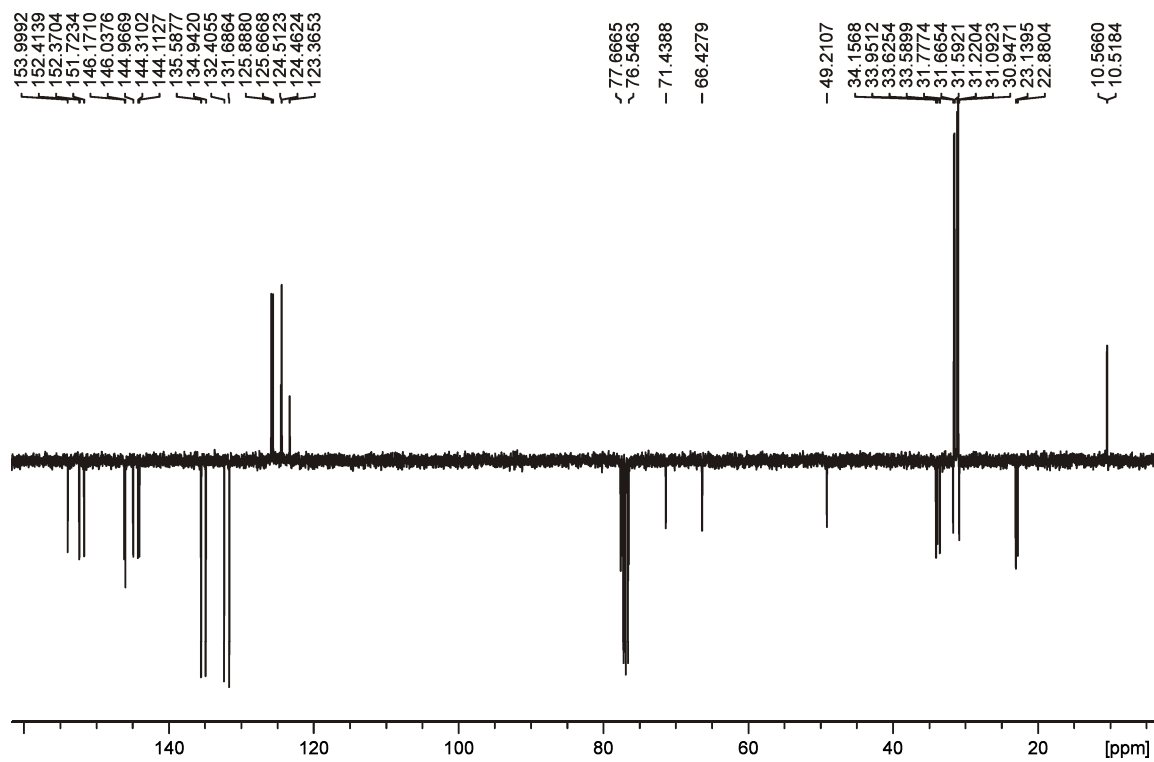

**Figure S14.**  $^{13}\text{C}$  NMR spectrum (APT) of calix[4]semitube **BE** (100 MHz,  $\text{CDCl}_3$ ).

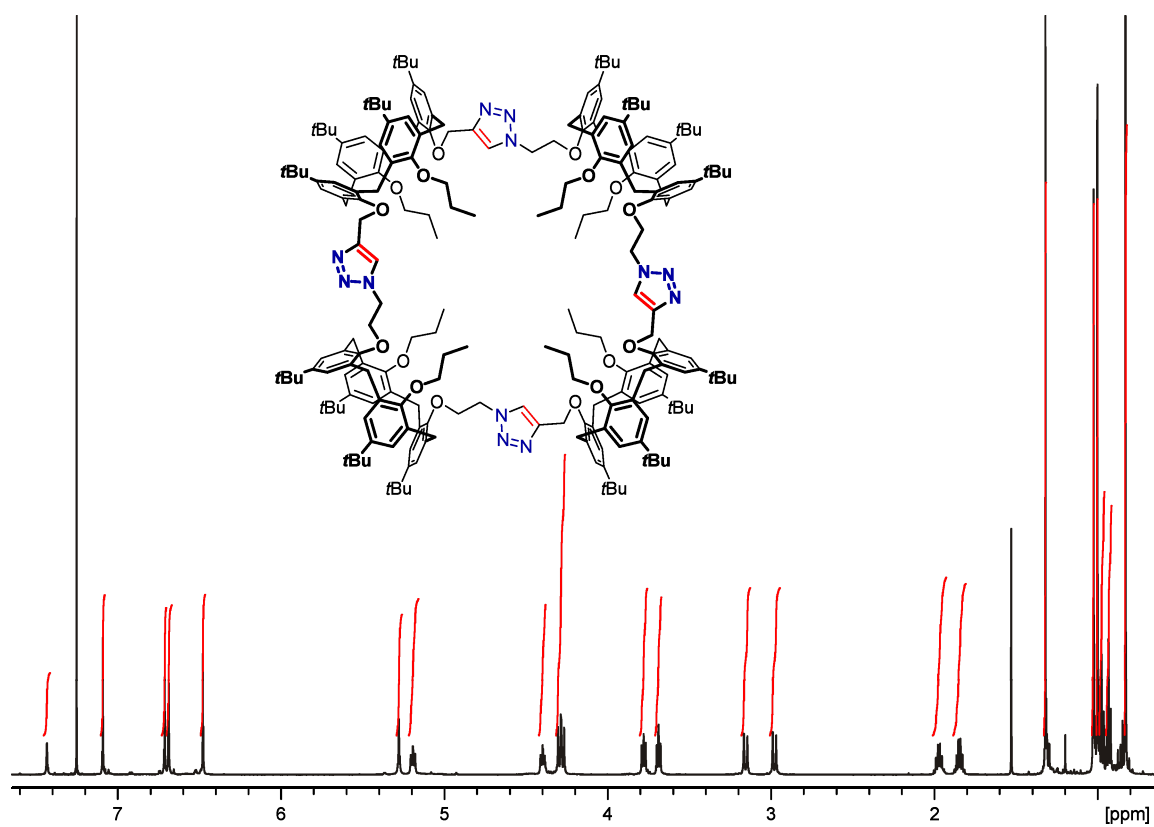

Figure S15. <sup>1</sup>H NMR spectrum of tetrakis(calix[4]arene) **B**<sub>2</sub>**E**<sub>2</sub> (600 MHz, CDCl<sub>3</sub>).

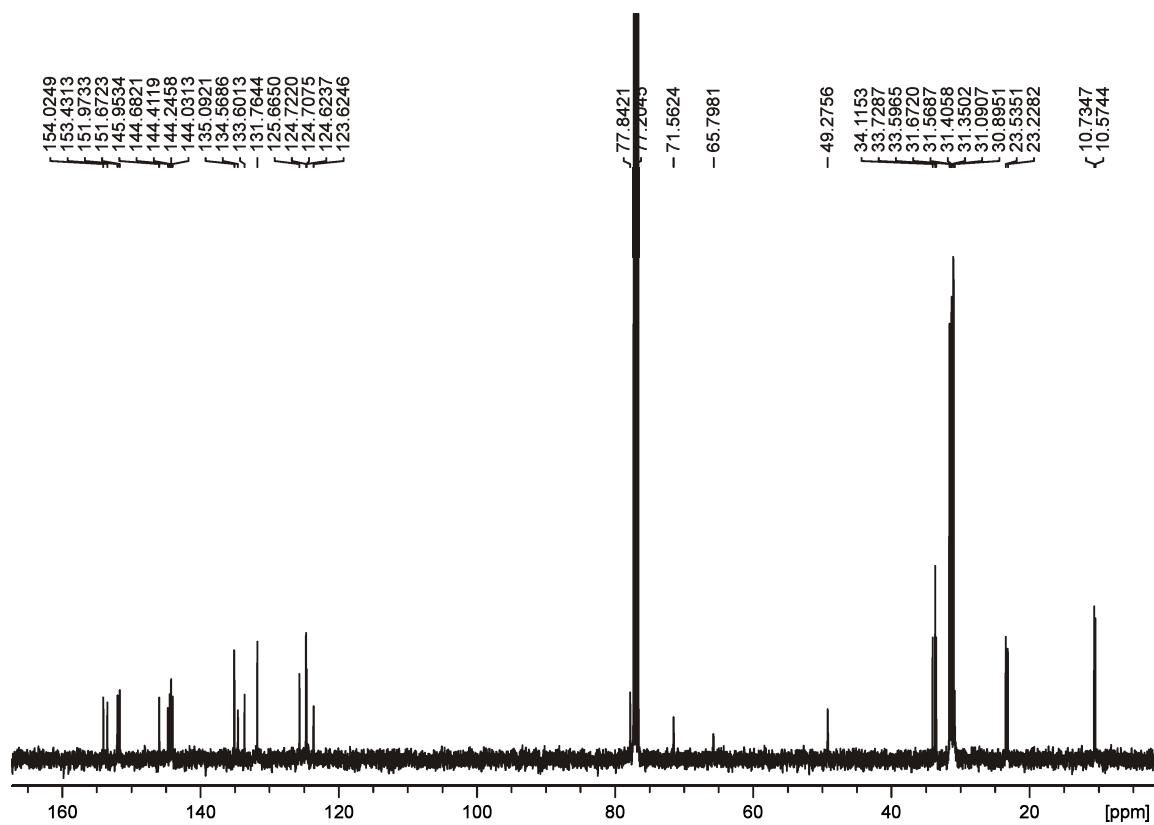

Figure S16. <sup>13</sup>C NMR spectrum of tetrakis(calix[4]arene) **B**<sub>2</sub>**E**<sub>2</sub> (100 MHz, CDCl<sub>3</sub>).

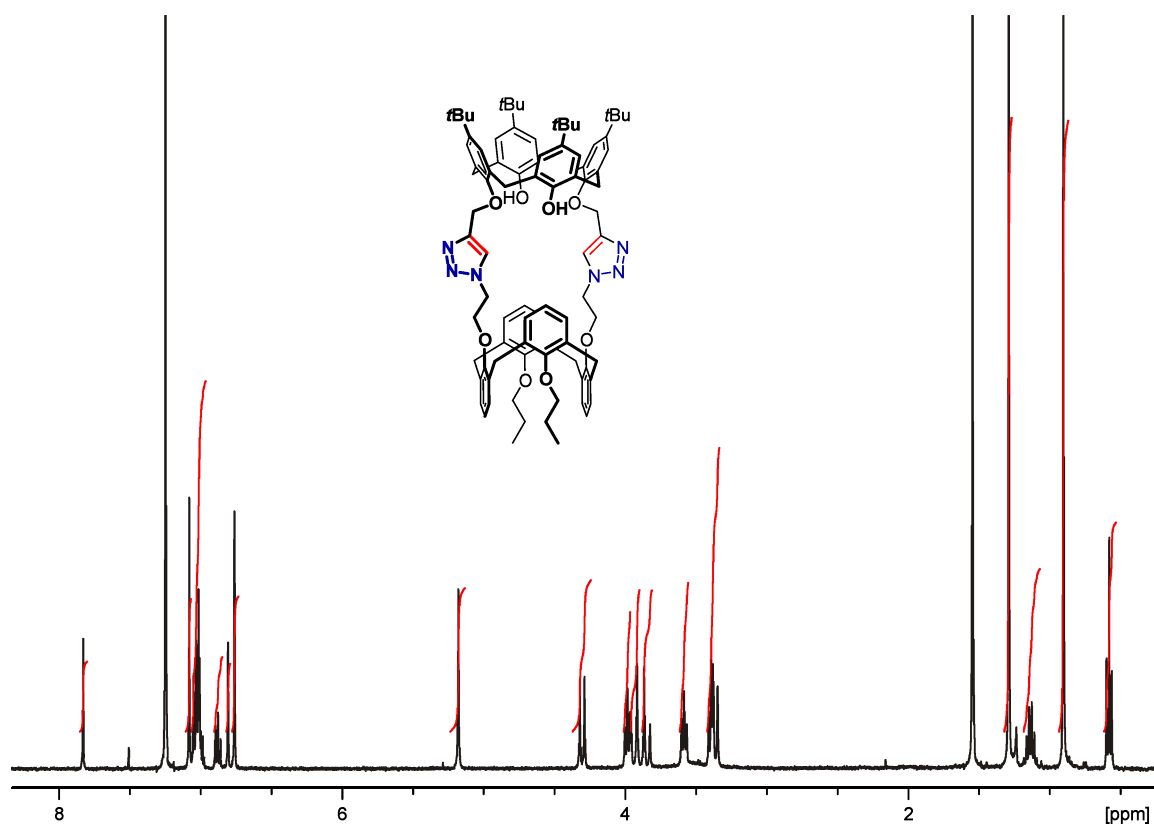

Figure S17.  $^1\text{H}$  NMR spectrum of calix[4]semitube AF (400 MHz,  $\text{CDCl}_3$ ).

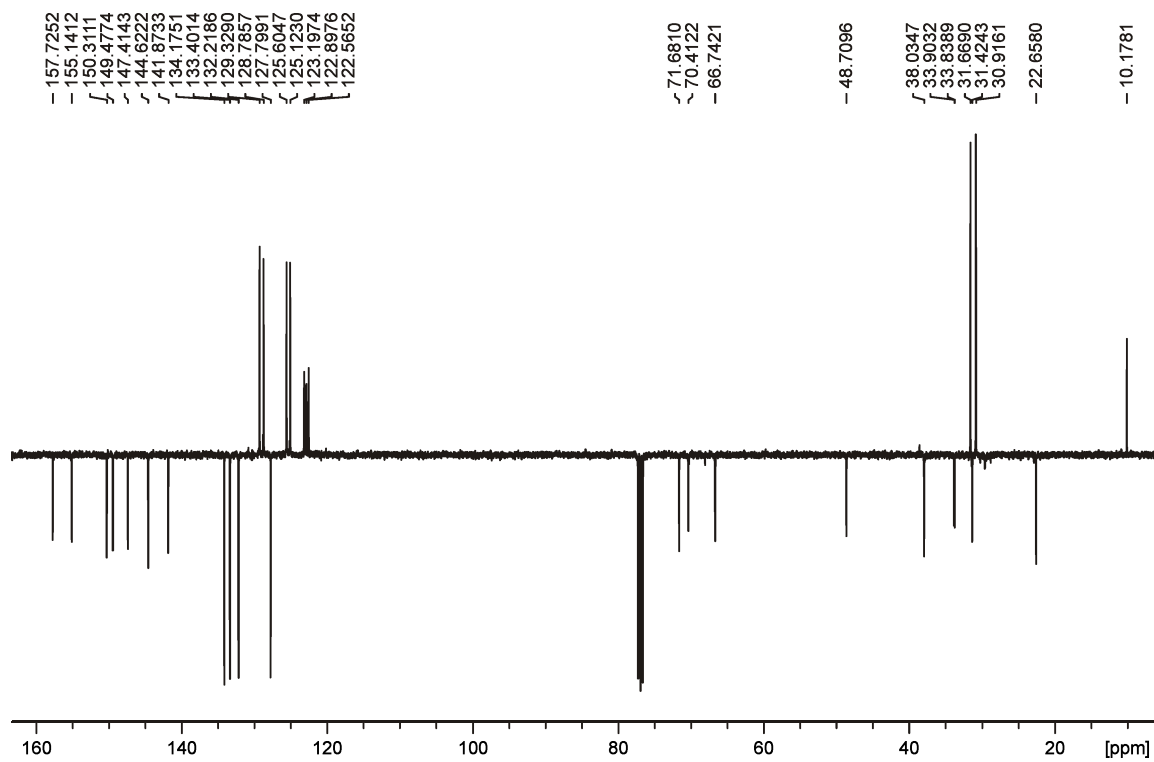

Figure S18.  $^{13}\text{C}$  NMR spectrum (APT) of calix[4]semitube AF (100 MHz,  $\text{CDCl}_3$ ).

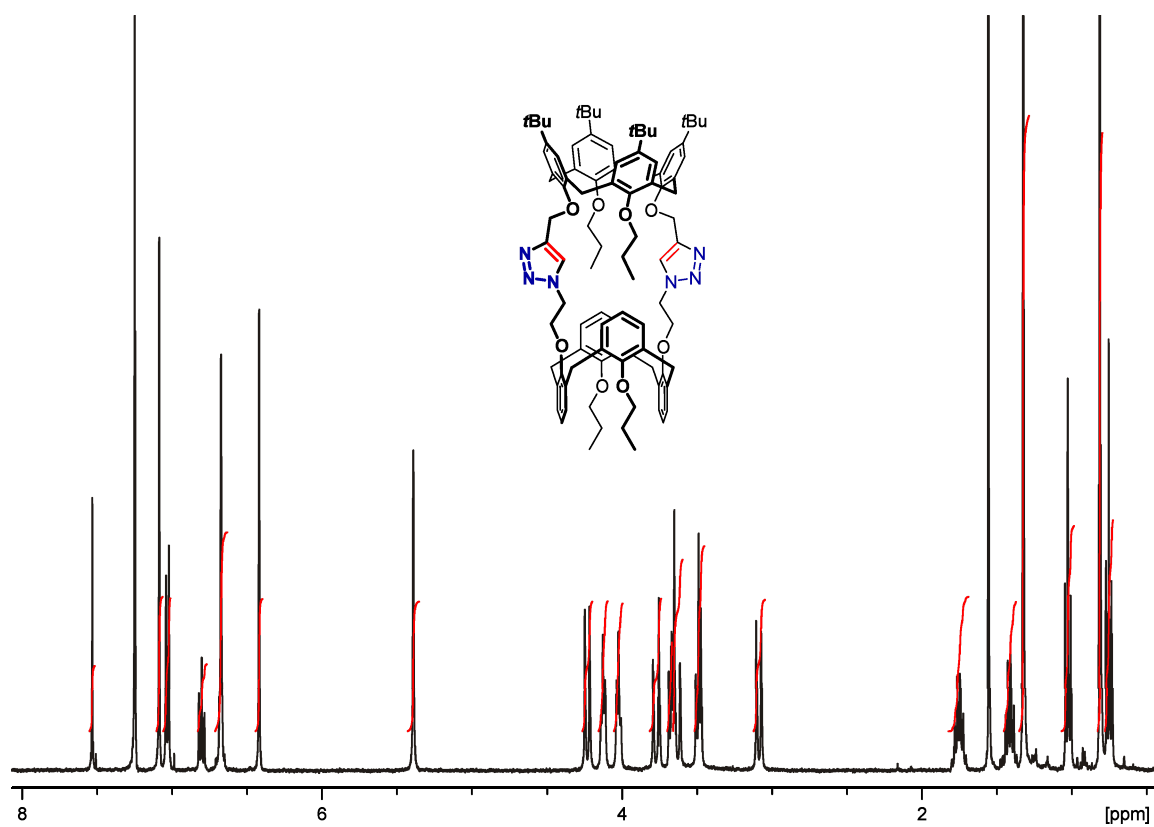

**Figure S19.** <sup>1</sup>H NMR spectrum of calix[4]semitube **BF** (400 MHz, CDCl<sub>3</sub>).

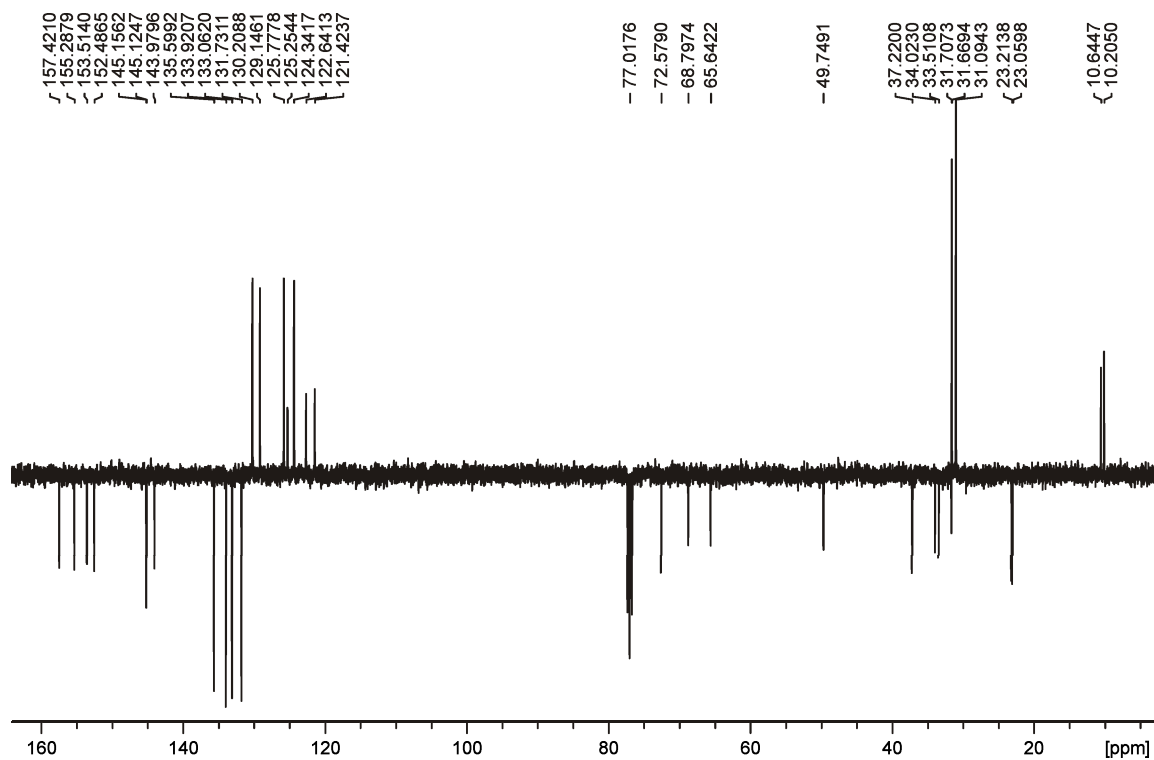

**Figure S20.** <sup>13</sup>C NMR spectrum (APT) of calix[4]semitube **BF** (100 MHz, CDCl<sub>3</sub>).



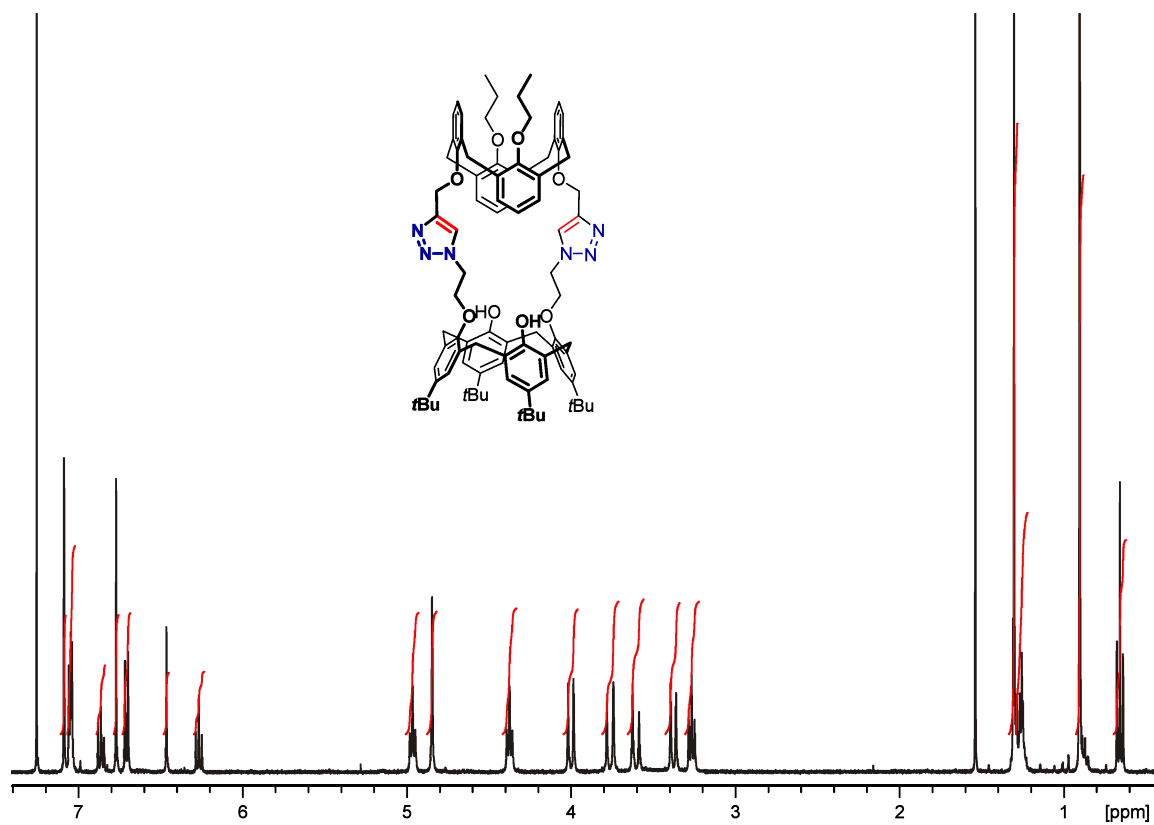

**Figure S21.** <sup>1</sup>H NMR spectrum of calix[4]semitube CD (400 MHz, CDCl<sub>3</sub>).

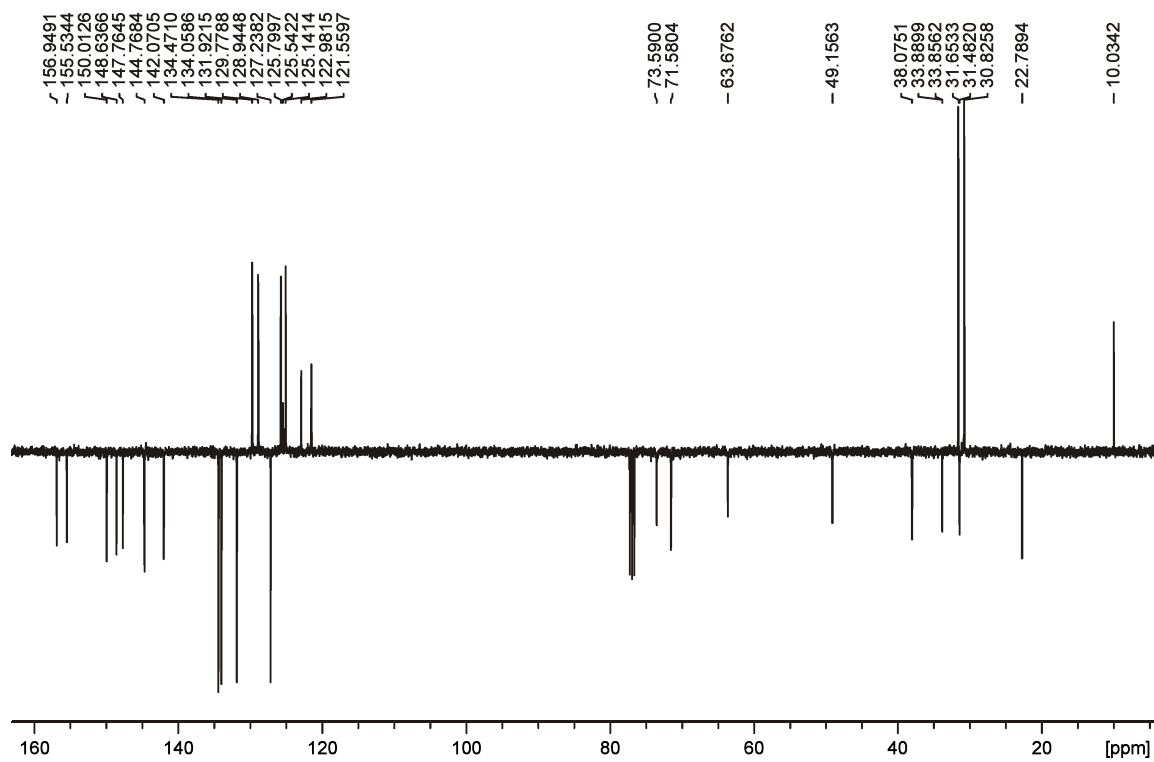

**Figure S22.** <sup>13</sup>C NMR spectrum (APT) of calix[4]semitube CD (100 MHz, CDCl<sub>3</sub>).

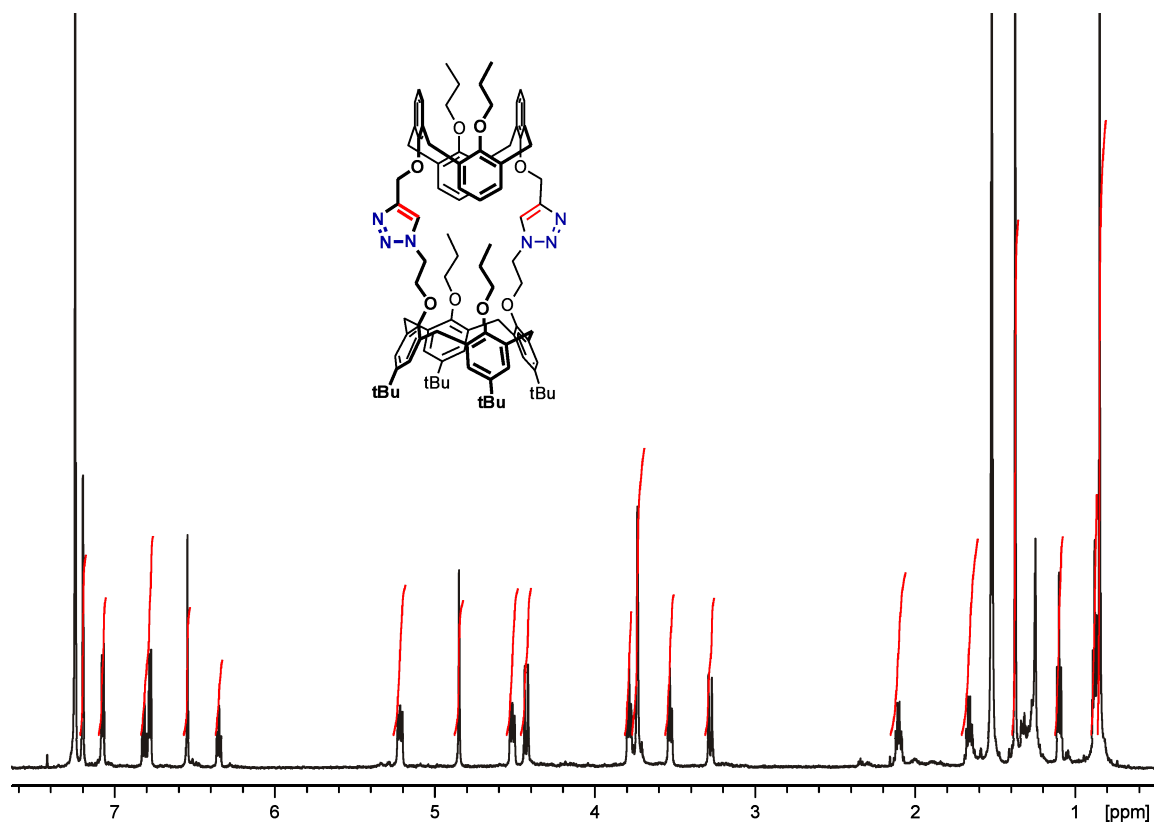

**Figure S23.** <sup>1</sup>H NMR spectrum of calix[4]semitube CE (600 MHz, CDCl<sub>3</sub>).

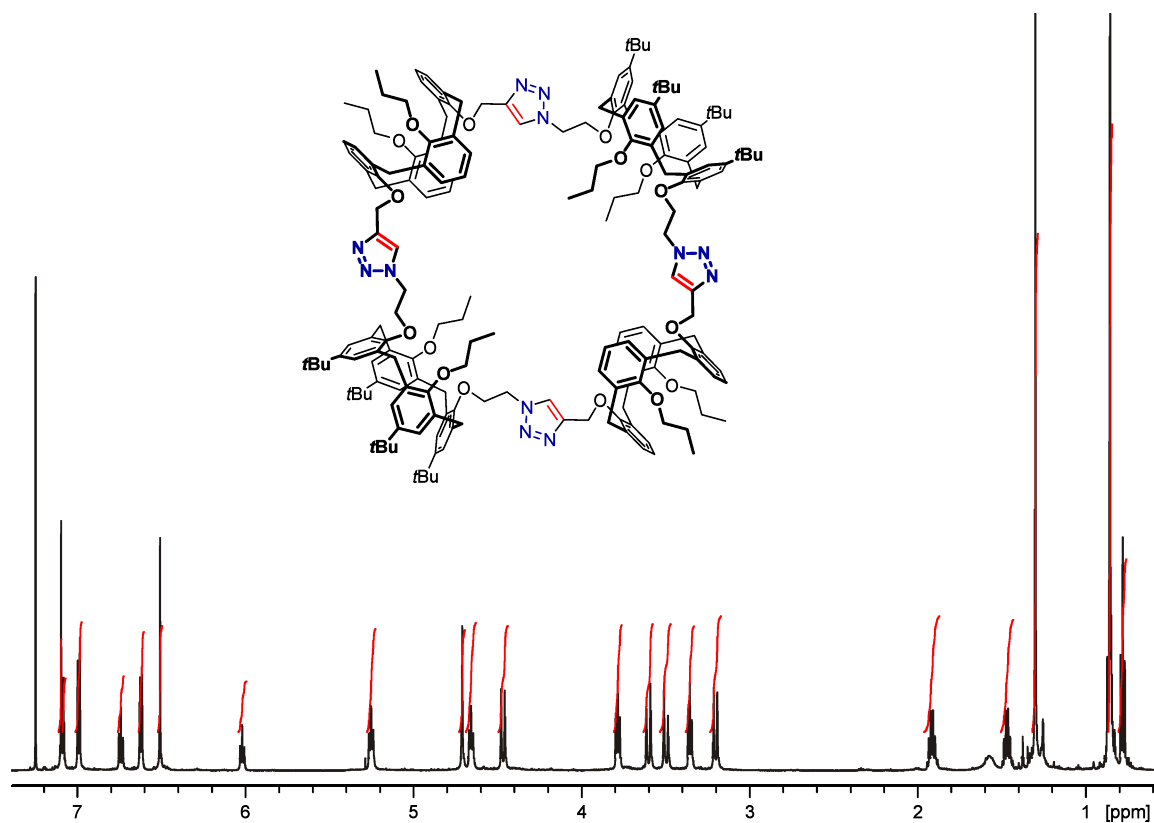

**Figure S24.**  $^1\text{H}$  NMR spectrum of tetrakis(calix[4]arene)  $\text{C}_2\text{E}_2$  (600 MHz,  $\text{CDCl}_3$ ).

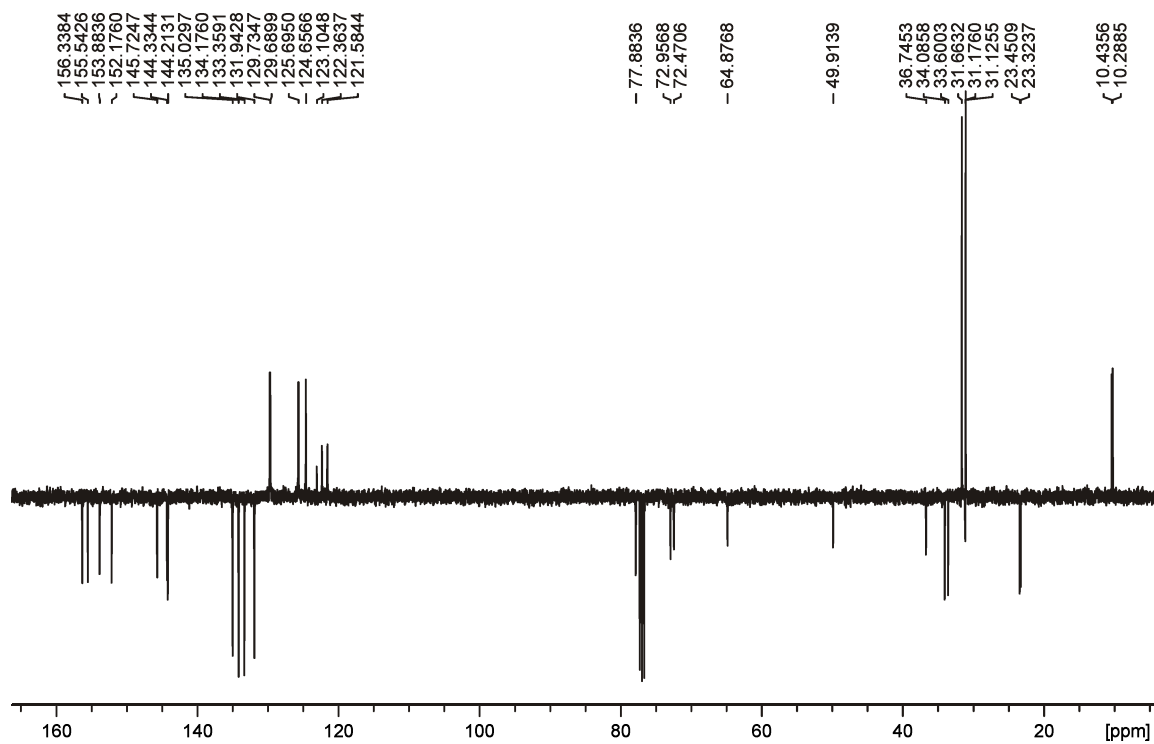

**Figure S25.**  $^{13}\text{C}$  NMR spectrum (APT) of tetrakis(calix[4]arene)  $\text{C}_2\text{E}_2$  (100 MHz,  $\text{CDCl}_3$ ).

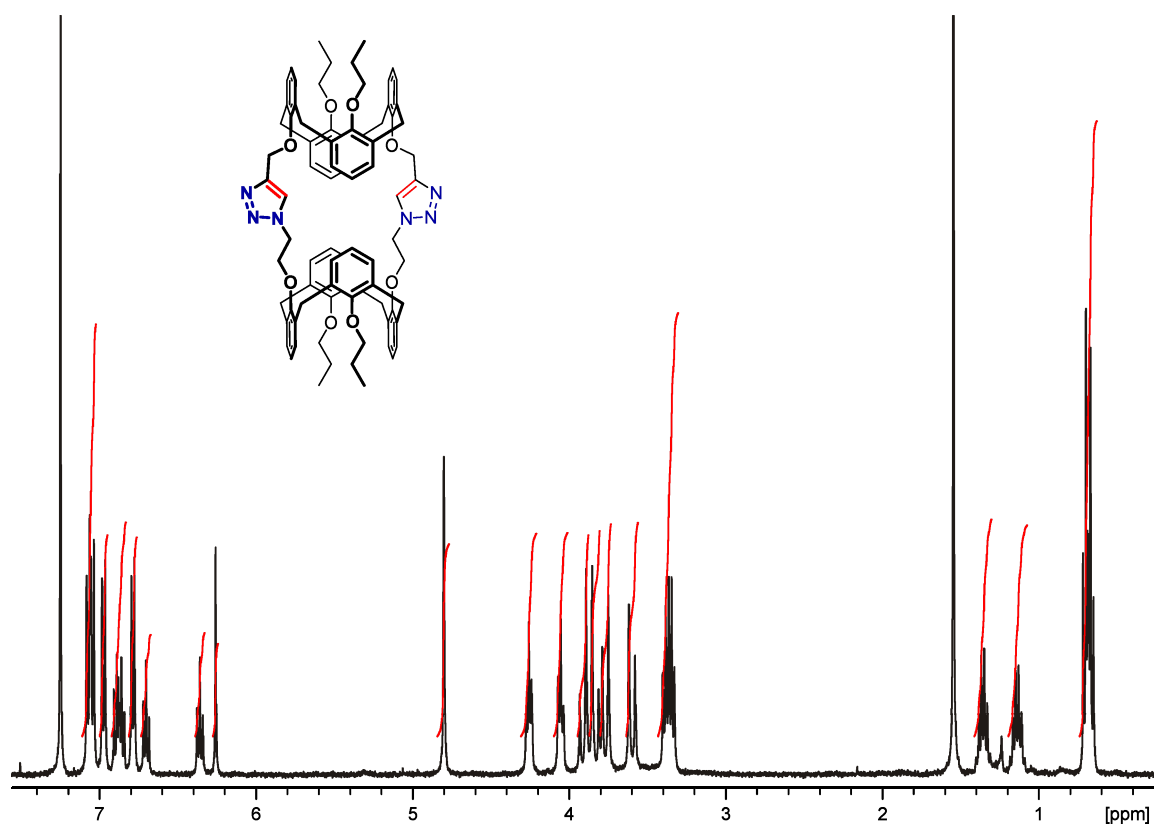

Figure S26. <sup>1</sup>H NMR spectrum of calix[4]semitube CF (400 MHz, CDCl<sub>3</sub>).

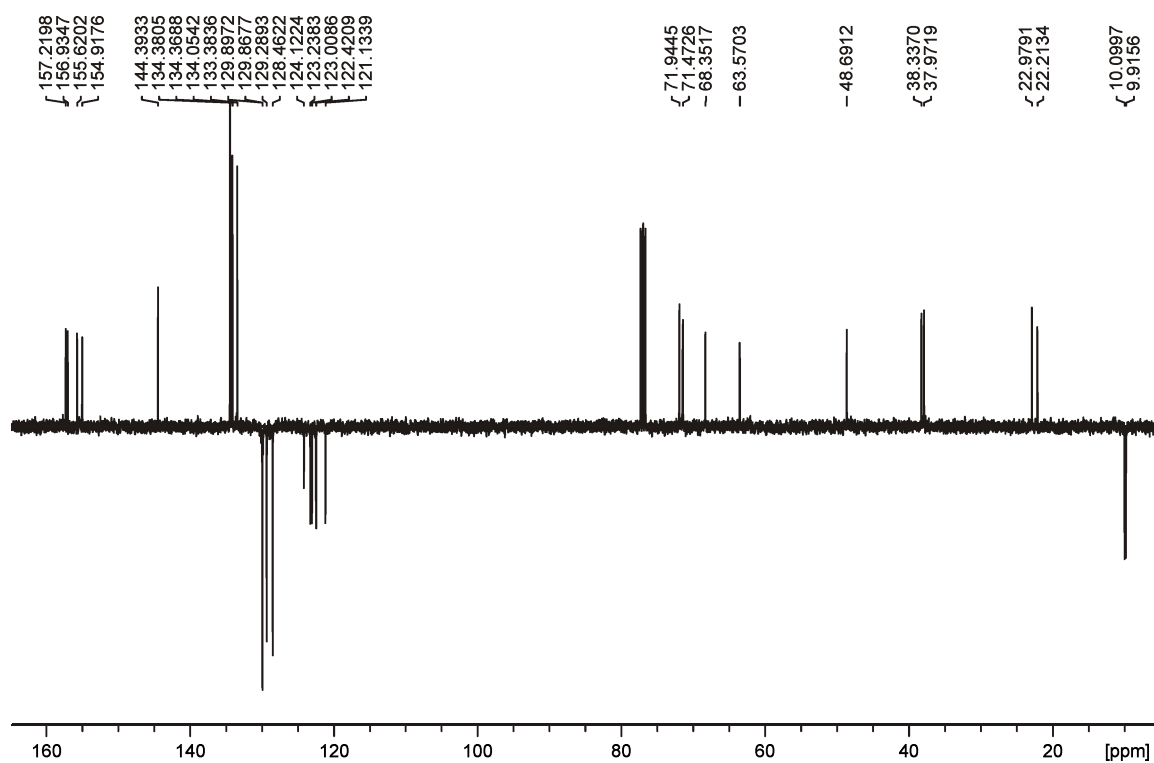

Figure S27. <sup>13</sup>C NMR spectrum (APT) of calix[4]semitube CF (100 MHz, CDCl<sub>3</sub>).

## Details of X-ray diffraction measurements

Crystallographic data were collected at 100 and 150 K on Bruker D8 Venture and Bruker SMART APEX II diffractometers using graphite monochromatized Mo-K $\alpha$  radiation ( $\lambda = 0.71073 \text{ \AA}$ ) using a  $\omega$ -scan mode. Absorption correction based on measurements of equivalent reflections was applied.<sup>S11</sup> The structures were solved by direct methods and refined by full matrix least-squares on  $F^2$  with anisotropic thermal parameters for all non-hydrogen atoms. Hydrogen atoms were placed in calculated positions and refined using a riding model. In structures of **6**, **AE**, **BD**, **BE**, **B<sub>2</sub>E<sub>2</sub>**, **CE** solvent dichloromethane and methanol molecules were not located and their contribution was suppressed by the SQUEEZE procedure.<sup>S12</sup> Crystallographic details are presented in Tables S6–S8.

Table S6 Details of the X-ray crystal data collection and structure refinement for compounds **6**, **C**, **AE**

| Compound                                    | <b>6</b>                                                      | <b>C</b>                                       | <b>AE</b>                                                                                        |
|---------------------------------------------|---------------------------------------------------------------|------------------------------------------------|--------------------------------------------------------------------------------------------------|
| CCDC number                                 | 2064439                                                       | 2064446                                        | 2064443                                                                                          |
| Empirical formula                           | C <sub>32</sub> H <sub>30</sub> N <sub>6</sub> O <sub>4</sub> | C <sub>40</sub> H <sub>40</sub> O <sub>4</sub> | C <sub>104</sub> H <sub>134</sub> N <sub>6</sub> O <sub>8</sub> ·CH <sub>2</sub> Cl <sub>2</sub> |
| M <sub>w</sub>                              | 562.62                                                        | 584.72                                         | 1681.09                                                                                          |
| Temperature (K)                             | 150(2)                                                        | 150(2)                                         | 100(2)                                                                                           |
| Size (mm)                                   | 0.25 x 0.22 x 0.16                                            | 0.30 x 0.22 x 0.15                             | 0.22 x 0.16 x 0.13                                                                               |
| Cryst. system                               | trigonal                                                      | monoclinic                                     | monoclinic                                                                                       |
| Space group                                 | R-3                                                           | C2/c                                           | C2/c                                                                                             |
| <i>a</i> (Å)                                | 35.3864(8)                                                    | 25.2023(14)                                    | 23.9917(12)                                                                                      |
| <i>b</i> (Å)                                | 35.3864(8)                                                    | 7.6250(4)                                      | 33.8220(15)                                                                                      |
| <i>c</i> (Å)                                | 11.7374(2)                                                    | 19.8425(17)                                    | 24.4169(11)                                                                                      |
| $\alpha$ (deg)                              | 90                                                            | 90                                             | 90                                                                                               |
| $\beta$ (deg)                               | 90                                                            | 126.177(2)                                     | 90.909(2)                                                                                        |
| $\gamma$ (deg)                              | 120                                                           | 90                                             | 90                                                                                               |
| V (Å <sup>3</sup> )                         | 12728.4(6)                                                    | 3077.9(4)                                      | 19810.5(16)                                                                                      |
| Z                                           | 18                                                            | 4                                              | 8                                                                                                |
| $\rho_{\text{calc}}$ (g·cm <sup>-3</sup> )  | 1.321                                                         | 1.262                                          | 1.127                                                                                            |
| Abs coeff (mm <sup>-1</sup> )               | 0.090                                                         | 0.080                                          | 0.122                                                                                            |
| <i>F</i> (000)                              | 5328                                                          | 1248                                           | 7248                                                                                             |
| $\theta$ range (deg)                        | 2.30 < $\theta$ < 25.05                                       | 2.54 < $\theta$ < 25.05                        | 1.70 < $\theta$ < 25.09                                                                          |
| no. of collected/unique rflns               | 39404 / 5010                                                  | 9144 / 2707                                    | 96317 / 17589                                                                                    |
| Completeness to $\theta$ (%)                | 99.9                                                          | 99.0                                           | 99.8                                                                                             |
| no. of data/restraints/params               | 5010/3/401                                                    | 2707/0/200                                     | 17589/62/1103                                                                                    |
| Goodness of fit on $F^2$                    | 1.046                                                         | 1.078                                          | 1.029                                                                                            |
| Final <i>R</i> indices ( $I > 2\sigma(I)$ ) | R1 = 0.0451,<br>wR2 = 0.1103                                  | R1 = 0.0571,<br>wR2 = 0.1086                   | R1 = 0.0881,<br>wR2 = 0.2430                                                                     |
| <i>R</i> indices (all data)                 | R1 = 0.0567,<br>wR2 = 0.1169                                  | R1 = 0.0770,<br>wR2 = 0.1154                   | R1 = 0.1292,<br>wR2 = 0.2792                                                                     |
| Largest diff peak/hole (e/Å <sup>3</sup> )  | 0.23 / -0.26                                                  | 0.24 / -0.24                                   | 0.89 / -0.88                                                                                     |

Table S7 Details of the X-ray crystal data collection and structure refinement for compounds **AF**, **BD**, **BE**

| Compound                                                     | <b>AF</b>                                                                                                               | <b>BD</b>                                                                                                                   | <b>BE</b>                                                                                           |
|--------------------------------------------------------------|-------------------------------------------------------------------------------------------------------------------------|-----------------------------------------------------------------------------------------------------------------------------|-----------------------------------------------------------------------------------------------------|
| CCDC number                                                  | 2064441                                                                                                                 | 2064442                                                                                                                     | 2064444                                                                                             |
| Empirical formula                                            | C <sub>88</sub> H <sub>102</sub> N <sub>6</sub> O <sub>8</sub> ·3CH <sub>2</sub> Cl <sub>2</sub><br>·CH <sub>3</sub> OH | C <sub>104</sub> H <sub>134</sub> N <sub>6</sub> O <sub>8</sub> ·1.25CH <sub>2</sub> Cl <sub>2</sub><br>·CH <sub>3</sub> OH | C <sub>110</sub> H <sub>146</sub> N <sub>6</sub> O <sub>8</sub><br>·CH <sub>2</sub> Cl <sub>2</sub> |
| M <sub>w</sub>                                               | 1658.57                                                                                                                 | 1733.35                                                                                                                     | 1765.25                                                                                             |
| Temperature (K)                                              | 100(2)                                                                                                                  | 100(2)                                                                                                                      | 100(2)                                                                                              |
| Size (mm)                                                    | 0.32 x 0.26 x 0.20                                                                                                      | 0.15 x 0.13 x 0.02                                                                                                          | 0.25 x 0.21 x 0.16                                                                                  |
| Cryst. system                                                | triclinic                                                                                                               | triclinic                                                                                                                   | monoclinic                                                                                          |
| Space group                                                  | P-1                                                                                                                     | P-1                                                                                                                         | P2 <sub>1</sub> /c                                                                                  |
| <i>a</i> (Å)                                                 | 12.1055(11)                                                                                                             | 13.9064(5)                                                                                                                  | 12.5392(4)                                                                                          |
| <i>b</i> (Å)                                                 | 16.3679(16)                                                                                                             | 19.3357(7)                                                                                                                  | 36.1127(17)                                                                                         |
| <i>c</i> (Å)                                                 | 23.864(2)                                                                                                               | 21.9559(8)                                                                                                                  | 25.3044(13)                                                                                         |
| <i>α</i> (deg)                                               | 102.046(3)                                                                                                              | 64.9250(10)                                                                                                                 | 90                                                                                                  |
| <i>β</i> (deg)                                               | 103.504(3)                                                                                                              | 81.1730(10)                                                                                                                 | 94.7740(10)                                                                                         |
| <i>γ</i> (deg)                                               | 96.551(3)                                                                                                               | 82.5030(10)                                                                                                                 | 90                                                                                                  |
| <i>V</i> (Å <sup>3</sup> )                                   | 4430.0(7)                                                                                                               | 5269.8(3)                                                                                                                   | 11418.7(9)                                                                                          |
| <i>Z</i>                                                     | 2                                                                                                                       | 2                                                                                                                           | 4                                                                                                   |
| $\rho_{\text{calc}}$ (g·cm <sup>-3</sup> )                   | 1.243                                                                                                                   | 1.092                                                                                                                       | 1.027                                                                                               |
| Abs coeff (mm <sup>-1</sup> )                                | 0.253                                                                                                                   | 0.130                                                                                                                       | 0.109                                                                                               |
| <i>F</i> (000)                                               | 1760                                                                                                                    | 1866                                                                                                                        | 3816                                                                                                |
| $\theta$ range (deg)                                         | 2.00 < $\theta$ < 26.36                                                                                                 | 1.75 < $\theta$ < 25.05                                                                                                     | 1.61 < $\theta$ < 26.38                                                                             |
| no. of collected/unique rflns                                | 91488 / 18060                                                                                                           | 45764 / 18538                                                                                                               | 120847 / 23255                                                                                      |
| Completeness to $\theta$ (%)                                 | 99.8                                                                                                                    | 99.3                                                                                                                        | 99.5                                                                                                |
| no. of data/restraints/params                                | 18060/4/1074                                                                                                            | 18538/84/1136                                                                                                               | 23255/68/1240                                                                                       |
| Goodness of fit on <i>F</i> <sup>2</sup>                     | 1.035                                                                                                                   | 1.033                                                                                                                       | 1.019                                                                                               |
| Final <i>R</i> indices ( <i>I</i> > 2 $\sigma$ ( <i>I</i> )) | R1 = 0.0585,<br>wR2 = 0.1477                                                                                            | R1 = 0.0983,<br>wR2 = 0.2579                                                                                                | R1 = 0.0776,<br>wR2 = 0.2110                                                                        |
| <i>R</i> indices (all data)                                  | R1 = 0.0659,<br>wR2 = 0.1529                                                                                            | R1 = 0.1201,<br>wR2 = 0.2758                                                                                                | R1 = 0.1031,<br>wR2 = 0.2305                                                                        |
| Largest diff peak/hole (e/Å <sup>3</sup> )                   | 1.36 / -0.98                                                                                                            | 1.18 / -0.85                                                                                                                | 0.82 / -1.29                                                                                        |

Table S8 Details of the X-ray crystal data collection and structure refinement for compounds **B<sub>2</sub>E<sub>2</sub>**, **CE**, **CF**

| Compound                                                     | <b>B<sub>2</sub>E<sub>2</sub></b>                                                                                           | <b>CE</b>                                                                                       | <b>CF</b>                                                     |
|--------------------------------------------------------------|-----------------------------------------------------------------------------------------------------------------------------|-------------------------------------------------------------------------------------------------|---------------------------------------------------------------|
| CCDC number                                                  | 2064445                                                                                                                     | 2064440                                                                                         | 2064838                                                       |
| Empirical formula                                            | C <sub>220</sub> H <sub>292</sub> N <sub>12</sub> O <sub>16</sub> ·6CH <sub>2</sub> Cl <sub>2</sub><br>·2CH <sub>3</sub> OH | C <sub>94</sub> H <sub>114</sub> N <sub>6</sub> O <sub>8</sub> ·CH <sub>2</sub> Cl <sub>2</sub> | C <sub>78</sub> H <sub>82</sub> N <sub>6</sub> O <sub>8</sub> |
| M <sub>w</sub>                                               | 3934.28                                                                                                                     | 1540.83                                                                                         | 1231.49                                                       |
| Temperature (K)                                              | 100(2)                                                                                                                      | 100(2)                                                                                          | 150(2)                                                        |
| Size (mm)                                                    | 0.40 x 0.27 x 0.22                                                                                                          | 0.25 x 0.21 x 0.16                                                                              | 0.22 x 0.18 x 0.01                                            |
| Cryst. system                                                | triclinic                                                                                                                   | triclinic                                                                                       | monoclinic                                                    |
| Space group                                                  | P-1                                                                                                                         | P-1                                                                                             | P2 <sub>1</sub> /c                                            |
| <i>a</i> (Å)                                                 | 18.6271(18)                                                                                                                 | 11.4467(13)                                                                                     | 11.1105(7)                                                    |
| <i>b</i> (Å)                                                 | 19.3721(18)                                                                                                                 | 20.509(2)                                                                                       | 33.701(2)                                                     |
| <i>c</i> (Å)                                                 | 20.3105(19)                                                                                                                 | 20.597(2)                                                                                       | 17.9090(12)                                                   |
| <i>α</i> (deg)                                               | 66.725(3)                                                                                                                   | 98.909(4)                                                                                       | 90                                                            |
| <i>β</i> (deg)                                               | 86.028(3)                                                                                                                   | 98.788(4)                                                                                       | 101.548(2)                                                    |
| <i>γ</i> (deg)                                               | 67.569(3)                                                                                                                   | 101.578(4)                                                                                      | 90                                                            |
| V (Å <sup>3</sup> )                                          | 6194.4(10)                                                                                                                  | 4594.5(9)                                                                                       | 6570.1(8)                                                     |
| Z                                                            | 1                                                                                                                           | 2                                                                                               | 4                                                             |
| $\rho_{\text{calc}}$ (g·cm <sup>-3</sup> )                   | 1.055                                                                                                                       | 1.114                                                                                           | 1.245                                                         |
| Abs coeff (mm <sup>-1</sup> )                                | 0.190                                                                                                                       | 0.126                                                                                           | 0.081                                                         |
| <i>F</i> (000)                                               | 2112                                                                                                                        | 1652                                                                                            | 2624                                                          |
| $\theta$ range (deg)                                         | 1.95 < $\theta$ < 25.70                                                                                                     | 1.85 < $\theta$ < 26.44                                                                         | 1.87 < $\theta$ < 25.05                                       |
| no. of collected/unique rflns                                | 88173 / 23558                                                                                                               | 74441 / 18774                                                                                   | 64876 / 11639                                                 |
| Completeness to $\theta$ (%)                                 | 99.9                                                                                                                        | 99.0                                                                                            | 99.9                                                          |
| no. of data/restraints/params                                | 23558/33/1271                                                                                                               | 18774/2/1037                                                                                    | 11639/1/842                                                   |
| Goodness of fit on <i>F</i> <sup>2</sup>                     | 1.029                                                                                                                       | 1.021                                                                                           | 0.987                                                         |
| Final <i>R</i> indices ( <i>I</i> > 2 $\sigma$ ( <i>I</i> )) | R1 = 0.0937,<br>wR2 = 0.2659                                                                                                | R1 = 0.0647,<br>wR2 = 0.1496                                                                    | R1 = 0.0696,<br>wR2 = 0.1227                                  |
| <i>R</i> indices (all data)                                  | R1 = 0.1138,<br>wR2 = 0.2860                                                                                                | R1 = 0.0835,<br>wR2 = 0.1598                                                                    | R1 = 0.1822,<br>wR2 = 0.1595                                  |
| Largest diff peak/hole (e/Å <sup>3</sup> )                   | 1.55 / -1.43                                                                                                                | 1.44 / -0.99                                                                                    | 0.46 / -0.22                                                  |

## Changes in NMR spectra of calix[4]semitubes upon addition of $Zn^{2+}$ and $Ag^+$

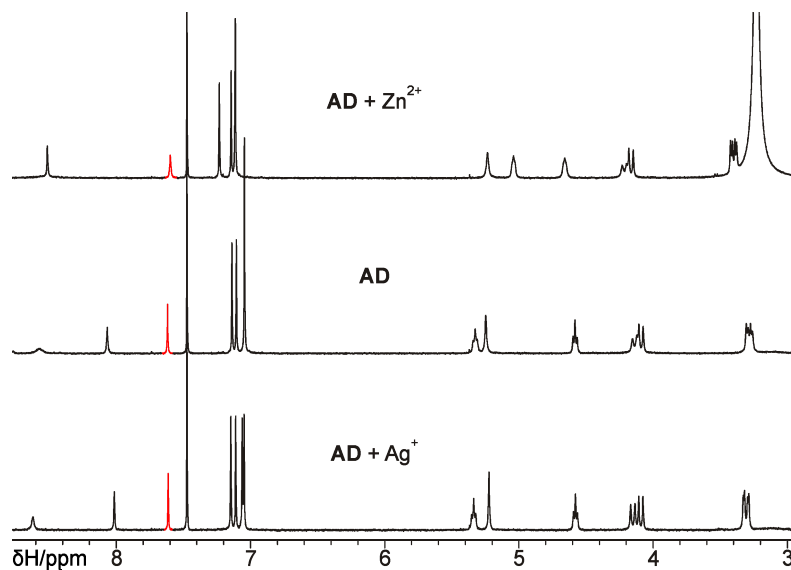

**Figure S28.** Parts of  $^1H$  NMR spectra of calix[4]semitube **AD** (middle) and its equilibrated mixtures with 10 equiv of  $Zn(ClO_4)_2 \cdot 6H_2O$  (top) and  $AgClO_4 \cdot H_2O$  (bottom);  $CD_3CN/CDCl_3$  (1:1), 400 MHz, 20 °C; signals of the triazole protons are marked red.

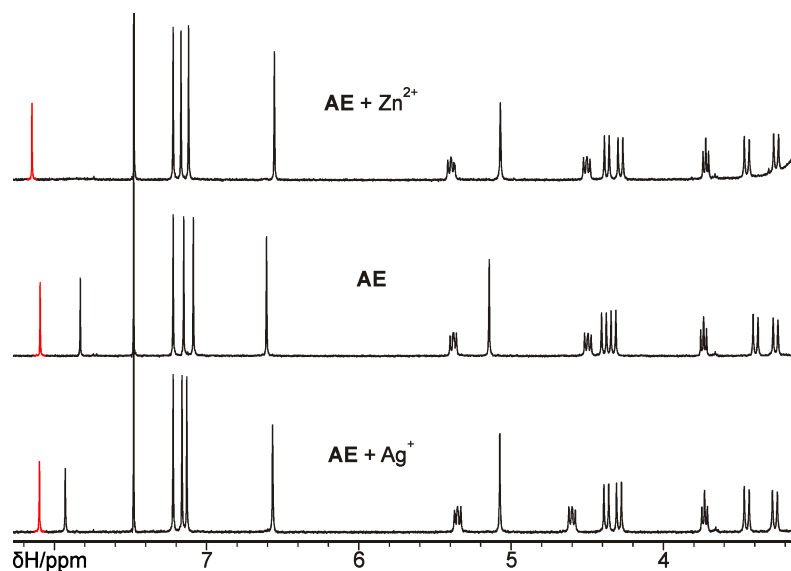

**Figure S29.** Parts of  $^1H$  NMR spectra of calix[4]semitube **AE** (middle) and its equilibrated mixtures with 10 equiv of  $Zn(ClO_4)_2 \cdot 6H_2O$  (top) and  $AgClO_4 \cdot H_2O$  (bottom);  $CD_3CN/CDCl_3$  (1:1), 400 MHz, 20 °C; signals of the triazole protons are marked red.



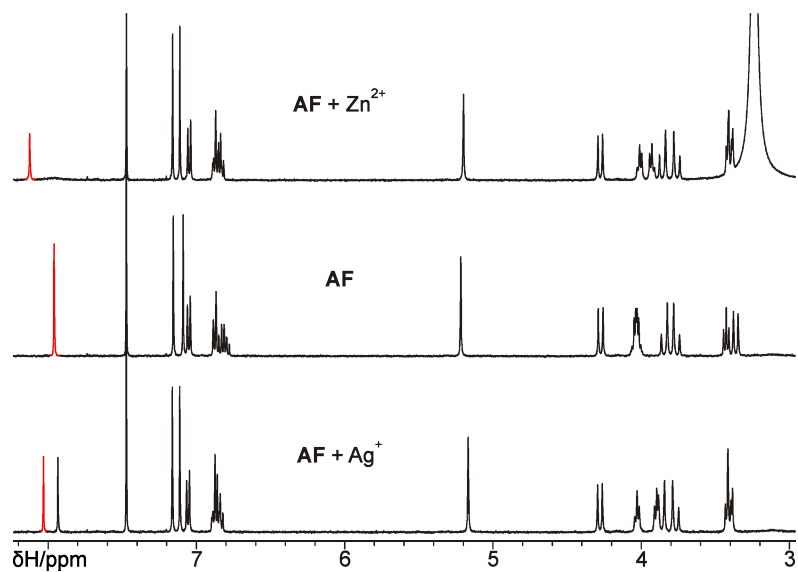

**Figure S30.** Parts of <sup>1</sup>H NMR spectra of calix[4]semitube **AF** (middle) and its equilibrated mixtures with 10 equiv of Zn(ClO<sub>4</sub>)<sub>2</sub>·6H<sub>2</sub>O (top) and AgClO<sub>4</sub>·H<sub>2</sub>O (bottom); CD<sub>3</sub>CN/CDCl<sub>3</sub> (1:1), 400 MHz, 20 °C; signals of the triazole protons are marked red.

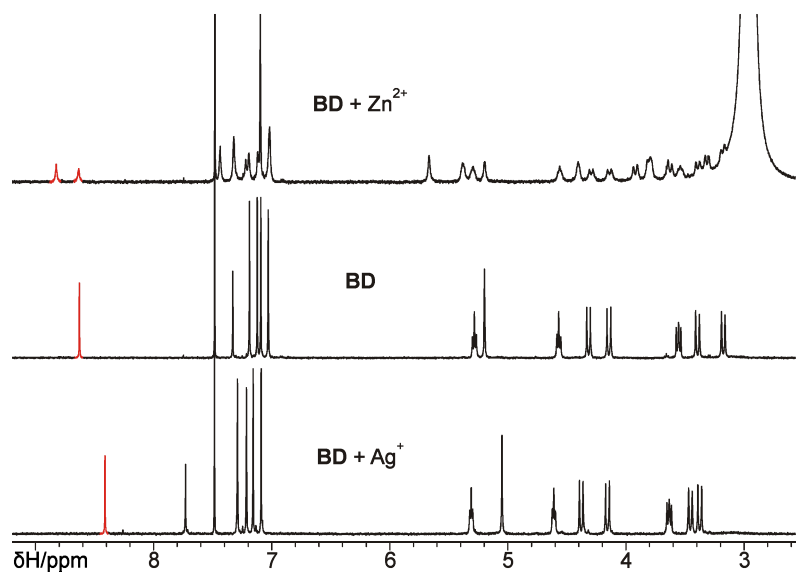

**Figure S31.** Parts of <sup>1</sup>H NMR spectra of calix[4]semitube **BD** (middle) and its equilibrated mixtures with 10 equiv of Zn(ClO<sub>4</sub>)<sub>2</sub>·6H<sub>2</sub>O (top) and AgClO<sub>4</sub>·H<sub>2</sub>O (bottom); CD<sub>3</sub>CN/CDCl<sub>3</sub> (1:1), 400 MHz, 20 °C; signals of the triazole protons are marked red.

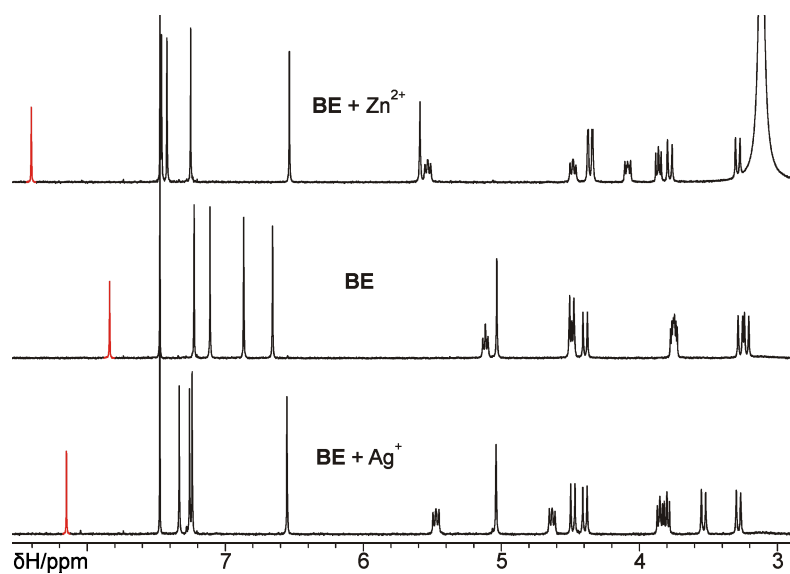

**Figure S32.** Parts of <sup>1</sup>H NMR spectra of calix[4]semitube **BE** (middle) and its equilibrated mixtures with 10 equiv of Zn(ClO<sub>4</sub>)<sub>2</sub>·6H<sub>2</sub>O (top) and AgClO<sub>4</sub>·H<sub>2</sub>O (bottom); CD<sub>3</sub>CN/CDCl<sub>3</sub> (1:1), 400 MHz, 20 °C; signals of the triazole protons are marked red.

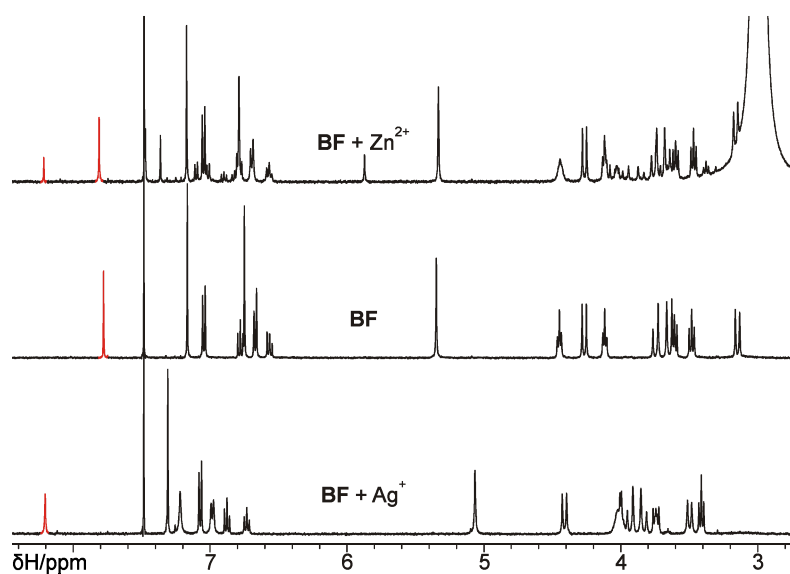

**Figure S33.** Parts of <sup>1</sup>H NMR spectra of calix[4]semitube **BF** (middle) and its equilibrated mixtures with 10 equiv of Zn(ClO<sub>4</sub>)<sub>2</sub>·6H<sub>2</sub>O (top) and AgClO<sub>4</sub>·H<sub>2</sub>O (bottom); CD<sub>3</sub>CN/CDCl<sub>3</sub> (1:1), 400 MHz, 20 °C; signals of the triazole protons are marked red.

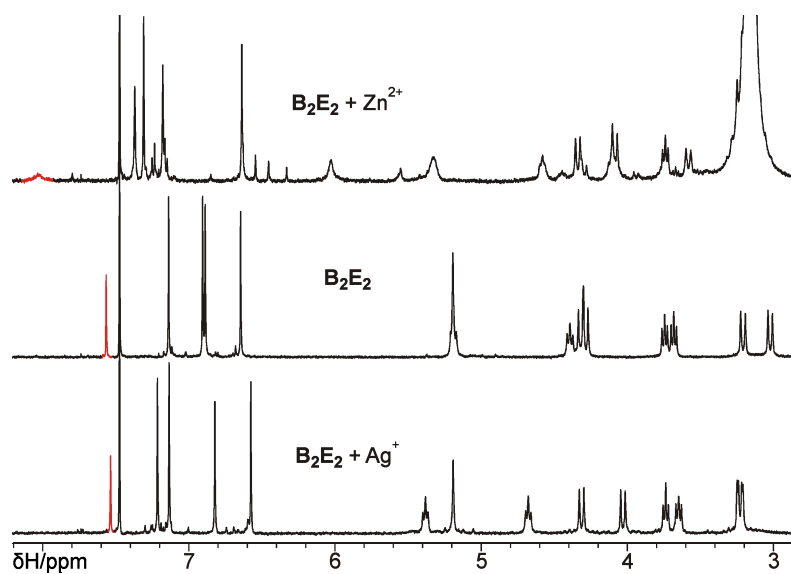

**Figure S34.** Parts of  $^1\text{H}$  NMR spectra of tetrakis(calixarene)  $\text{B}_2\text{E}_2$  (middle) and its equilibrated mixtures with 10 equiv of  $\text{Zn}(\text{ClO}_4)_2 \cdot 6\text{H}_2\text{O}$  (top) and  $\text{AgClO}_4 \cdot \text{H}_2\text{O}$  (bottom);  $\text{CD}_3\text{CN}/\text{CDCl}_3$  (1:1), 400 MHz, 20 °C; signals of the triazole protons are marked red.

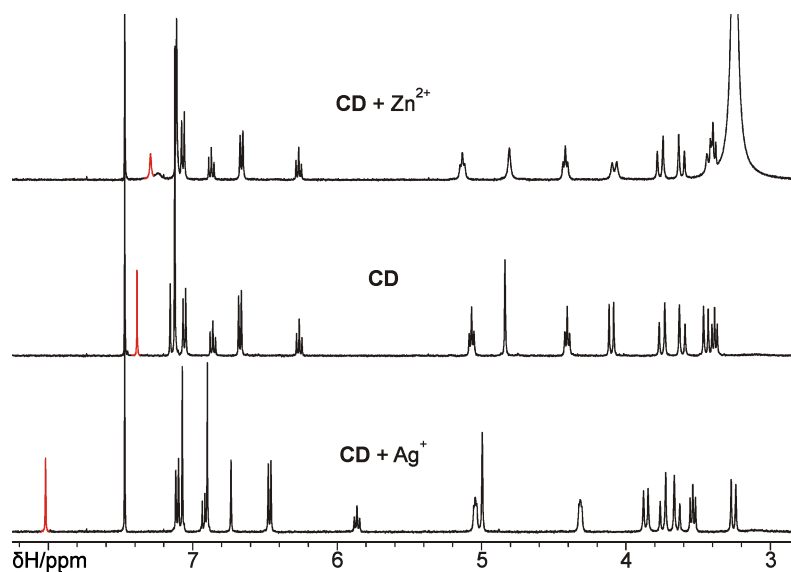

**Figure S35.** Parts of  $^1\text{H}$  NMR spectra of calix[4]semitube  $\text{CD}$  (middle) and its equilibrated mixtures with 10 equiv of  $\text{Zn}(\text{ClO}_4)_2 \cdot 6\text{H}_2\text{O}$  (top) and  $\text{AgClO}_4 \cdot \text{H}_2\text{O}$  (bottom);  $\text{CD}_3\text{CN}/\text{CDCl}_3$  (1:1), 400 MHz, 20 °C; signals of the triazole protons are marked red.

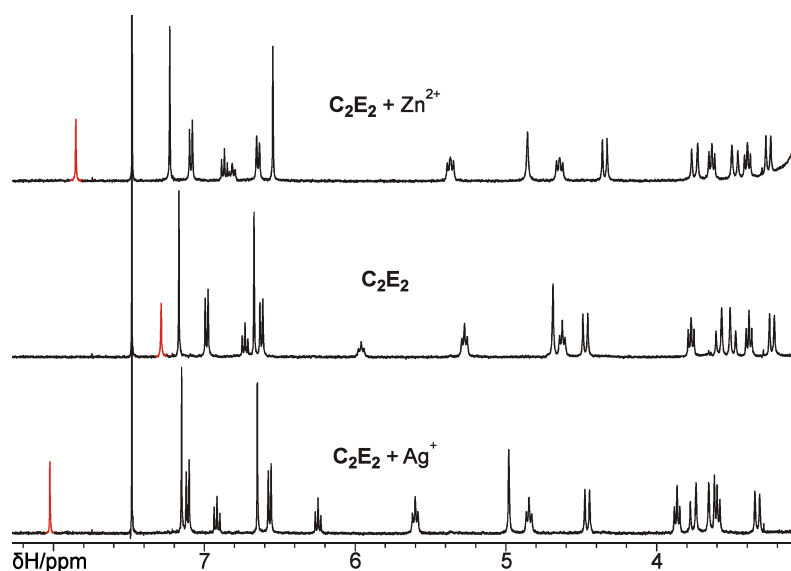

**Figure S36.** Parts of  $^1\text{H}$  NMR spectra of tetrakis(calixarene)  $\text{C}_2\text{E}_2$  (middle) and its equilibrated mixtures with 10 equiv of  $\text{Zn}(\text{ClO}_4)_2 \cdot 6\text{H}_2\text{O}$  (top) and  $\text{AgClO}_4 \cdot \text{H}_2\text{O}$  (bottom);  $\text{CD}_3\text{CN}/\text{CDCl}_3$  (1:1), 400 MHz, 20 °C; signals of the triazole protons are marked red.

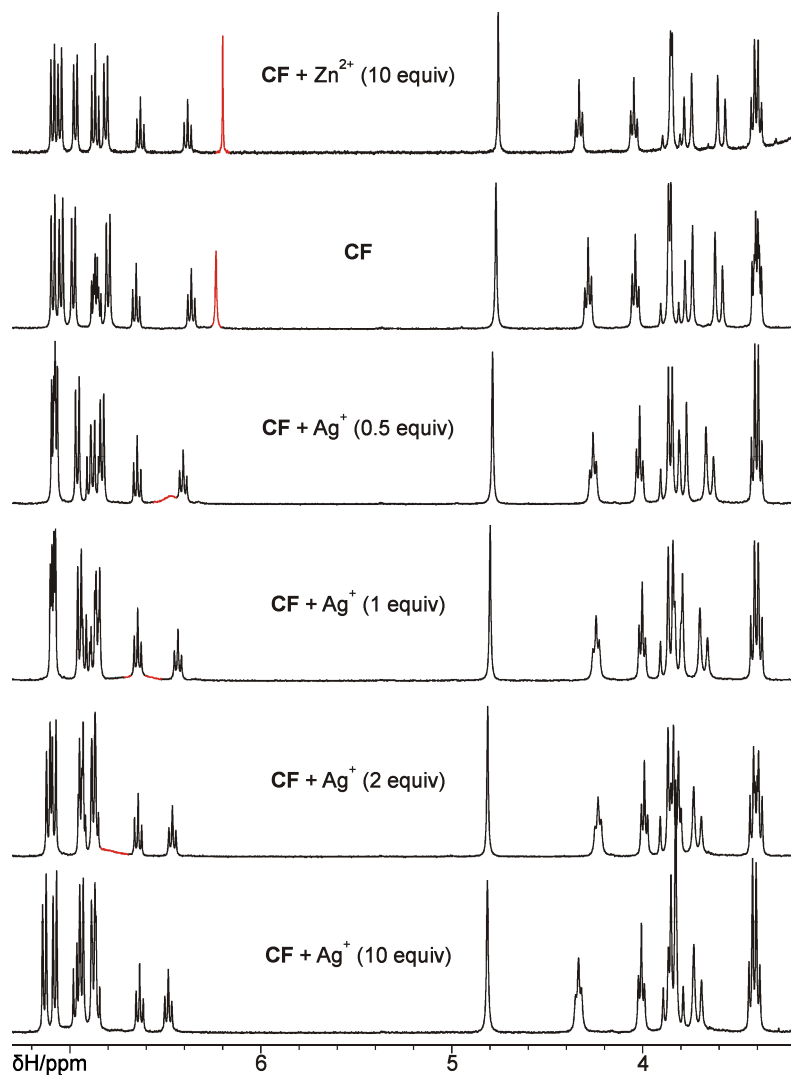

**Figure S37.** Parts of  $^1\text{H}$  NMR spectra of calix[4]semitube  $\text{CF}$  and its equilibrated mixtures with 10 equiv of  $\text{Zn}(\text{ClO}_4)_2 \cdot 6\text{H}_2\text{O}$  different amount of  $\text{AgClO}_4 \cdot \text{H}_2\text{O}$ ;  $\text{CD}_3\text{CN}/\text{CDCl}_3$  (1:1), 400 MHz, 20 °C; signals of the triazole protons are marked red.

## Atomic coordinates of the calculated structures

Complex **BE**·Zn<sup>2+</sup>, E = -6981.462674 E<sub>h</sub>

|    |           |           |           |   |           |            |            |
|----|-----------|-----------|-----------|---|-----------|------------|------------|
| Zn | -2.136123 | 1.842592  | -0.835067 | H | 1.858907  | -3.473562  | -1.303855  |
| O  | 2.069382  | -3.921207 | 0.713289  | H | 2.203013  | -2.077773  | -0.221929  |
| O  | 3.289497  | -1.080953 | 1.554234  | C | 5.018357  | -2.501189  | 4.483443   |
| O  | -4.094090 | 1.865390  | -0.986835 | H | 5.008657  | -2.394527  | 5.569266   |
| O  | 0.421903  | -1.972527 | 3.820733  | C | 0.179439  | -2.796965  | -0.090063  |
| O  | -0.822394 | -4.881215 | 2.339932  | H | -0.410667 | -3.701801  | -0.285807  |
| O  | 0.709789  | 3.036408  | -3.483711 | H | 0.019402  | -2.497570  | 0.953063   |
| O  | -1.180493 | 3.683447  | -0.507556 | C | -6.753924 | 6.121484   | -3.803437  |
| O  | -2.094435 | 1.359067  | -3.738255 | C | -4.691860 | 2.925515   | -1.711256  |
| N  | -0.331906 | -1.714604 | -0.938217 | C | -4.985891 | 0.906126   | -0.315543  |
| N  | -0.913747 | 0.947574  | 3.020253  | H | -4.334109 | 0.059812   | -0.049101  |
| C  | 2.957406  | -4.922871 | 0.362817  | H | -5.708514 | 0.564195   | -1.071691  |
| C  | 2.473327  | -6.240810 | 0.344849  | C | -3.036462 | 6.853188   | 0.038016   |
| C  | 3.349801  | -7.257844 | -0.065802 | H | -3.980464 | 7.171571   | 0.480890   |
| H  | 2.959872  | -8.275566 | -0.108344 | C | 0.963287  | -6.503477  | 5.122668   |
| C  | -2.758375 | 1.665903  | -4.940892 | H | 0.982571  | -6.437005  | 6.210836   |
| C  | -0.670320 | 5.974237  | -1.160519 | C | 5.920577  | -3.406899  | 3.900244   |
| C  | 0.935181  | -6.569614 | 2.329551  | C | -3.985570 | 4.525647   | 0.178790   |
| N  | -0.794731 | -0.621459 | -0.383166 | H | -3.654106 | 3.605765   | 0.677113   |
| C  | -4.155096 | 1.526854  | -4.974149 | H | -4.681417 | 5.018449   | 0.874394   |
| N  | -1.173859 | 0.169911  | -1.364216 | C | 2.219172  | -1.744314  | 5.422140   |
| C  | 5.840660  | -3.568242 | 2.514516  | C | 1.689278  | -7.515377  | 4.477686   |
| H  | 6.465928  | -4.308822 | 2.014985  | C | -0.898237 | 0.106534   | 4.234283   |
| C  | -2.768381 | 2.236275  | -7.280670 | H | -1.813391 | 0.355781   | 4.792669   |
| H  | -2.209978 | 2.549769  | -8.166251 | H | -0.036963 | 0.416732   | 4.841483   |
| C  | -0.550155 | 6.434068  | -4.185273 | C | 3.040705  | -0.899782  | 4.458073   |
| H  | -0.590067 | 7.402264  | -3.687738 | H | 3.531775  | -0.081523  | 5.011948   |
| C  | -0.479138 | 3.918755  | -5.395571 | H | 2.382995  | -0.460646  | 3.700061   |
| C  | -5.396578 | 5.207206  | -1.833323 | C | -2.093461 | 7.814507   | -0.349032  |
| H  | -5.444485 | 6.202015  | -1.385847 | C | -4.882265 | 2.209077   | -8.729622  |
| N  | -1.658424 | 1.675823  | 1.189114  | C | 0.494290  | -3.452010  | 5.761672   |
| C  | 4.298834  | -4.618411 | 0.056327  | C | -0.569343 | 2.431306   | 1.473684   |
| C  | 4.678402  | -7.005319 | -0.431939 | C | -0.404186 | -1.655773  | -2.297162  |
| C  | 1.058237  | -6.563045 | 0.808235  | H | -0.068603 | -2.463866  | -2.942824  |
| H  | 0.778156  | -7.551628 | 0.409791  | C | -7.277862 | 5.692070   | -5.188064  |
| H  | 0.348531  | -5.833630 | 0.397931  | H | -7.811036 | 6.533286   | -5.656416  |
| C  | 0.489141  | 5.544029  | -2.043615 | H | -7.989697 | 4.853837   | -5.123511  |
| H  | 0.931951  | 4.607120  | -1.691787 | H | -6.459948 | 5.403290   | -5.867200  |
| H  | 1.279210  | 6.310700  | -1.995475 | C | -1.659490 | 7.499166   | -6.260839  |
| C  | 0.091568  | 4.103485  | -4.121983 | C | -0.958253 | -0.416518  | -2.569513  |
| C  | 4.952899  | -2.832205 | 1.717175  | C | -0.517475 | -4.440240  | 5.185448   |
| C  | -1.045929 | 5.022573  | -6.044133 | H | -1.221590 | -3.949295  | 4.506642   |
| H  | -1.491842 | 4.859281  | -7.026288 | H | -1.102763 | -4.870350  | 6.013921   |
| C  | -0.067821 | 1.959891  | 2.674718  | C | 5.637769  | -8.124253  | -0.890927  |
| H  | 0.779196  | 2.251244  | 3.289469  | C | -5.691649 | 1.471288   | 0.904073   |
| C  | -2.049240 | 2.089426  | -6.084564 | H | -6.273985 | 2.361331   | 0.612541   |
| C  | 0.115037  | -5.655111 | 3.021534  | H | -4.941424 | 1.794231   | 1.644245   |
| C  | -0.940414 | 7.338011  | -0.994415 | C | 1.036667  | -3.697907  | 7.028965   |
| H  | -0.212048 | 8.048058  | -1.390422 | H | 0.597179  | -4.506409  | 7.617555   |
| C  | -4.153397 | 2.023003  | -7.383006 | C | 2.712870  | -2.028848  | 6.709430   |
| C  | 4.100830  | -1.749031 | 3.739462  | H | 3.596329  | -1.482370  | 7.042913   |
| C  | 5.127922  | -5.673201 | -0.349424 | C | -2.092424 | 8.639947   | -5.319159  |
| H  | 6.164864  | -5.439837 | -0.604816 | H | -2.809834 | 8.295190   | -4.556843  |
| C  | -5.990776 | 4.986197  | -3.089842 | H | -2.576587 | 9.439505   | -5.900986  |
| C  | 4.127766  | -1.872167 | 2.332933  | H | -1.233606 | 9.097025   | -4.803214  |
| C  | 1.037092  | -2.385367 | 5.007227  | C | -0.107237 | 3.431328   | 0.446665   |
| C  | -1.080033 | 6.303905  | -5.477051 | H | 0.200003  | 4.382024   | 0.903215   |
| C  | -0.595095 | 2.548574  | -6.052584 | H | 0.747816  | 3.021412   | -0.117954  |
| H  | -0.235065 | 2.610662  | -7.090935 | C | 4.968001  | -9.511781  | -0.884674  |
| H  | 0.066470  | 1.838065  | -5.544385 | H | 4.644151  | -9.810881  | 0.125160   |
| C  | -4.726741 | 4.202244  | -1.124966 | H | 5.688036  | -10.268027 | -1.235028  |
| C  | 1.692352  | -7.483193 | 3.073862  | H | 4.095790  | -9.556558  | -1.555198  |
| H  | 2.303117  | -8.201821 | 2.522637  | C | -2.890937 | 7.067013   | -7.090787  |
| N  | -1.873719 | 0.789617  | 2.125148  | H | -2.630457 | 6.368785   | -7.899492  |
| C  | -4.822453 | 1.690231  | -6.198599 | H | -3.355634 | 7.945528   | -7.564900  |
| H  | -5.903501 | 1.544391  | -6.208221 | H | -3.649394 | 6.577249   | -6.459404  |
| C  | -4.959362 | 1.323654  | -3.702111 | C | -0.571468 | 8.036175   | -7.220244  |
| H  | -4.437906 | 0.628029  | -3.033756 | H | 0.308155  | 8.394150   | -6.661273  |
| H  | -5.930179 | 0.870245  | -3.957494 | H | -0.963613 | 8.877751   | -7.814549  |
| C  | -1.580594 | 5.059629  | -0.601514 | H | -0.231917 | 7.256043   | -7.919702  |
| C  | 0.023280  | 5.359887  | -3.490277 | C | -4.219075 | 1.332077   | -9.815626  |
| C  | -5.187493 | 2.660998  | -2.993772 | H | -3.158521 | 1.586574   | -9.968555  |
| C  | 4.857694  | -3.207576 | 0.240724  | H | -4.733483 | 1.472469   | -10.779735 |
| H  | 5.862379  | -3.178630 | -0.209140 | H | -4.276762 | 0.262932   | -9.554142  |
| H  | 4.255056  | -2.468233 | -0.303772 | C | 2.141163  | 3.048055   | -3.569139  |
| C  | 0.188310  | -5.563443 | 4.424495  | H | 2.546486  | 3.908279   | -3.003549  |
| C  | -2.821481 | 5.469505  | -0.090921 | H | 2.450364  | 3.188277   | -4.621414  |
| C  | -0.865464 | -1.414460 | 3.969719  | C | -5.816778 | 7.334591   | -4.007130  |
| H  | -1.394169 | -1.877523 | 4.817466  | H | -4.957688 | 7.066480   | -4.641402  |
| H  | -1.438145 | -1.639900 | 3.055811  | H | -5.425586 | 7.734122   | -3.058911  |
| C  | -5.839066 | 3.712538  | -3.655514 | H | -6.359615 | 8.151548   | -4.508764  |
| H  | -6.222195 | 3.519754  | -4.656438 | C | -7.961530 | 6.542897   | -2.931966  |
| C  | 1.670190  | -3.038854 | -0.304678 | H | -8.530562 | 7.339734   | -3.437023  |

|   |           |            |            |   |           |           |           |
|---|-----------|------------|------------|---|-----------|-----------|-----------|
| H | -7.646223 | 6.933288   | -1.951236  | C | 1.531332  | -3.205357 | 10.000953 |
| H | -8.645551 | 5.697279   | -2.756863  | H | 1.131284  | -2.179689 | 10.053825 |
| C | 2.439801  | -8.631034  | 5.239699   | H | 1.909670  | -3.475448 | 11.000326 |
| C | -1.164962 | 0.288948   | -3.871016  | H | 0.692076  | -3.880631 | 9.776091  |
| H | -0.182175 | 0.680579   | -4.178398  | C | 3.806278  | -2.371518 | 9.389307  |
| H | -1.505593 | -0.428962  | -4.635181  | H | 4.675449  | -2.429258 | 8.715534  |
| C | 2.125672  | -2.979736  | 7.552795   | H | 4.159207  | -2.652486 | 10.393935 |
| C | 6.893954  | -4.217162  | 4.780001   | H | 3.473264  | -1.322244 | 9.436636  |
| C | -4.798237 | 3.697174   | -9.147036  | C | -2.080508 | -5.562868 | 2.199600  |
| H | -5.242989 | 4.350913   | -8.379311  | H | -2.253487 | -6.182496 | 3.096245  |
| H | -5.348149 | 3.861262   | -10.087808 | H | -2.029668 | -6.255423 | 1.335587  |
| H | -3.759658 | 4.025033   | -9.310456  | C | -3.249131 | -4.597005 | 2.037008  |
| C | 6.856020  | -8.172207  | 0.064044   | H | -4.165734 | -5.205564 | 2.135134  |
| H | 7.426812  | -7.231112  | 0.048288   | H | -3.258321 | -3.896375 | 2.890351  |
| H | 7.542945  | -8.983799  | -0.224559  |   |           |           |           |
| H | 6.532446  | -8.349660  | 1.103506   |   |           |           |           |
| C | 6.115436  | -7.834495  | -2.332733  |   |           |           |           |
| H | 5.267875  | -7.851236  | -3.037275  |   |           |           |           |
| H | 6.839718  | -8.599035  | -2.656450  |   |           |           |           |
| H | 6.612684  | -6.855127  | -2.419359  |   |           |           |           |
| C | -6.370065 | 1.818532   | -8.641112  |   |           |           |           |
| H | -6.503259 | 0.767088   | -8.340328  |   |           |           |           |
| H | -6.843961 | 1.941890   | -9.626906  |   |           |           |           |
| H | -6.930046 | 2.451862   | -7.935330  |   |           |           |           |
| C | 1.733717  | -9.985378  | 4.986687   |   |           |           |           |
| H | 1.726540  | -10.248802 | 3.917242   |   |           |           |           |
| H | 0.689849  | -9.963990  | 5.338306   |   |           |           |           |
| H | 2.255580  | -10.792910 | 5.525914   |   |           |           |           |
| C | -6.619900 | 0.423377   | 1.524902   |   |           |           |           |
| H | -7.388987 | 0.085045   | 0.811275   |   |           |           |           |
| H | -7.143048 | 0.841349   | 2.397816   |   |           |           |           |
| H | -6.058061 | -0.463238  | 1.863015   |   |           |           |           |
| C | 3.903412  | -8.741909  | 4.751911   |   |           |           |           |
| H | 4.433951  | -9.514941  | 5.329381   |   |           |           |           |
| H | 4.445046  | -7.792598  | 4.886214   |   |           |           |           |
| H | 3.972235  | -9.027502  | 3.689785   |   |           |           |           |
| C | 2.693355  | 1.749130   | -3.000064  |   |           |           |           |
| H | 2.190365  | 1.551166   | -2.033340  |   |           |           |           |
| H | 2.415972  | 0.914456   | -3.667629  |   |           |           |           |
| C | 2.459607  | -8.375015  | 6.757539   |   |           |           |           |
| H | 1.447458  | -8.374821  | 7.192198   |   |           |           |           |
| H | 2.941471  | -7.416182  | 7.007163   |   |           |           |           |
| H | 3.029048  | -9.168429  | 7.264605   |   |           |           |           |
| C | 3.859659  | 0.097269   | 0.987121   |   |           |           |           |
| H | 3.261900  | 0.310188   | 0.081140   |   |           |           |           |
| H | 4.897213  | -0.097406  | 0.657558   |   |           |           |           |
| C | -2.317830 | 9.324635   | -0.150338  |   |           |           |           |
| C | 6.069662  | -5.106198  | 5.741030   |   |           |           |           |
| H | 6.734431  | -5.701295  | 6.389925   |   |           |           |           |
| H | 5.430851  | -5.800162  | 5.171714   |   |           |           |           |
| H | 5.412688  | -4.507090  | 6.389621   |   |           |           |           |
| C | 4.208785  | 1.800202   | -2.798860  |   |           |           |           |
| H | 4.736403  | 2.043256   | -3.735628  |   |           |           |           |
| H | 4.598544  | 0.836722   | -2.436562  |   |           |           |           |
| H | 4.485634  | 2.566706   | -2.056899  |   |           |           |           |
| C | 2.667367  | -3.314508  | 8.958216   |   |           |           |           |
| C | 3.808660  | 1.312002   | 1.916805   |   |           |           |           |
| H | 2.796930  | 1.349542   | 2.354072   |   |           |           |           |
| H | 4.502511  | 1.164479   | 2.760409   |   |           |           |           |
| C | -3.448083 | 9.603927   | 0.857595   |   |           |           |           |
| H | -3.255182 | 9.125895   | 1.831708   |   |           |           |           |
| H | -4.429337 | 9.262872   | 0.490442   |   |           |           |           |
| H | -3.532227 | 10.687598  | 1.030407   |   |           |           |           |
| C | 4.100027  | 2.638964   | 1.213670   |   |           |           |           |
| H | 3.402149  | 2.809383   | 0.373400   |   |           |           |           |
| H | 5.120079  | 2.676355   | 0.798893   |   |           |           |           |
| H | 3.998861  | 3.487024   | 1.910528   |   |           |           |           |
| C | 7.784365  | -3.251788  | 5.595110   |   |           |           |           |
| H | 7.188938  | -2.585946  | 6.240345   |   |           |           |           |
| H | 8.395129  | -2.617449  | 4.931012   |   |           |           |           |
| H | 8.468686  | -3.820960  | 6.246110   |   |           |           |           |
| C | -1.022434 | 9.986194   | 0.380940   |   |           |           |           |
| H | -1.198445 | 11.054026  | 0.584532   |   |           |           |           |
| H | -0.193622 | 9.927056   | -0.341495  |   |           |           |           |
| H | -0.688958 | 9.516926   | 1.320320   |   |           |           |           |
| C | 7.812455  | -5.131956  | 3.946424   |   |           |           |           |
| H | 8.483738  | -5.692928  | 4.616801   |   |           |           |           |
| H | 8.444549  | -4.554442  | 3.253122   |   |           |           |           |
| H | 7.243400  | -5.870726  | 3.357199   |   |           |           |           |
| C | -2.701481 | 9.951337   | -1.513494  |   |           |           |           |
| H | -3.611693 | 9.483685   | -1.922931  |   |           |           |           |
| H | -1.898265 | 9.832741   | -2.257757  |   |           |           |           |
| H | -2.899069 | 11.029873  | -1.401052  |   |           |           |           |
| C | 3.211857  | -4.763467  | 8.953817   |   |           |           |           |
| H | 2.428839  | -5.495596  | 8.701409   |   |           |           |           |
| H | 3.608149  | -5.028477  | 9.947575   |   |           |           |           |
| H | 4.027634  | -4.881631  | 8.224166   |   |           |           |           |
| C | -3.304666 | -3.819751  | 0.719785   |   |           |           |           |
| H | -4.222916 | -3.211897  | 0.654307   |   |           |           |           |
| H | -3.296522 | -4.504023  | -0.145682  |   |           |           |           |
| H | -2.451406 | -3.131946  | 0.618710   |   |           |           |           |

Complex  $\text{BE} \cdot \text{Ag}^+$ ,  $E = -5349.545981 E_h$

|    |           |           |           |   |           |           |            |
|----|-----------|-----------|-----------|---|-----------|-----------|------------|
| Ag | -2.924312 | -0.023089 | -0.944349 | H | -1.041324 | -5.633129 | -2.776913  |
| O  | 0.941752  | -4.790287 | -0.238209 | H | -1.414195 | -5.240565 | -1.082547  |
| O  | 1.756328  | -2.236390 | -1.736324 | C | -6.100284 | 6.421968  | -3.918783  |
| O  | -4.765487 | 1.409121  | -1.520065 | C | -4.831497 | 2.656352  | -2.145957  |
| O  | -0.107473 | -1.765932 | 4.090149  | C | -6.063323 | 0.796848  | -1.312356  |
| O  | -0.856519 | -4.975148 | 2.857239  | H | -5.922943 | -0.287991 | -1.454902  |
| O  | 1.152643  | 2.580080  | -2.454626 | H | -6.743940 | 1.149589  | -2.104489  |
| O  | -1.482467 | 3.095409  | -0.591334 | C | -3.151006 | 6.092519  | 0.694879   |
| O  | -2.111946 | 0.571098  | -3.962136 | H | -4.150451 | 6.375155  | 1.033054   |
| N  | -1.258278 | -3.615961 | -2.350212 | C | 0.550926  | -6.640343 | 5.811880   |
| N  | -1.689541 | 0.496345  | 3.126828  | H | 0.611273  | -6.456547 | 6.884622   |
| C  | 2.080374  | -5.367451 | 0.336595  | C | 5.786437  | -1.100661 | 1.924483   |
| C  | 1.947787  | -6.561836 | 1.080053  | C | -4.161127 | 3.851557  | 0.037166   |
| C  | 3.117036  | -7.201643 | 1.513964  | H | -3.879785 | 2.829549  | 0.316268   |
| H  | 3.007049  | -8.140376 | 2.057971  | H | -4.956542 | 4.169061  | 0.730839   |
| C  | -2.389685 | 1.479393  | -4.996755 | C | 2.143577  | -1.577146 | 4.864422   |
| C  | -0.617902 | 5.327170  | -0.224652 | C | 1.028452  | -7.846974 | 5.285626   |
| C  | 0.433215  | -7.013573 | 3.041880  | C | -1.732748 | -0.004044 | 4.499261   |
| N  | -2.037404 | -2.899255 | -1.544865 | H | -2.745703 | 0.167132  | 4.897583   |
| C  | -3.732180 | 1.715089  | -5.371169 | H | -1.029231 | 0.606629  | 5.081889   |
| N  | -2.380500 | -1.815005 | -2.191799 | C | 2.473956  | -0.533509 | 3.807505   |
| C  | 5.334754  | -1.958294 | 0.905830  | H | 2.886521  | 0.362014  | 4.299837   |
| H  | 6.036093  | -2.331985 | 0.156722  | H | 1.550943  | -0.241841 | 3.289725   |
| C  | -1.641927 | 2.714014  | -6.925740 | C | -2.097944 | 7.018249  | 0.782158   |
| H  | -0.813056 | 3.126938  | -7.501232 | C | -3.270503 | 3.447168  | -8.794467  |
| C  | 0.237234  | 6.081498  | -3.129957 | C | 0.714808  | -3.339949 | 5.779222   |
| H  | 0.181073  | 7.021026  | -2.579169 | C | -1.205097 | 1.520416  | 1.273865   |
| C  | 0.257690  | 3.604616  | -4.451226 | C | -1.097686 | -2.982163 | -3.546460  |
| C  | -5.063487 | 5.044934  | -2.020603 | H | -0.505382 | -3.396049 | -4.358621  |
| H  | -4.986399 | 5.963416  | -1.434322 | C | -6.446943 | 6.308034  | -5.416245  |
| N  | -2.198286 | 0.609506  | 1.073733  | H | -6.845272 | 7.268111  | -5.780551  |
| C  | 3.342537  | -4.752729 | 0.214433  | H | -7.217939 | 5.545902  | -5.610109  |
| C  | 4.404701  | -6.686425 | 1.294505  | H | -5.561573 | 6.063930  | -6.023306  |
| C  | 0.589895  | -7.116565 | 1.523446  | C | -0.254126 | 7.341193  | -5.327608  |
| H  | 0.505008  | -8.173202 | 1.220594  | C | -1.823174 | -1.806321 | -3.434940  |
| H  | -0.204519 | -6.556422 | 1.019273  | C | -0.455759 | -4.321445 | 5.649591   |
| C  | 0.719740  | 5.026032  | -0.899917 | H | -1.267484 | -3.896812 | 5.050602   |
| H  | 1.182204  | 4.113167  | -0.512171 | H | -0.862777 | -4.530918 | 6.652246   |
| H  | 1.413355  | 5.844930  | -0.653770 | C | 5.654862  | -7.465726 | 1.750554   |
| C  | 0.673281  | 3.702675  | -3.105770 | C | -6.651989 | 1.090975  | 0.062945   |
| C  | 3.992630  | -2.375083 | 0.806457  | H | -6.609089 | 2.177233  | 0.243741   |
| C  | -0.052182 | 4.796815  | -5.121662 | H | -6.023561 | 0.616346  | 0.835668   |
| H  | -0.354955 | 4.735741  | -6.166487 | C | 1.728532  | -3.620685 | 6.717576   |
| C  | -0.868700 | 1.444846  | 2.612048  | H | 1.555793  | -4.443948 | 7.412213   |
| H  | -0.136750 | 1.977799  | 3.211995  | C | 3.131264  | -1.937459 | 5.783062   |
| C  | -1.336558 | 2.094110  | -5.698764 | H | 4.087582  | -1.412613 | 5.730440   |
| C  | -0.146291 | -5.868439 | 3.632212  | C | -0.355954 | 8.598929  | -4.444681  |
| C  | -0.854659 | 6.614882  | 0.275168  | H | -1.184851 | 8.526676  | -3.720880  |
| H  | -0.020780 | 7.318360  | 0.266097  | H | -0.546898 | 9.478449  | -5.080678  |
| C  | -2.943808 | 2.816670  | -7.426066 | H | 0.573810  | 8.793095  | -3.885905  |
| C  | 3.489985  | -1.027556 | 2.789903  | C | -0.571162 | 2.330562  | 0.184088   |
| C  | 4.475630  | -5.434009 | 0.680994  | H | 0.190847  | 2.966672  | 0.654820   |
| H  | 5.439085  | -4.939764 | 0.560960  | H | -0.059711 | 1.675342  | -0.527923  |
| C  | -5.527675 | 5.106545  | -3.345575 | C | 5.478087  | -7.929888 | 3.212070   |
| C  | 3.076327  | -1.892345 | 1.758890  | H | 5.284573  | -7.072126 | 3.875260   |
| C  | 0.895427  | -2.234917 | 4.920991  | H | 6.387170  | -8.442750 | 3.566477   |
| C  | -0.029041 | 6.057736  | -4.502295 | H | 4.644306  | -8.634417 | 3.328408   |
| C  | 0.066685  | 2.233532  | -5.123976 | C | -1.559648 | 7.239656  | -6.144897  |
| H  | 0.806227  | 2.106336  | -5.933275 | H | -1.566731 | 6.371043  | -6.819597  |
| H  | 0.258046  | 1.453547  | -4.378145 | H | -1.698655 | 8.140645  | -6.765090  |
| C  | -4.705285 | 3.842619  | -1.394837 | H | -2.429989 | 7.150463  | -5.475699  |
| C  | 0.982732  | -7.989152 | 3.887145  | C | 0.951848  | 7.513786  | -6.280769  |
| H  | 1.383692  | -8.898421 | 3.430546  | H | 1.892379  | 7.577393  | -5.708529  |
| N  | -2.490845 | -0.002012 | 2.191810  | H | 0.852745  | 8.437475  | -6.874716  |
| C  | -3.975444 | 2.348522  | -6.594992 | H | 1.040720  | 6.669638  | -6.983177  |
| H  | -5.015752 | 2.483869  | -6.901052 | C | -2.002968 | 3.890314  | -9.548231  |
| C  | -4.894327 | 1.458248  | -4.415783 | H | -1.433590 | 4.647476  | -8.986968  |
| H  | -4.705282 | 0.581194  | -3.786136 | H | -2.281686 | 4.341596  | -10.513291 |
| H  | -5.805512 | 1.258288  | -5.002152 | C | -1.331112 | 3.043907  | -9.760593  |
| C  | -1.681451 | 4.401712  | -0.189264 | C | 2.573595  | 2.514463  | -2.264480  |
| C  | 0.571642  | 4.925785  | -2.413396 | H | 2.726490  | 1.828530  | -1.415099  |
| C  | -5.093204 | 2.693369  | -3.527009 | H | 2.960692  | 3.502910  | -1.958718  |
| C  | 3.546648  | -3.333678 | -0.299317 | C | -5.089364 | 7.575951  | -3.752619  |
| H  | 4.320696  | -3.341503 | -1.083605 | H | -4.157982 | 7.368662  | -4.301549  |
| H  | 2.625208  | -2.973298 | -0.771210 | H | -4.826384 | 7.754876  | -2.699178  |
| C  | -0.029296 | -5.641770 | 5.015877  | H | -5.514521 | 8.511484  | -4.151832  |
| C  | -2.975001 | 4.790625  | 0.204156  | C | -7.398961 | 6.771154  | -3.151750  |
| C  | -1.384323 | -1.489245 | 4.619975  | H | -7.849614 | 7.689232  | -3.563674  |
| H  | -1.452571 | -1.744979 | 5.690535  | H | -7.210065 | 6.942398  | -2.079808  |
| H  | -2.133387 | -2.084124 | 4.071929  | H | -8.141443 | 5.961360  | -3.239803  |
| C  | -5.468562 | 3.921058  | -4.091338 | C | 1.567416  | -8.982556 | 6.182908   |
| H  | -5.724537 | 3.937913  | -5.148516 | C | -2.093259 | -0.760213 | -4.480495  |
| C  | 0.689883  | -5.132608 | -1.589258 | H | -1.329807 | -0.852739 | -5.274550  |
| H  | 0.932484  | -6.197563 | -1.760640 | H | -3.068898 | -0.979431 | -4.957280  |
| H  | 1.324808  | -4.544559 | -2.281761 | C | 2.936446  | -2.914619 | 6.770405   |
| C  | 4.833160  | -0.654544 | 2.856068  | C | 7.255178  | -0.652662 | 2.080583   |
| H  | 5.137463  | 0.026716  | 3.653275  | C | -4.168027 | 4.690946  | -8.592656  |
| C  | -0.796382 | -4.956080 | -1.944271 | H | -5.119918 | 4.439565  | -8.100394  |

|   |           |            |            |   |           |           |          |
|---|-----------|------------|------------|---|-----------|-----------|----------|
| H | -4.413574 | 5.152642   | -9.563008  | H | -2.184323 | -6.320894 | 1.971775 |
| H | -3.661092 | 5.448835   | -7.972161  | C | -2.946063 | -4.294123 | 1.855349 |
| C | 6.939393  | -6.618676  | 1.673511   | H | -3.001263 | -3.403249 | 2.503397 |
| H | 7.177037  | -6.317005  | 0.641362   | H | -2.360484 | -3.984882 | 0.974844 |
| H | 7.791891  | -7.209483  | 2.046059   |   |           |           |          |
| H | 6.871266  | -5.708367  | 2.287643   |   |           |           |          |
| C | 5.833610  | -8.697364  | 0.833258   |   |           |           |          |
| H | 4.934524  | -9.333781  | 0.828046   |   |           |           |          |
| H | 6.684297  | -9.314491  | 1.168636   |   |           |           |          |
| H | 6.030340  | -8.384621  | -0.205574  |   |           |           |          |
| C | -4.014340 | 2.405763   | -9.662307  |   |           |           |          |
| H | -3.382723 | 1.521661   | -9.840632  |   |           |           |          |
| H | -4.283749 | 2.835889   | -10.640579 |   |           |           |          |
| H | -4.944765 | 2.061915   | -9.184444  |   |           |           |          |
| C | 0.578588  | -10.170624 | 6.126018   |   |           |           |          |
| H | 0.447185  | -10.543217 | 5.097863   |   |           |           |          |
| H | -0.413126 | -9.873548  | 6.503902   |   |           |           |          |
| H | 0.942223  | -11.008259 | 6.743915   |   |           |           |          |
| C | -8.101865 | 0.611037   | 0.178294   |   |           |           |          |
| H | -8.756420 | 1.144095   | -0.530153  |   |           |           |          |
| H | -8.498294 | 0.792037   | 1.189512   |   |           |           |          |
| H | -8.198447 | -0.468105  | -0.031519  |   |           |           |          |
| C | 2.959167  | -9.448578  | 5.699936   |   |           |           |          |
| H | 3.343520  | -10.244568 | 6.358498   |   |           |           |          |
| H | 3.681678  | -8.616904  | 5.715048   |   |           |           |          |
| H | 2.935962  | -9.862981  | 4.680121   |   |           |           |          |
| C | 3.337370  | 2.007009   | -3.486249  |   |           |           |          |
| H | 2.872517  | 1.066622   | -3.830511  |   |           |           |          |
| H | 3.227060  | 2.731574   | -4.311630  |   |           |           |          |
| C | 1.713114  | -8.547323  | 7.654722   |   |           |           |          |
| H | 0.743288  | -8.297091  | 8.112165   |   |           |           |          |
| H | 2.375243  | -7.673726  | 7.760364   |   |           |           |          |
| H | 2.151207  | -9.366888  | 8.246150   |   |           |           |          |
| C | 0.892710  | -1.751280  | 0.701187   |   |           |           |          |
| H | -0.025440 | -1.421299  | 1.213534   |   |           |           |          |
| H | 0.615490  | -2.607088  | 0.073931   |   |           |           |          |
| C | -2.327319 | 8.449532   | 1.308310   |   |           |           |          |
| C | 7.794724  | -1.103648  | 3.457305   |   |           |           |          |
| H | 8.859412  | -0.836503  | 3.562303   |   |           |           |          |
| H | 7.694611  | -2.193058  | 3.589980   |   |           |           |          |
| H | 7.256835  | -0.607688  | 4.277478   |   |           |           |          |
| C | 4.817580  | 1.770673   | -3.171976  |   |           |           |          |
| H | 5.310961  | 2.691202   | -2.817322  |   |           |           |          |
| H | 5.365332  | 1.421490   | -4.061235  |   |           |           |          |
| H | 4.947789  | 1.006882   | -2.386105  |   |           |           |          |
| C | 4.045630  | -3.177988  | 7.810697   |   |           |           |          |
| C | 1.455201  | -0.630676  | -0.171397  |   |           |           |          |
| H | 1.410058  | 0.329960   | 0.366272   |   |           |           |          |
| H | 2.522038  | -0.797417  | -0.373362  |   |           |           |          |
| C | -3.348952 | 8.454123   | 2.464867   |   |           |           |          |
| H | -3.034226 | 7.784341   | 3.280883   |   |           |           |          |
| H | -4.353587 | 8.145442   | 2.137727   |   |           |           |          |
| H | -3.445496 | 9.470001   | 2.879299   |   |           |           |          |
| C | 0.716721  | -0.549958  | -1.501742  |   |           |           |          |
| H | -0.364216 | -0.410387  | -1.355532  |   |           |           |          |
| H | 0.851159  | -1.477343  | -2.080913  |   |           |           |          |
| H | 1.059714  | 0.286252   | -2.119491  |   |           |           |          |
| C | 7.329478  | 0.890715   | 2.013404   |   |           |           |          |
| H | 6.707938  | 1.364508   | 2.786703   |   |           |           |          |
| H | 6.987964  | 1.267127   | 1.034748   |   |           |           |          |
| H | 8.364598  | 1.235896   | 2.172950   |   |           |           |          |
| C | -1.018782 | 9.078030   | 1.834180   |   |           |           |          |
| H | -1.223741 | 10.070440  | 2.265970   |   |           |           |          |
| H | -0.271112 | 9.222855   | 1.040204   |   |           |           |          |
| H | -0.562366 | 8.456592   | 2.621649   |   |           |           |          |
| C | 8.161050  | -1.233873  | 0.982011   |   |           |           |          |
| H | 9.191972  | -0.871087  | 1.117543   |   |           |           |          |
| H | 7.833791  | -0.920951  | -0.022111  |   |           |           |          |
| H | 8.191898  | -2.336245  | 1.006489   |   |           |           |          |
| C | -2.882418 | 9.312961   | 0.150024   |   |           |           |          |
| H | -3.814283 | 8.880329   | -0.245966  |   |           |           |          |
| H | -2.164118 | 9.380142   | -0.683278  |   |           |           |          |
| H | -3.104390 | 10.337055  | 0.492888   |   |           |           |          |
| C | 5.308262  | -3.728763  | 7.107724   |   |           |           |          |
| H | 5.097113  | -4.678495  | 6.589286   |   |           |           |          |
| H | 6.109696  | -3.909951  | 7.843458   |   |           |           |          |
| H | 5.697092  | -3.024372  | 6.360480   |   |           |           |          |
| C | -4.355173 | -4.725480  | 1.432571   |   |           |           |          |
| H | -4.900968 | -3.892381  | 0.962378   |   |           |           |          |
| H | -4.953299 | -5.069602  | 2.293571   |   |           |           |          |
| H | -4.329454 | -5.554782  | 0.704896   |   |           |           |          |
| C | 3.598197  | -4.187332  | 8.880358   |   |           |           |          |
| H | 2.704206  | -3.833141  | 9.417508   |   |           |           |          |
| H | 4.398794  | -4.337464  | 9.622727   |   |           |           |          |
| H | 3.366866  | -5.169573  | 8.439910   |   |           |           |          |
| C | 4.402623  | -1.848121  | 8.521976   |   |           |           |          |
| H | 4.810851  | -1.103681  | 7.821359   |   |           |           |          |
| H | 5.165519  | -2.020175  | 9.299542   |   |           |           |          |
| H | 3.516677  | -1.407062  | 9.006686   |   |           |           |          |
| C | -2.194394 | -5.397264  | 2.583995   |   |           |           |          |
| H | -2.704723 | -5.661169  | 3.531950   |   |           |           |          |



Complex  $\text{BF} \cdot \text{Ag}^+$ ,  $E = -4721.484507 E_h$

|    |           |           |           |   |           |           |            |
|----|-----------|-----------|-----------|---|-----------|-----------|------------|
| Ag | 0.900447  | -0.399167 | -0.686299 | H | -2.682937 | -0.336984 | 3.041963   |
| O  | -5.076421 | 1.957173  | -5.204359 | C | 4.886626  | -2.863568 | 5.570968   |
| O  | 1.640881  | 1.776008  | 1.759130  | C | -2.318299 | -3.309386 | -1.074514  |
| O  | -0.742277 | -1.587325 | 1.751905  | H | -3.233233 | -3.850558 | -0.848081  |
| O  | -2.508025 | -2.480411 | -4.779164 | C | 1.279672  | -3.648557 | 2.050488   |
| O  | -0.228078 | 3.133871  | -4.887420 | H | 1.563612  | -4.712796 | 2.011347   |
| O  | -1.563697 | 1.803790  | 2.930318  | H | 1.024130  | -3.335121 | 1.030892   |
| O  | -0.530873 | -0.160019 | -8.632833 | C | 0.483030  | 0.215542  | 8.076007   |
| O  | 2.731675  | -1.605511 | 0.471532  | C | -3.107878 | 3.818005  | -7.092005  |
| N  | -1.605584 | -3.501557 | -2.220513 | H | -4.132231 | 4.189751  | -7.026492  |
| N  | 1.559909  | 3.348314  | -2.493117 | C | 0.429350  | 4.329860  | -4.525529  |
| N  | -0.523783 | -2.729693 | -2.244651 | H | -0.223935 | 4.970848  | -3.901045  |
| N  | -0.532000 | -2.028492 | -1.147854 | H | 0.703159  | 4.920874  | -5.419132  |
| N  | 1.359559  | 1.686398  | -1.197280 | C | -1.747928 | -2.131043 | 3.879100   |
| N  | 1.575283  | 2.023246  | -2.439776 | C | -6.329118 | 2.408782  | -4.678346  |
| C  | -4.087443 | 0.302003  | -3.750496 | H | -6.153887 | 3.227199  | -3.953790  |
| C  | -4.353975 | -1.235981 | -5.745450 | H | -6.821016 | 1.588621  | -4.117998  |
| C  | 1.221346  | 2.793142  | -0.415984 | C | 0.821480  | 0.637823  | -6.799381  |
| C  | 2.516570  | 2.208137  | 2.738418  | C | -0.506169 | 2.765709  | -7.248603  |
| C  | -3.216906 | 2.599242  | -3.815530 | C | 5.474204  | 3.755369  | 5.572817   |
| C  | 3.826832  | 1.693477  | 2.715433  | C | 1.728604  | 4.029220  | -3.778316  |
| C  | -0.808971 | -2.413606 | 2.865006  | H | 2.376286  | 3.385972  | -4.388420  |
| C  | -1.470977 | 0.203559  | 4.737585  | H | 2.259654  | 4.973348  | -3.586508  |
| C  | 2.106218  | 3.084924  | 3.769892  | C | -3.262814 | -1.706874 | -8.293217  |
| C  | 0.069970  | -3.504778 | 2.972904  | H | -2.825123 | -1.864091 | -9.280663  |
| C  | -1.015063 | 1.393551  | 4.136077  | C | -1.125487 | -2.654953 | -7.311287  |
| C  | -1.613583 | -2.342709 | -0.381715 | H | -0.983459 | -3.594610 | -6.755575  |
| C  | 0.434390  | 1.783230  | 6.029995  | H | -0.944544 | -2.883348 | -8.372901  |
| H  | 1.202629  | 2.395993  | 6.501839  | C | 0.582049  | -1.895446 | -5.600988  |
| C  | -0.995620 | -0.125671 | 6.011953  | H | 0.463208  | -2.861474 | -5.108302  |
| H  | -1.360190 | -1.045295 | 6.468022  | C | 0.894821  | 2.753480  | 1.049819   |
| C  | -0.057993 | 0.656544  | 6.700196  | H | 1.079125  | 3.760712  | 1.451680   |
| C  | 2.467874  | -2.819871 | 2.553834  | H | -0.173247 | 2.515516  | 1.189490   |
| C  | 4.764132  | 2.211455  | 3.624263  | C | -1.287090 | 2.935645  | -8.401074  |
| H  | 5.785423  | 1.835185  | 3.560601  | H | -0.878801 | 2.625670  | -9.364529  |
| C  | -3.155654 | -1.963374 | -5.900031 | C | 1.486557  | 0.338026  | -5.603108  |
| C  | -2.364697 | 3.677724  | -5.912097 | H | 2.063630  | 1.116415  | -5.103489  |
| C  | -1.938942 | -3.087564 | 4.879912  | C | -1.517613 | -5.302794 | 6.052754   |
| H  | -2.705237 | -2.889233 | 5.633057  | C | -2.564716 | 3.487865  | -8.332689  |
| C  | -3.190596 | 0.024280  | -2.710813 | H | -3.152574 | 3.631529  | -9.242403  |
| H  | -3.143079 | -0.991276 | -2.318606 | C | 0.843942  | 2.065251  | -7.340287  |
| C  | 3.881506  | -0.817439 | 2.446813  | H | 1.167118  | 2.083342  | -8.392626  |
| C  | -1.181068 | -4.266471 | 4.960614  | H | 1.604492  | 2.623031  | -6.773683  |
| C  | 0.636426  | 3.372220  | 4.082817  | C | -4.493739 | -1.063897 | -8.170619  |
| H  | 0.053049  | 3.648723  | 3.197590  | H | -5.030346 | -0.729646 | -9.061604  |
| H  | 0.593378  | 4.236830  | 4.763235  | C | -7.223440 | 2.886001  | -5.814149  |
| C  | 3.003060  | -1.733554 | 1.834140  | C | -8.598644 | 3.349727  | -5.322767  |
| C  | 4.438459  | 3.182196  | 4.581228  | C | 5.138961  | 3.269318  | 7.004537   |
| C  | 4.209559  | 0.537273  | 1.802515  | H | 4.122827  | 3.565182  | 7.311787   |
| H  | 3.674902  | 0.619075  | 0.849039  | H | 5.843434  | 3.700637  | 7.733873   |
| H  | 5.289029  | 0.599282  | 1.586116  | H | 5.206216  | 2.171704  | 7.076634   |
| C  | 3.041031  | -3.113829 | 3.799172  | C | 5.584777  | -1.716835 | 6.327896   |
| H  | 2.670654  | -3.991931 | 4.328496  | H | 6.129265  | -2.123434 | 7.194636   |
| C  | -3.045479 | 3.910896  | -4.566331 | H | 4.856917  | -0.980388 | 6.699734   |
| H  | -4.016868 | 4.390826  | -4.753022 | H | 6.323817  | -1.189758 | 5.705488   |
| H  | -2.467070 | 4.605658  | -3.937020 | C | -1.888518 | -1.620862 | 0.904976   |
| C  | -4.141106 | 1.621352  | -4.248444 | H | -2.163298 | -0.575666 | 0.680487   |
| C  | -1.038107 | 3.206711  | -6.019750 | H | -2.744459 | -2.095204 | 1.407555   |
| C  | -0.018685 | 2.169037  | 4.760329  | C | 0.293205  | -0.356956 | -9.783495  |
| C  | 4.423900  | -1.166567 | 3.690918  | H | 0.728006  | -1.375183 | -9.766379  |
| H  | 5.145369  | -0.485777 | 4.144245  | H | 1.145855  | 0.349487  | -9.770941  |
| C  | -0.150528 | -4.422509 | 4.019958  | C | 1.397210  | -0.925396 | -5.021440  |
| H  | 0.500818  | -5.296450 | 4.067808  | H | 1.920384  | -1.138531 | -4.088403  |
| C  | -2.353956 | 2.281122  | -2.760170 | C | 5.969967  | -3.836700 | 5.041995   |
| H  | -1.653630 | 3.039104  | -2.402915 | H | 6.649322  | -3.326734 | 4.339962   |
| C  | 4.089581  | -2.360246 | 4.349768  | H | 5.514831  | -4.687615 | 4.510254   |
| C  | -2.358874 | 1.012052  | -2.185609 | H | 6.573776  | -4.235693 | 5.874197   |
| H  | -1.673010 | 0.779654  | -1.367890 | C | -0.653801 | -0.328594 | 8.967013   |
| C  | -4.891629 | -0.829878 | -4.377996 | H | -1.134858 | -1.221896 | 8.538148   |
| H  | -5.944965 | -0.535996 | -4.497967 | H | -1.434504 | 0.431289  | 9.128547   |
| H  | -4.882682 | -1.684039 | -3.683257 | H | -0.254145 | -0.622566 | 9.950597   |
| C  | -2.553830 | -2.140259 | -7.164084 | C | 3.983951  | -3.603788 | 6.578415   |
| C  | 3.090656  | 3.574842  | 4.642775  | H | 4.581210  | -3.943870 | 7.439204   |
| H  | 2.771312  | 4.277765  | 5.417257  | H | 3.510402  | -4.496444 | 6.143589   |
| C  | -1.924064 | -4.338055 | -3.377822 | H | 3.188198  | -2.942210 | 6.955319   |
| H  | -2.282845 | -5.311592 | -3.011232 | C | 5.449011  | 5.299389  | 5.540987   |
| H  | -0.975479 | -4.488497 | -3.909618 | H | 5.708546  | 5.682691  | 4.540731   |
| C  | -0.110896 | -1.641997 | -6.790814 | H | 6.182453  | 5.704675  | 6.255962   |
| C  | 0.076214  | -0.389657 | -7.418317 | H | 4.466288  | 5.710051  | 5.819172   |
| C  | 1.348270  | 3.883072  | -1.257787 | C | -0.547454 | -0.148430 | -11.034500 |
| H  | 1.314990  | 4.954064  | -1.073014 | H | -1.074567 | 0.815985  | -10.940041 |
| C  | -2.967446 | -3.731178 | -4.314734 | H | -1.335204 | -0.920907 | -11.068342 |
| H  | -3.121492 | -4.442112 | -5.148268 | C | 6.909348  | 3.300782  | 5.240468   |
| H  | -3.939484 | -3.636266 | -3.790218 | H | 7.039705  | 2.213127  | 5.359392   |
| C  | -5.010690 | -0.796574 | -6.903732 | H | 7.621542  | 3.786782  | 5.924430   |
| C  | -5.936111 | -0.226771 | -6.799115 | H | 7.199861  | 3.574083  | 4.213468   |
| C  | -2.408271 | -0.764998 | 4.011894  | C | 1.521710  | -0.909061 | 7.837326   |
| H  | -3.339844 | -0.882846 | 4.589935  | H | 1.917695  | -1.289285 | 8.794755   |

|   |           |           |            |
|---|-----------|-----------|------------|
| H | 2.366559  | -0.535750 | 7.237247   |
| H | 1.082033  | -1.757345 | 7.287812   |
| C | 1.173080  | 1.370948  | 8.828977   |
| H | 0.483789  | 2.212629  | 9.002803   |
| H | 2.052285  | 1.756178  | 8.290120   |
| H | 1.529526  | 1.016262  | 9.808923   |
| C | -2.926452 | -5.881930 | 5.771251   |
| H | -3.702202 | -5.101803 | 5.830419   |
| H | -3.177094 | -6.658690 | 6.511439   |
| H | -2.980212 | -6.339292 | 4.769988   |
| C | 0.278818  | -0.179157 | -12.321041 |
| H | 0.804250  | -1.140833 | -12.447740 |
| H | 1.043776  | 0.615765  | -12.333345 |
| H | -0.363724 | -0.033150 | -13.203089 |
| C | -0.502046 | -6.457741 | 6.081699   |
| H | -0.486167 | -7.020113 | 5.134834   |
| H | -0.763021 | -7.168729 | 6.880810   |
| H | 0.517550  | -6.090015 | 6.284390   |
| C | -1.527527 | -4.639398 | 7.450340   |
| H | -0.531719 | -4.253075 | 7.720140   |
| H | -1.822819 | -5.376821 | 8.214771   |
| H | -2.240965 | -3.802791 | 7.517367   |
| H | -8.515925 | 4.179619  | -4.600997  |
| H | -9.147352 | 2.532420  | -4.824478  |
| H | -9.220575 | 3.703297  | -6.159778  |
| H | -7.336951 | 2.067505  | -6.545254  |
| H | -6.711155 | 3.704976  | -6.347683  |
| C | 3.852088  | -2.003701 | -0.346101  |
| C | -2.776016 | 2.552153  | 3.072083   |
| H | 4.098553  | -3.057837 | -0.123977  |
| H | 4.733303  | -1.397466 | -0.071907  |
| C | 3.526753  | -1.817717 | -1.817193  |
| H | -2.582732 | 3.463936  | 3.670084   |
| H | -3.516080 | 1.954483  | 3.638041   |
| C | -3.326547 | 2.915169  | 1.701556   |
| H | 3.189906  | -0.776929 | -1.975128  |
| H | 2.684441  | -2.474787 | -2.092231  |
| C | 4.729038  | -2.094555 | -2.720519  |
| H | -3.459835 | 1.992993  | 1.109778   |
| H | -2.579929 | 3.523237  | 1.160694   |
| C | -4.652429 | 3.675173  | 1.798590   |
| H | 5.103301  | -3.124830 | -2.598297  |
| H | 5.562717  | -1.409398 | -2.497443  |
| H | 4.458854  | -1.958852 | -3.779096  |
| H | -4.540841 | 4.612136  | 2.369058   |
| H | -5.424958 | 3.072483  | 2.304376   |
| H | -5.037217 | 3.938195  | 0.801062   |

Complex  $CD \cdot Ag^+$ ,  $E = -4485.989710 E_h$

|   |           |           |           |   |           |           |           |
|---|-----------|-----------|-----------|---|-----------|-----------|-----------|
| C | 1.967380  | -6.476587 | 1.383132  | C | -0.296125 | 3.717390  | 4.314447  |
| C | 0.586990  | -3.005661 | -2.488942 | C | 3.670986  | 5.902266  | -3.796805 |
| C | 0.931626  | -4.327059 | -2.804458 | C | 3.577983  | 7.059637  | 4.194356  |
| C | 1.945451  | -4.950400 | -2.048173 | C | 2.835895  | 7.118847  | -4.261324 |
| C | 2.517311  | -4.313161 | -0.924607 | C | 4.034994  | 5.035076  | -5.027071 |
| C | 2.131737  | -2.996283 | -0.641636 | C | 4.981974  | 6.424175  | -3.176577 |
| C | 1.191867  | -2.330483 | -1.427744 | C | 2.874932  | 7.635486  | 5.438571  |
| C | 3.528649  | -5.005056 | -0.023504 | C | 3.705461  | 8.184171  | 3.141010  |
| C | 3.110584  | -6.341324 | 0.570397  | C | 4.991406  | 6.588089  | 4.622676  |
| C | 3.881230  | -7.484948 | 0.323597  | O | 0.662099  | 2.407676  | -0.406022 |
| C | 3.522484  | -8.723671 | 0.853906  | C | -1.378870 | -6.594138 | -2.702803 |
| C | 2.352340  | -8.840709 | 1.602233  | C | -1.879527 | -6.546489 | 2.547694  |
| C | 1.539247  | -7.728726 | 1.866066  | C | -1.044387 | -7.507732 | 1.951090  |
| C | 0.245978  | -7.912776 | 2.649734  | C | -1.452263 | -8.089410 | 0.730100  |
| O | 2.347945  | -6.212877 | -2.407676 | C | -2.615149 | -7.634469 | 0.054531  |
| N | -0.203259 | -2.996643 | 2.455823  | C | -3.431134 | -6.697611 | 0.697287  |
| N | -0.440426 | -1.722736 | 2.586260  | C | -3.086649 | -6.156357 | 1.944362  |
| N | 0.632906  | -1.175093 | 3.149712  | C | -2.983426 | -8.081816 | -1.353103 |
| C | 1.591886  | -2.115039 | 3.380006  | C | -1.931579 | -7.863727 | -2.433665 |
| C | 1.039718  | -3.299133 | 2.923705  | C | -1.508633 | -8.943725 | -3.220884 |
| C | 1.576405  | -4.699098 | 2.915525  | C | -0.558296 | -8.773473 | -4.228354 |
| O | 1.237755  | -5.328462 | 1.684142  | C | 0.001477  | -7.515174 | -4.445231 |
| C | 0.634072  | 0.264967  | 3.405859  | C | -0.384632 | -6.403434 | -3.682824 |
| C | 1.687311  | 1.049447  | 2.597518  | C | 0.244451  | -5.042387 | -3.960137 |
| O | 1.121036  | 2.284384  | 2.184451  | O | -0.656161 | -9.058419 | 0.191846  |
| C | 1.594331  | 4.544664  | -3.176988 | N | -2.512366 | -3.084040 | -0.605232 |
| C | 0.845268  | 3.705154  | -2.350999 | N | -2.378924 | -1.794990 | -0.478481 |
| C | 1.379477  | 3.323193  | -1.098743 | N | -2.642194 | -1.246839 | -1.659082 |
| C | 2.621574  | 3.834069  | -0.668301 | C | -2.944675 | -2.203106 | -2.578903 |
| C | 3.326115  | 4.687923  | -1.535822 | C | -2.852049 | -3.397670 | -1.887216 |
| C | 2.854568  | 5.047752  | -2.804452 | C | -2.965327 | -4.818971 | -2.345351 |
| C | -0.501313 | 3.146387  | -2.801809 | O | -1.775757 | -5.495657 | -1.954512 |
| C | 3.272170  | 3.409106  | 0.651805  | C | -2.357890 | 0.178890  | -1.855128 |
| C | 2.734457  | 4.048484  | 1.930372  | C | -2.938333 | 1.049561  | -0.727897 |
| C | 1.642059  | 3.499173  | 2.629302  | O | -2.117945 | 2.184763  | -0.502365 |
| C | 1.017667  | 4.176702  | 3.687729  | C | -2.129224 | 5.476575  | 4.323533  |
| C | 1.643135  | 5.343384  | 4.160420  | C | -1.556074 | 4.347145  | 3.721302  |
| C | 2.815716  | 5.859951  | 3.591992  | C | -2.183042 | 3.783260  | 2.590414  |
| C | 3.308472  | 5.218456  | 2.440606  | C | -3.338536 | 4.390326  | 2.045301  |

|   |           |            |           |    |           |            |           |
|---|-----------|------------|-----------|----|-----------|------------|-----------|
| C | -3.859725 | 5.524020   | 2.679326  | H  | -3.042593 | 7.014505   | 6.521541  |
| C | -3.296062 | 6.083568   | 3.837438  | H  | -3.717151 | 8.627608   | 6.216217  |
| C | -4.065902 | 3.807456   | 0.833632  | H  | -5.257219 | 5.969357   | 5.802628  |
| C | -3.465277 | 4.168205   | -0.522339 | H  | -6.015609 | 6.409130   | 4.256586  |
| C | -2.447461 | 3.395523   | -1.114302 | H  | -5.909726 | 7.612495   | 5.565689  |
| C | -1.733202 | 3.849201   | -2.235442 | H  | -2.807215 | 6.629081   | -5.079467 |
| C | -2.191099 | 5.024247   | -2.857465 | H  | -2.034617 | 7.759758   | -3.935455 |
| C | -3.300705 | 5.746087   | -2.398010 | H  | -3.481394 | 8.251194   | -4.845387 |
| C | -3.886452 | 5.319880   | -1.192831 | H  | -3.329634 | 8.488050   | -1.781830 |
| C | -3.996403 | 7.261275   | 4.546736  | H  | -4.962974 | 7.844094   | -1.483091 |
| C | -3.923843 | 6.909470   | -3.194465 | H  | -4.685838 | 8.926573   | -2.853940 |
| C | -4.201262 | 8.430245   | 3.556117  | H  | -5.945096 | 6.035903   | -3.061998 |
| C | -3.185009 | 7.785046   | 5.746780  | H  | -5.047329 | 5.560786   | -4.522693 |
| C | -5.374780 | 6.784404   | 5.070406  | H  | -5.738438 | 7.200353   | -4.396521 |
| C | -3.002872 | 7.406929   | -4.324464 | H  | -1.832887 | 2.494963   | 1.146356  |
| C | -4.240484 | 8.105322   | -2.269767 | H  | 4.396510  | -5.879685  | -2.615119 |
| C | -5.241709 | 6.395108   | -3.829747 | H  | 3.440196  | -5.647754  | -4.091035 |
| O | -1.669059 | 2.622381   | 2.105683  | C  | 3.810864  | -7.729472  | -3.575631 |
| H | -0.168354 | -2.500855  | -3.096477 | H  | -2.005000 | -10.501000 | -0.502757 |
| H | 2.584731  | -2.485930  | 0.212869  | H  | -1.502359 | -10.681362 | 1.190859  |
| H | 3.787776  | -4.300796  | 0.784427  | C  | -0.020703 | -11.328673 | -0.275257 |
| H | 4.469047  | -5.170601  | -0.572762 | H  | 0.917672  | -1.298197  | -1.194500 |
| H | 4.776512  | -7.394669  | -0.297974 | H  | -3.777412 | -5.489764  | 2.468015  |
| H | 4.142924  | -9.602513  | 0.662228  | H  | 3.005290  | -8.084997  | -4.238982 |
| H | 2.054227  | -9.815650  | 1.994799  | H  | 3.746288  | -8.344875  | -2.663153 |
| H | 0.294351  | -7.353650  | 3.597891  | C  | 5.175384  | -7.898873  | -4.247409 |
| H | 0.183551  | -8.974598  | 2.937402  | H  | 0.796962  | -11.288504 | 0.463489  |
| C | 3.541959  | -6.283581  | -3.190555 | H  | 0.393732  | -10.921856 | -1.213237 |
| H | 2.550353  | -1.882818  | 3.837276  | C  | -0.491029 | -12.771785 | -0.477909 |
| H | 1.147704  | -5.266290  | 3.763984  | H  | 5.995584  | -7.611292  | -3.567998 |
| H | 2.669977  | -4.677623  | 3.064351  | H  | 5.264705  | -7.275817  | -5.152435 |
| H | 0.744846  | 0.430897   | 4.488051  | H  | 5.346844  | -8.943198  | -4.550871 |
| H | -0.356589 | 0.619566   | 3.090552  | H  | -1.277621 | -12.839951 | -1.248513 |
| H | 1.951985  | 0.475738   | 1.690722  | H  | -0.902581 | -13.204788 | 0.449749  |
| H | 2.609009  | 1.224298   | 3.176599  | H  | 0.340711  | -13.415467 | -0.802804 |
| H | 1.184807  | 4.795628   | -4.158825 | Ag | -1.573078 | -4.251624  | 1.124644  |
| H | 4.298351  | 5.048905   | -1.198925 |    |           |            |           |
| H | -0.533892 | 2.081148   | -2.542752 |    |           |            |           |
| H | -0.547052 | 3.219718   | -3.899731 |    |           |            |           |
| H | 4.341910  | 3.656175   | 0.582258  |    |           |            |           |
| H | 3.219784  | 2.310504   | 0.733755  |    |           |            |           |
| H | 1.188283  | 5.843028   | 5.015813  |    |           |            |           |
| H | 4.182528  | 5.626006   | 1.926543  |    |           |            |           |
| H | -0.265370 | 3.973650   | 5.384951  |    |           |            |           |
| H | -0.384499 | 2.626642   | 4.243315  |    |           |            |           |
| H | 2.532686  | 7.745285   | -3.407195 |    |           |            |           |
| H | 1.921871  | 6.811726   | -4.792473 |    |           |            |           |
| H | 3.421268  | 7.745092   | -4.954856 |    |           |            |           |
| H | 3.137857  | 4.649660   | -5.537232 |    |           |            |           |
| H | 4.650427  | 4.170327   | -4.731035 |    |           |            |           |
| H | 4.610322  | 5.624009   | -5.761213 |    |           |            |           |
| H | 5.655067  | 5.602945   | -2.883119 |    |           |            |           |
| H | 4.796876  | 7.050746   | -2.289721 |    |           |            |           |
| H | 5.522531  | 7.041748   | -3.911569 |    |           |            |           |
| H | 2.786877  | 6.889671   | 6.245023  |    |           |            |           |
| H | 1.866444  | 8.011014   | 5.205267  |    |           |            |           |
| H | 3.457885  | 8.481420   | 5.835343  |    |           |            |           |
| H | 2.715301  | 8.536676   | 2.810051  |    |           |            |           |
| H | 4.257530  | 7.851319   | 2.248926  |    |           |            |           |
| H | 4.250457  | 9.044502   | 3.562514  |    |           |            |           |
| H | 5.571255  | 6.192617   | 3.773778  |    |           |            |           |
| H | 4.928379  | 5.792312   | 5.382756  |    |           |            |           |
| H | 5.561260  | 7.426480   | 5.057355  |    |           |            |           |
| H | 0.845900  | 2.404032   | 0.558179  |    |           |            |           |
| H | -1.614042 | -6.148897  | 3.530776  |    |           |            |           |
| H | -4.354955 | -6.371259  | 0.212101  |    |           |            |           |
| H | -3.909348 | -7.552817  | -1.631515 |    |           |            |           |
| H | -3.257464 | -9.147953  | -1.359967 |    |           |            |           |
| H | -1.935219 | -9.933485  | -3.038271 |    |           |            |           |
| H | -0.243107 | -9.625269  | -4.835822 |    |           |            |           |
| H | 0.760243  | -7.384768  | -5.221895 |    |           |            |           |
| H | 0.965247  | -5.181610  | -4.782471 |    |           |            |           |
| H | -0.524507 | -4.360097  | -4.360212 |    |           |            |           |
| C | -1.142891 | -10.407057 | 0.180484  |    |           |            |           |
| H | -3.179413 | -1.972147  | -3.614743 |    |           |            |           |
| H | -3.106430 | -4.851358  | -3.438875 |    |           |            |           |
| H | -3.847997 | -5.296760  | -1.882524 |    |           |            |           |
| H | -2.733587 | 0.463435   | -2.847230 |    |           |            |           |
| H | -1.265425 | 0.303682   | -1.842080 |    |           |            |           |
| H | -2.921267 | 0.465356   | 0.203597  |    |           |            |           |
| H | -3.976670 | 1.347663   | -0.948367 |    |           |            |           |
| H | -1.642458 | 5.872873   | 5.215746  |    |           |            |           |
| H | -4.770323 | 5.960035   | 2.259361  |    |           |            |           |
| H | -5.098911 | 4.184962   | 0.854596  |    |           |            |           |
| H | -4.133867 | 2.715167   | 0.952802  |    |           |            |           |
| H | -1.658280 | 5.356920   | -3.749131 |    |           |            |           |
| H | -4.710125 | 5.888335   | -0.756081 |    |           |            |           |
| H | -4.836010 | 8.141276   | 2.704922  |    |           |            |           |
| H | -3.239359 | 8.786537   | 3.152517  |    |           |            |           |
| H | -4.696669 | 9.278282   | 4.057354  |    |           |            |           |
| H | -2.192554 | 8.150795   | 5.439313  |    |           |            |           |

Complex  $\text{CF} \cdot \text{Ag}^+$  (isomer 1)  $E = -4093.383850 E_h$

|    |           |           |           |   |           |           |           |
|----|-----------|-----------|-----------|---|-----------|-----------|-----------|
| Ag | -0.623702 | 1.635766  | 1.131875  | H | 3.009348  | -4.376789 | 3.608566  |
| O  | -3.581811 | 1.204848  | 1.541677  | H | 4.514512  | -5.240661 | 3.291657  |
| O  | -0.679591 | 4.585750  | -0.249428 | C | -1.787239 | 2.546257  | -2.908362 |
| O  | 5.821037  | -4.618800 | 0.895797  | H | -0.868784 | 2.800153  | -3.445698 |
| O  | -3.383545 | 5.323247  | 2.853648  | C | -7.093986 | 3.407218  | 2.069593  |
| O  | 1.096354  | -4.121161 | 1.698541  | H | -8.036187 | 3.933194  | 2.241033  |
| O  | 4.486148  | -1.130899 | -2.510638 | C | 7.549172  | -6.293279 | 0.940889  |
| O  | 1.648512  | -5.426640 | -2.925029 | H | 7.143642  | -6.548992 | -0.052575 |
| O  | -4.658901 | 4.217340  | -1.335377 | H | 7.037205  | -6.954869 | 1.659479  |
| N  | 2.714370  | 1.838165  | -1.346260 | C | 0.188559  | -4.275579 | -1.445199 |
| N  | -0.973702 | -2.191291 | 2.901581  | C | -6.841904 | 2.791386  | 0.844857  |
| N  | 1.078432  | 2.346707  | -0.096609 | H | -7.586736 | 2.847832  | 0.046463  |
| N  | 1.896516  | 1.377467  | -0.413953 | C | -2.280078 | 7.782135  | 0.663550  |
| N  | -1.283337 | -0.338783 | 1.922585  | H | -2.323254 | 8.480969  | 1.503458  |
| C  | 4.688575  | -2.500038 | -2.564108 | C | -0.329737 | -1.936385 | -1.842632 |
| C  | -4.726866 | 1.992951  | 1.664835  | H | -0.899851 | -1.042120 | -1.589324 |
| C  | 1.361724  | 3.461458  | -0.824047 | C | 1.276035  | -5.908344 | -4.219210 |
| C  | -1.467333 | 5.734185  | -0.302905 | H | 1.763748  | -5.309413 | -5.008982 |
| C  | -2.315654 | 4.514022  | 3.126825  | H | 0.184684  | -5.794169 | -4.361571 |
| C  | -2.195419 | 5.980573  | -1.484533 | C | 3.475060  | -0.502253 | -1.745224 |
| C  | 5.288840  | -3.399567 | 1.229481  | H | 3.492384  | -0.828660 | -0.695765 |
| C  | 3.031494  | -5.556374 | 1.786492  | H | 2.471940  | -0.705140 | -2.138881 |
| C  | 5.686524  | -2.219340 | 0.556559  | C | -3.906788 | 6.117496  | 3.921277  |
| N  | -0.359082 | -1.130201 | 2.395995  | H | -3.085632 | 6.673389  | 4.413015  |
| C  | 3.941457  | -3.306403 | -3.455745 | H | -4.366496 | 5.471052  | 4.693439  |
| C  | 5.791916  | -3.028384 | -1.853444 | C | 5.585142  | -5.084523 | -3.139622 |
| C  | 1.412407  | -3.018893 | -3.177876 | H | 5.966555  | -6.071477 | -3.411711 |
| C  | 1.794122  | -5.222337 | 1.197513  | C | 5.224185  | -0.996101 | 1.064582  |
| C  | -4.919181 | 2.677606  | 2.882151  | H | 5.572621  | -0.072432 | 0.592057  |
| C  | 6.488577  | -2.245917 | -0.745798 | C | -0.507639 | -3.109794 | -1.112032 |
| H  | 7.486814  | -2.683337 | -0.588453 | H | -1.208302 | -3.131743 | -0.273092 |
| H  | 6.652029  | -1.207002 | -1.069265 | C | 1.690329  | -7.366213 | -4.359602 |
| C  | -5.646446 | 2.097355  | 0.601183  | H | 1.093470  | -7.982687 | -3.666334 |
| C  | -2.508646 | 3.227424  | 3.678482  | H | 2.740407  | -7.466132 | -4.035516 |
| C  | 1.086687  | -4.238074 | -2.536141 | C | 0.163946  | -4.456428 | 2.705132  |
| C  | 2.630591  | -2.857344 | -4.096803 | H | 0.588578  | -5.210908 | 3.394655  |
| H  | 2.494942  | -3.418694 | -5.034869 | H | -0.753194 | -4.903245 | 2.272237  |
| H  | 2.699831  | -1.797920 | -4.388409 | C | 3.790280  | 0.989569  | -1.868576 |
| C  | 4.290795  | -3.370996 | 2.229774  | H | 4.723876  | 1.231562  | -1.336340 |
| C  | -3.798360 | 3.239296  | -1.767210 | H | 3.935441  | 1.239859  | -2.929286 |
| C  | 4.435052  | -4.586833 | -3.745389 | C | 1.251455  | -5.973970 | 0.134046  |
| H  | 3.912354  | -5.196474 | -4.482694 | C | -3.286915 | 0.887696  | -2.008356 |
| C  | -1.371509 | 2.452413  | 3.951803  | H | -3.552164 | -0.162883 | -1.854284 |
| H  | -1.502933 | 1.465419  | 4.401758  | C | -0.830195 | 6.338976  | 2.131437  |
| C  | -2.929451 | 7.170707  | -1.573713 | H | 0.256017  | 6.505431  | 2.020726  |
| H  | -3.482225 | 7.388640  | -2.491706 | H | -1.168908 | 7.119023  | 2.832335  |
| C  | 3.821341  | -2.125426 | 2.665723  | C | 3.660466  | -6.736220 | 1.365536  |
| H  | 3.062469  | -2.087970 | 3.451882  | H | 4.607340  | -7.019177 | 1.827561  |
| C  | 6.232523  | -4.318984 | -2.172811 | C | 3.107022  | -7.535566 | 0.367607  |
| H  | 7.111382  | -4.719334 | -1.664657 | H | 3.611310  | -8.452394 | 0.052554  |
| C  | -1.026283 | 4.978216  | 2.778801  | C | 4.318863  | -0.939368 | 2.125589  |
| C  | -2.595876 | 3.583716  | -2.423844 | H | 3.965726  | 0.023369  | 2.502590  |
| C  | -1.535237 | 6.600909  | 0.806009  | C | 1.928195  | -7.137001 | -0.259041 |
| C  | -0.082786 | 2.916312  | 3.667075  | H | 1.519568  | -7.732716 | -1.077170 |
| H  | 0.788467  | 2.307454  | 3.920121  | C | -2.134775 | 1.208940  | -2.727151 |
| C  | -2.519918 | -0.866983 | 2.129576  | H | -1.511327 | 0.419089  | -3.147044 |
| C  | 2.425820  | 3.134180  | -1.648405 | C | 0.003729  | -5.543104 | -0.626938 |
| H  | 2.979331  | 3.703286  | -2.390991 | H | -0.290625 | -6.372426 | -1.288185 |
| C  | 0.671376  | 4.780074  | -0.628344 | H | -0.837662 | -5.380780 | 0.064387  |
| H  | 1.209857  | 5.355865  | 0.150119  | C | 9.058129  | -6.536505 | 0.975690  |
| H  | 0.744794  | 5.370445  | -1.559441 | H | 9.294753  | -7.596873 | 0.797535  |
| C  | 7.189898  | -4.844811 | 1.242407  | H | 9.495337  | -6.255234 | 1.948975  |
| H  | 7.349816  | -4.607579 | 2.311497  | H | 9.578409  | -5.949268 | 0.201280  |
| H  | 7.851698  | -4.173834 | 0.666623  | C | -5.542628 | 4.763426  | -2.316850 |
| C  | -4.130101 | 1.889927  | -1.509066 | H | -6.105556 | 3.947664  | -2.810204 |
| C  | -3.884508 | 2.654243  | 3.995086  | H | -4.966311 | 5.277284  | -3.109813 |
| H  | -3.733249 | 1.618059  | 4.340000  | C | -0.192329 | -3.243192 | 3.559396  |
| H  | -4.315592 | 3.188611  | 4.857051  | H | -0.773102 | -3.584812 | 4.428896  |
| C  | -2.166326 | 5.024409  | -2.664386 | H | 0.723027  | -2.758928 | 3.923735  |
| H  | -1.147976 | 4.990649  | -3.085885 | C | -4.941208 | 7.070100  | 3.344702  |
| H  | -2.786664 | 5.466904  | -3.461167 | H | -5.695744 | 6.471003  | 2.809115  |
| C  | 0.631018  | -1.897493 | -2.853552 | H | -4.449707 | 7.693871  | 2.580800  |
| H  | 0.804463  | -0.963077 | -3.395483 | C | 1.523237  | -7.865500 | -5.795337 |
| C  | 0.079364  | 4.171158  | 3.071799  | H | 2.167712  | -7.305508 | -6.492145 |
| H  | 1.083418  | 4.529940  | 2.829924  | H | 0.483012  | -7.753370 | -6.146099 |
| C  | -2.326169 | -2.080586 | 2.768856  | H | 1.792922  | -8.929574 | -5.882377 |
| H  | -3.018223 | -2.831396 | 3.141487  | C | -6.485363 | 5.742986  | -1.638007 |
| C  | -6.121202 | 3.373976  | 3.066214  | H | -7.062833 | 5.201844  | -0.870755 |
| H  | -6.298929 | 3.886504  | 4.015257  | H | -5.874878 | 6.482949  | -1.095227 |
| C  | -5.413554 | 1.509088  | -0.784678 | C | -5.604258 | 7.944621  | 4.407475  |
| H  | -6.271001 | 1.813138  | -1.407304 | H | -6.323042 | 8.640547  | 3.947233  |
| H  | -5.463586 | 0.406889  | -0.750919 | H | -4.865854 | 8.550237  | 4.960797  |
| C  | -2.958206 | 8.079299  | -0.517204 | H | -6.155678 | 7.340547  | 5.148060  |
| H  | -3.522477 | 9.010202  | -0.609982 | C | -7.422074 | 6.439794  | -2.624718 |
| C  | -3.791991 | -0.190889 | 1.693528  | H | -8.042158 | 5.717968  | -3.184084 |
| H  | -4.135804 | -0.636617 | 0.740809  | H | -6.861867 | 7.035814  | -3.365617 |
| H  | -4.581895 | -0.388206 | 2.439835  | H | -8.106347 | 7.124627  | -2.099380 |
| C  | 3.714098  | -4.657102 | 2.810610  |   |           |           |           |

Complex CF<sub>3</sub>Ag<sup>+</sup> (isomer 2) E = -4093.390853 E<sub>h</sub>

|   |           |           |           |    |           |            |           |
|---|-----------|-----------|-----------|----|-----------|------------|-----------|
| C | 1.728703  | -7.149597 | 3.337028  | H  | -4.107016 | -6.048945  | -1.835934 |
| C | 1.552495  | -5.899731 | 2.726956  | C  | -3.255132 | -7.699710  | 0.729554  |
| C | 0.253208  | -5.354038 | 2.689386  | H  | 1.883484  | 2.819495   | 3.521695  |
| C | -0.856518 | -6.042215 | 3.218578  | H  | 0.275609  | 3.287043   | 4.155434  |
| C | -0.629109 | -7.291616 | 3.816279  | H  | 0.690063  | -1.887444  | 0.993169  |
| C | 0.649107  | -7.843905 | 3.882697  | H  | -1.070821 | -2.012840  | 1.234447  |
| C | -2.268410 | -5.471013 | 3.248880  | H  | -0.706212 | -2.917174  | 3.538498  |
| C | -2.823581 | -4.749982 | 2.033178  | H  | 1.063371  | -2.826801  | 3.301906  |
| C | -3.382793 | -3.473611 | 2.182498  | H  | 3.092651  | 7.543471   | 2.786640  |
| C | -3.946946 | -2.802357 | 1.095778  | H  | -1.169938 | 7.777245   | 3.338259  |
| C | -3.920502 | -3.396588 | -0.165815 | H  | 1.074864  | 8.839316   | 3.443851  |
| C | -3.354569 | -4.665898 | -0.365755 | H  | -2.533646 | 5.982515   | 3.006436  |
| C | -2.851100 | -5.353079 | 0.756992  | H  | -1.875836 | 4.404669   | 3.400756  |
| C | -3.336078 | -5.262822 | -1.765400 | H  | -2.803701 | 2.749462   | 2.196048  |
| O | -2.333295 | -6.615087 | 0.610952  | H  | -3.580297 | 3.125274   | -2.023429 |
| O | 0.061807  | -4.152936 | 2.035611  | H  | -3.279879 | 6.458799   | -2.412303 |
| N | -0.137377 | -0.509125 | 2.317258  | H  | -2.929667 | 4.941038   | -3.204155 |
| N | -1.262557 | -0.029614 | 2.877442  | C  | -2.790690 | 7.736563   | 0.323965  |
| N | -1.027595 | 1.179184  | 3.278635  | H  | -2.968895 | -7.732932  | -2.802466 |
| C | 0.264174  | 1.512690  | 2.986005  | H  | 1.219178  | -7.436537  | -3.739561 |
| C | 0.848509  | 0.418268  | 2.363127  | H  | -0.902129 | -8.727729  | -3.773229 |
| C | 0.807772  | 2.863073  | 3.291383  | H  | 1.693796  | -4.168563  | -3.581910 |
| C | -0.111747 | -1.848567 | 1.742284  | H  | 2.450404  | -5.689069  | -3.185171 |
| C | 0.095573  | -2.953410 | 2.778523  | H  | 2.839764  | -2.534844  | -2.531129 |
| O | 0.612283  | 3.755142  | 2.151438  | H  | 3.726749  | -2.700475  | 1.679031  |
| C | 2.110285  | 7.063927  | 2.779406  | H  | 3.612508  | -5.882801  | 2.208823  |
| C | 2.015678  | 5.717294  | 2.401703  | H  | 3.072944  | -4.409318  | 2.972111  |
| C | 0.739560  | 5.124771  | 2.430506  | C  | 2.606934  | -7.402971  | -0.397076 |
| C | -0.430160 | 5.851953  | 2.716468  | H  | -1.144240 | 3.395772   | -4.072815 |
| C | -0.279849 | 7.195891  | 3.085758  | H  | 0.596373  | 3.047445   | -4.052262 |
| C | 0.978289  | 7.794372  | 3.139670  | H  | -2.490889 | -1.733096  | -3.041882 |
| C | -1.812696 | 5.222107  | 2.664522  | H  | -2.040134 | -1.842942  | -1.323278 |
| C | -2.284183 | 4.658060  | 1.328419  | H  | 0.413638  | -2.308581  | -2.315299 |
| C | -2.796927 | 3.349322  | 1.282831  | H  | -0.525644 | -2.991077  | -3.677515 |
| C | -3.293642 | 2.811214  | 0.093560  | H  | -1.997425 | 8.118624   | -3.234800 |
| C | -3.226246 | 3.558138  | -1.083044 | H  | 2.243170  | 7.679529   | -3.817156 |
| C | -2.692205 | 4.854248  | -1.091113 | H  | 0.189107  | 9.072236   | -3.933233 |
| C | -2.276554 | 5.418040  | 0.136341  | H  | 3.334522  | 5.779506   | -3.341485 |
| C | -2.574052 | 5.612215  | -2.403144 | H  | 2.491344  | 4.354656   | -3.901090 |
| O | -1.808843 | 6.707400  | 0.158745  | H  | 3.166233  | 2.473983   | -2.834498 |
| C | -2.038716 | -7.158065 | -2.813109 | H  | 3.824641  | 2.360984   | 1.419236  |
| C | -2.037908 | -5.858800 | -2.289015 | H  | 3.505993  | 4.187708   | 2.742631  |
| C | -0.834584 | -5.123389 | -2.330939 | H  | 4.110627  | 5.667594   | 2.032839  |
| C | 0.363740  | -5.689200 | -2.813072 | C  | 3.764315  | 7.241680   | -0.612462 |
| C | 0.304264  | -6.987973 | -3.342206 | H  | -3.997801 | -7.661392  | -0.091829 |
| C | -0.882330 | -7.718777 | -3.354446 | H  | -3.823607 | -7.612319  | 1.675935  |
| C | 1.703393  | -4.965303 | -2.818452 | C  | -2.480782 | -9.007882  | 0.686487  |
| C | 2.230190  | -4.347345 | -1.529474 | C  | -2.103874 | 9.092500   | 0.272075  |
| C | 2.801666  | -3.065673 | -1.574808 | H  | -3.318764 | 7.600538   | 1.287578  |
| C | 3.347853  | -2.474885 | -0.434951 | H  | -3.557536 | 7.660240   | -0.470727 |
| C | 3.304914  | -3.160460 | 0.779856  | H  | 3.402954  | -7.356508  | 0.370829  |
| C | 2.747515  | -4.444796 | 0.873937  | H  | 3.108950  | -7.343201  | -1.382787 |
| C | 2.243026  | -5.044078 | -0.301126 | C  | 1.817745  | -8.696237  | -0.269977 |
| C | 2.779394  | -5.158784 | 2.216027  | C  | 3.239649  | 8.667487   | -0.544468 |
| O | 1.709256  | -6.301939 | -0.241988 | H  | 4.285689  | 7.060977   | -1.572298 |
| O | -0.871056 | -3.845341 | -1.807099 | H  | 4.505283  | 7.058157   | 0.189237  |
| N | -1.157671 | -0.289593 | -2.353876 | H  | -1.751665 | -9.007151  | 1.513907  |
| N | -0.642942 | 0.224723  | -1.245007 | H  | -1.890054 | -9.027286  | -0.244938 |
| N | -0.295112 | 1.454577  | -1.515551 | C  | -3.390587 | -10.234200 | 0.770652  |
| C | -0.587306 | 1.758121  | -2.808339 | H  | -1.553434 | 9.166806   | -0.680615 |
| C | -1.148553 | 0.621036  | -3.364475 | H  | -1.341786 | 9.131755   | 1.067803  |
| C | -0.306271 | 3.104239  | -3.414271 | C  | -3.088418 | 10.254411  | 0.414944  |
| C | -1.652432 | -1.666505 | -2.334514 | H  | 1.027940  | -8.697863  | -1.039069 |
| C | -0.565605 | -2.723791 | -2.607414 | H  | 1.301814  | -8.688501  | 0.704516  |
| O | -0.122913 | 4.049733  | -2.376262 | C  | 2.700128  | -9.938366  | -0.401183 |
| C | -1.098531 | 7.496665  | -3.207022 | H  | 2.689489  | 8.790788   | 0.402953  |
| C | -1.205991 | 6.164738  | -2.782168 | H  | 2.496102  | 8.802669   | -1.346830 |
| C | -0.032976 | 5.383990  | -2.774493 | C  | 4.350142  | 9.712673   | -0.661221 |
| C | 1.227614  | 5.914308  | -3.110242 | H  | -4.107260 | -10.267511 | -0.067598 |
| C | 1.278505  | 7.250387  | -3.533239 | H  | -3.975959 | -10.245276 | 1.705742  |
| C | 0.127685  | 8.034961  | -3.595443 | H  | -2.803705 | -11.165405 | 0.739511  |
| C | 2.511002  | 5.094502  | -3.082386 | H  | -3.631723 | 10.214244  | 1.374038  |
| C | 2.872529  | 4.348077  | -1.806814 | H  | -3.841204 | 10.251978  | -0.391437 |
| C | 3.192043  | 2.983800  | -1.867107 | H  | -2.564814 | 11.222019  | 0.373843  |
| C | 3.548593  | 2.271594  | -0.720966 | H  | 3.476767  | -9.971609  | 0.381852  |
| C | 3.557339  | 2.918011  | 0.516443  | H  | 3.213556  | -9.975175  | -1.377180 |
| C | 3.246254  | 4.282593  | 0.626650  | H  | 2.101998  | -10.858472 | -0.310313 |
| C | 2.944842  | 4.998773  | -0.554203 | H  | 4.893861  | 9.626616   | -1.617160 |
| C | 3.268191  | 4.958169  | 1.990566  | H  | 5.091694  | 9.616240   | 0.149846  |
| O | 2.662731  | 6.336684  | -0.477188 | H  | 3.936920  | 10.731781  | -0.608815 |
| H | 2.732706  | -7.581408 | 3.384662  | H  | -4.397798 | -1.816852  | 1.235470  |
| H | -1.477373 | -7.837790 | 4.238874  | H  | 1.843362  | 0.235965   | 1.966103  |
| H | 0.802900  | -8.817072 | 4.355238  | H  | -3.708747 | 1.800789   | 0.086426  |
| H | -2.344687 | -4.776383 | 4.104323  | H  | 3.812988  | -1.487442  | -0.496224 |
| H | -2.943208 | -6.305290 | 3.504541  | H  | -1.540423 | 0.405516   | -4.355221 |
| H | -3.384193 | -3.000217 | 3.168369  | H  | 3.809663  | 1.212925   | -0.791062 |
| H | -4.359298 | -2.873583 | -1.021297 | Ag | 0.143907  | 2.887363   | 0.109323  |
| H | -3.669147 | -4.471881 | -2.460397 |    |           |            |           |

Calculations were performed in ORCA 4.2.1 program package<sup>S13</sup> at the DFT level using B3LYP functional and def2-SVP basis set<sup>S14</sup> for all atoms except for Ag, for which SDD<sup>S15</sup> effective core potential was used.

## References

- S1. (a) A. Arduini, M. Fabbi, M. Mantovani, L. Mirone, A. Pochini, A. Secchi and R. Ungaro, Calix[4]arenes blocked in a rigid cone conformation by selective functionalization at the lower rim, *J. Org. Chem.*, 1995, **60**, 1454–1457; (b) A. Casnati, A. Pochini, R. Ungaro, F. Uguzzoli, F. Arnaud, S. Fanni, M.-J. Schwing, R. J. M. Egberink, F. de Jong and D. N. Reinhoudt, Synthesis, complexation, and membrane transport studies of 1,3-alternate calix[4]arene-crown-6 conformers: a new class of cesium selective ionophores, *J. Am. Chem. Soc.*, 1995, **117**, 2767–2777.
- S2. W. Xu, J. J. Vittal and R. J. Puddephatt, Propargyl calix[4]arenes and their complexes with silver(I) and gold(I), *Can. J. Chem.*, 1996, **74**, 766–774.
- S3. (a) X. Zeng, L. Weng, L. Chen, F. Xu, Q. Li, X. Leng, X. He and Z.-Z. Zhang, The syntheses and Ag<sup>+</sup>-selective electrode properties of benzothiazolylthioalkoxy functionalized calix[4]arenes: an investigation of the structure-selectivity relationship in the ionophore-based ISEs, *Tetrahedron*, 2002, **58**, 2647–2658; (b) X. Zeng, L. Chen, L. Weng, H. Ju, X. He and Z.-Z. Zhang, Syntheses and ion-selective properties of 25,27-bis(2-hydroxyethylthioalkoxy)-26,28-dihydroxycalix[4]arenes, *J. Chem. Res. (S)*, 2000, 518–519.
- S4. Z. Asfari, A. Bilyk, C. Bond, J. M. Harrowfield, G. A. Koutsantonis, N. Lengkeek, M. Mocerino, B. W. Skelton, A. N. Sobolev, S. Strano, J. Vicens and A. H. White, Factors influencing solvent adduct formation by calixarenes in the solid state, *Org. Biomol. Chem.*, 2004, **2**, 387–396.
- S5. S. Cecioni, R. Lalor, B. Blanchard, J.-P. Praly, A. Imberty, S. E. Matthews and S. Vidal, Achieving high affinity towards a bacterial lectin through multivalent topological isomers of calix[4]arene glycoconjugates, *Chem. – Eur. J.*, 2009, **15**, 13232–13240.
- S6. Z.-G. Luo, Y. Zhao, F. Xu, C. Ma, X.-M. Xu and X.-M. Zhang, Synthesis and thermal properties of novel calix[4]arene derivatives containing 1,2,3-triazole moiety via K<sub>2</sub>CO<sub>3</sub>-catalyzed 1,3-dipolar cycloaddition reaction, *Chinese Chem. Lett.*, 2014, **25**, 1346–1348.
- S7. Y. Nishizawa, Studies on organophosphorus compounds. II. On phosphite cuprous halide complex compounds, *Bull. Chem. Soc. Jpn.* 1961, **34**, 1170–1178.
- S8. S. K. Kim, S. H. Lee, J. Y. Lee, J. Y. Lee, R. A. Bartsch and J. S. Kim, An excimer-based, binuclear, on-off switchable calix[4]crown chemosensor, *J. Am. Chem. Soc.*, 2004, **126**, 16499–16506.
- S9. A. Gorbunov, J. Kuznetsova, K. Puchnin, V. Kovalev and I. Vatsouro, Triazolated calix[4]arenes from 2-azidoethylated precursors: is there a difference in the way the triazoles are attached to narrow rims?, *New J. Chem.*, 2019, **43**, 4562–4580.
- S10. J. Morales-Sanfrutos, M. Ortega-Muñoz, J. Lopez-Jaramillo, F. Hernandez-Mateo and F. Santoyo-Gonzalez, Synthesis of calixarene-based cavitands and nanotubes by click chemistry, *J. Org. Chem.*, 2008, **73**, 7768–7771.
- S11. G. M. Sheldrick, A short history of *SHELX*, *Acta Crystallogr.*, 2008, **A64**, 112–122.
- S12. A. L. Spek, Single-crystal structure validation with the program *PLATON*, *J. Appl. Cryst.*, 2003, **36**, 7–13.

- S13. (a) F. Neese, The ORCA program system, *WIREs Comput. Mol. Sci.*, 2012, **2**, 73–78; (b) F. Neese, Software update: the ORCA program system, version 4.0, *WIREs Comput. Mol. Sci.*, 2018, **8**, e1327; (c) F. Neese, F. Wennmohs, A. Hansen and U. Becker, Efficient, approximate and parallel Hartree–Fock and hybrid DFT calculations. A ‘chain-of-spheres’ algorithm for the Hartree–Fock exchange, *Chem. Phys.*, 2009, **356**, 98–109.
- S14. (a) F. Weigend and R. Ahlrichs, Balanced basis sets of split valence, triple zeta valence and quadruple zeta valence quality for H to Rn: Design and assessment of accuracy, *Phys. Chem. Chem. Phys.*, 2005, **7**, 3297–3305; (b) F. Weigend, Accurate Coulomb-fitting basis sets for H to Rn, *Phys. Chem. Chem. Phys.*, 2006, **8**, 1057–1065.
- S15. D. Andrae, U. Häußermann, M. Dolg, H. Stoll, H. Preuß, Energy-adjusted ab initio pseudopotentials for the second and third row transition elements, *Theor. Chim. Acta*, 1990, **77**, 123–141.
